# Supplementary material for: The Impact of Social Determinants of Health on Meningococcal Vaccination Awareness, Delivery, and Coverage in Adolescents and Young Adults in the United States: A Systematic Review
Source: MDPI journal article supplement (doi:10.3390/vaccines11020256), 2023-01-24
Supplement: s1 [file s1]

# Supplementary Material

**Table S-1. Electronic Database Search Strategies**

**Table S-1a. MEDLINE Search Strategy (Conducted 10 June 2022)**

**Limits: humans; English; no comments, letters, editorials; US only**

| Search no.           | Search terms                                                                                                                                                                                                                                                                                                                                                                                                                                                                                                                                                                                                                                                                                                                                                                                                                                                                                                                                                                                                                                                                                                                                                                                                                                                                                                                                                   |
|----------------------|----------------------------------------------------------------------------------------------------------------------------------------------------------------------------------------------------------------------------------------------------------------------------------------------------------------------------------------------------------------------------------------------------------------------------------------------------------------------------------------------------------------------------------------------------------------------------------------------------------------------------------------------------------------------------------------------------------------------------------------------------------------------------------------------------------------------------------------------------------------------------------------------------------------------------------------------------------------------------------------------------------------------------------------------------------------------------------------------------------------------------------------------------------------------------------------------------------------------------------------------------------------------------------------------------------------------------------------------------------------|
| <b>Disease</b>       |                                                                                                                                                                                                                                                                                                                                                                                                                                                                                                                                                                                                                                                                                                                                                                                                                                                                                                                                                                                                                                                                                                                                                                                                                                                                                                                                                                |
| 1                    | exp Meningococcal Infections/ or exp Neisseria meningitidis/ or meningiti*.tw. or meningococc*.tw. or Micrococcus intracellularis.tw. or Neisseria weichselbaumi.tw. or IMD.tw.                                                                                                                                                                                                                                                                                                                                                                                                                                                                                                                                                                                                                                                                                                                                                                                                                                                                                                                                                                                                                                                                                                                                                                                |
| <b>Vaccination</b>   |                                                                                                                                                                                                                                                                                                                                                                                                                                                                                                                                                                                                                                                                                                                                                                                                                                                                                                                                                                                                                                                                                                                                                                                                                                                                                                                                                                |
| 2                    | exp Vaccination/ or Vaccines/ or exp Immunization/ or exp Immunization Programs/ or vaccin*.tw. or immuni*.tw.                                                                                                                                                                                                                                                                                                                                                                                                                                                                                                                                                                                                                                                                                                                                                                                                                                                                                                                                                                                                                                                                                                                                                                                                                                                 |
| 3                    | 1 and 2                                                                                                                                                                                                                                                                                                                                                                                                                                                                                                                                                                                                                                                                                                                                                                                                                                                                                                                                                                                                                                                                                                                                                                                                                                                                                                                                                        |
| 4                    | exp Meningococcal Vaccines/ or (acwy vax or meningococcal vacci* or antimeningococcal vacci* or bexsero or mc 4 vacci* or mc4 vacci* or MCP CRM197 conjugate vacci* or men quad tt or menactra or menacwy or menafrivac or menbvac or mencevax or meningitec or meningoccal vacci* or meningococcal group B vacci* or meningococcus vacci* or meninvact or menjugate or menomune or menpovax or menquadfi or menveo or menzb or neisvac c or New Zealand candidate vacci* or nimenrix or nonamen or tetramen-t or trumenba or va mengoc bc).tw.                                                                                                                                                                                                                                                                                                                                                                                                                                                                                                                                                                                                                                                                                                                                                                                                                |
| 5                    | 3 or 4                                                                                                                                                                                                                                                                                                                                                                                                                                                                                                                                                                                                                                                                                                                                                                                                                                                                                                                                                                                                                                                                                                                                                                                                                                                                                                                                                         |
| <b>Health equity</b> |                                                                                                                                                                                                                                                                                                                                                                                                                                                                                                                                                                                                                                                                                                                                                                                                                                                                                                                                                                                                                                                                                                                                                                                                                                                                                                                                                                |
| 6                    | exp Health Equity/ or exp Healthcare Disparities/ OR exp Health Status Disparities/ OR (health* adj3 (disparit* or inequalit* or inequit* or equit* or equalit*)).tw.                                                                                                                                                                                                                                                                                                                                                                                                                                                                                                                                                                                                                                                                                                                                                                                                                                                                                                                                                                                                                                                                                                                                                                                          |
| 7                    | 5 and 6                                                                                                                                                                                                                                                                                                                                                                                                                                                                                                                                                                                                                                                                                                                                                                                                                                                                                                                                                                                                                                                                                                                                                                                                                                                                                                                                                        |
| 8                    | exp Minority Health/ or exp "health disparity, minority and vulnerable populations"/ or "ethnic and racial minorities"/ or hierarchy, social/ or social marginalization/ or social vulnerability/ or exp "Social Determinants of Health"/ or Minority Health.tw. or vulnerable*.tw. or disadvantaged.tw. or under served.tw. or underserved.tw. or neglect*.tw. or marginal*.tw. or socially excluded.tw. or social deprivation.tw. or social disparit*.tw. or social determinant*.tw. or social inequit*.tw. or racial disparit*.tw. or racial inequit*.tw. or racial equalit*.tw. or racial equity.tw. or ethnic disparit*.tw. or ((ethnic* or minorit* or race* or racial) adj3 (background or communit* or group* or population*)).tw. or (high-risk adj3 (communit* or group* or population* or people or person*)).tw. or exp African Americans/ or african american*.tw. or african ancestry.tw. or exp African Continental Ancestry Group/ or aian.tw. or exp American Native Continental Ancestry Group/ or Asian Continental Ancestry Group/ or asian*.tw. or black*1.tw. or caucasian*1.tw. or ghetto*1.tw. or hispanic*1.tw. or indian*1.tw. or latino*1.tw. or latina*1.tw. or native american*1.tw. or oceanic ancestry group/ or pacific islander*1.tw. or people of color.tw. or people of colour.tw. or slum*1.tw. or white.tw. or whites.tw. |
| 9                    | 5 and 8                                                                                                                                                                                                                                                                                                                                                                                                                                                                                                                                                                                                                                                                                                                                                                                                                                                                                                                                                                                                                                                                                                                                                                                                                                                                                                                                                        |
| 10                   | exp "Emigrants and Immigrants"/ or emigrant*.tw. or Immigrant*.tw. or migrant*.tw. or exp Refugees/ or refugee*.tw. or Asylum Seeker*.tw. or displaced person*.tw.                                                                                                                                                                                                                                                                                                                                                                                                                                                                                                                                                                                                                                                                                                                                                                                                                                                                                                                                                                                                                                                                                                                                                                                             |
| 11                   | 5 and 10                                                                                                                                                                                                                                                                                                                                                                                                                                                                                                                                                                                                                                                                                                                                                                                                                                                                                                                                                                                                                                                                                                                                                                                                                                                                                                                                                       |
| 12                   | exp Poverty/ or exp poverty area/ or exp Medically Underserved Area/ or hierarchy, social/ or exp socioeconomic factors/ or poverty.tw. or low income*.tw. or middle                                                                                                                                                                                                                                                                                                                                                                                                                                                                                                                                                                                                                                                                                                                                                                                                                                                                                                                                                                                                                                                                                                                                                                                           |

| Search no. | Search terms                                                                                                                                                                                                                                                                                                                                                                                                                                                                                                                                                                                                                                                          |
|------------|-----------------------------------------------------------------------------------------------------------------------------------------------------------------------------------------------------------------------------------------------------------------------------------------------------------------------------------------------------------------------------------------------------------------------------------------------------------------------------------------------------------------------------------------------------------------------------------------------------------------------------------------------------------------------|
|            | income*.tw. or low resource*.tw. or impoverish.tw. or indigence.tw. or indigency.tw. or exp Homeless Persons/ or homeless.tw. or jobless.tw. or job seek*.tw. or single parent*.tw. or single mother*.tw. or lone parent*.tw. or health insurance status.tw. or (socio economic* adj3 (inequalit* or unequal* or inequit* or disparit* or imparit* or discrepant* or imbalance* or factor*)).tw.                                                                                                                                                                                                                                                                      |
| 13         | 5 and 12                                                                                                                                                                                                                                                                                                                                                                                                                                                                                                                                                                                                                                                              |
| 14         | exp "Sexual and Gender Minorities"/ or ((Sexual or Gender) adj2 Minorit*).tw. or homosexual*.tw. or homo sexual*.tw. or bisexual*.tw. or gay.tw. or gays.tw. or lesbian*.tw. or pansexual*.tw. or queer*.tw. or asexual*.tw. or transgender*.tw. or transsexual*.tw. or intersex*.tw. or gender-expansive.tw. or LGBT*.tw. or GLBTI*.tw. or 2 spirit*.tw. or gender diverse.tw. or gender fluid*.tw. or non binary.tw. or men who have sex with men.tw.                                                                                                                                                                                                               |
| 15         | 5 and 14                                                                                                                                                                                                                                                                                                                                                                                                                                                                                                                                                                                                                                                              |
| 16         | exp sociodemographic factors/ or exp community resources/ or exp Health Services Accessibility/ or "Health Services Needs and Demand"/ or exp health services, indigenous/ or exp rural health/ or exp rural health services/ or exp urban health/ or exp urban health services/ or exp rural population/ or exp urban population/ or ((geographic or regional or urban or rural or demographic or cultural) adj4 (inequalit* or unequal* or inequit* or disparit* or imparit* or discrepant* or imbalance* or barrier* or facilitat* or motivat*)).tw. or rural area*.tw. or rural population*.tw. or rural health*.tw. or urban health*.tw. or urban population.tw. |
| 17         | 5 and 16                                                                                                                                                                                                                                                                                                                                                                                                                                                                                                                                                                                                                                                              |
| 18         | ((improv* or enhanc* or encourag* or increas* or support* or assist* or maxim* or promot* or facilitat*) adj3 (uptake or cover* or acceptanc* or complianc* or complet* or acceptab* or adoption or rate* or access or equit* or equalit*)).tw.                                                                                                                                                                                                                                                                                                                                                                                                                       |
| 19         | 5 and 18                                                                                                                                                                                                                                                                                                                                                                                                                                                                                                                                                                                                                                                              |
| 20         | ((decreas* or reduc* or minim* or detect* or chang*) adj3 (inequalit* or unequal* or inequit* or disparit* or imparit* or discrepant* or imbalance*)).tw.                                                                                                                                                                                                                                                                                                                                                                                                                                                                                                             |
| 21         | 5 and 20                                                                                                                                                                                                                                                                                                                                                                                                                                                                                                                                                                                                                                                              |
| 22         | exp Anti-Vaccination Movement/ or Anti-Vaccination.tw. or anti-VAC.tw. or anti-vaccine.tw. or anti-vax*.tw. or antivaccinal.tw. or antivaccination.tw. or antivaccine.tw. or antivax*.tw.                                                                                                                                                                                                                                                                                                                                                                                                                                                                             |
| 23         | 5 and 22                                                                                                                                                                                                                                                                                                                                                                                                                                                                                                                                                                                                                                                              |
| 24         | exp Vaccination Hesitancy/ or ((vaccin* or immuni*) adj3 (hesitan* or refus* or delay* or barrier* or obstacle* or restrict* or obstruct* or impede* or restrain* or constrain* or inhibit*)).tw.                                                                                                                                                                                                                                                                                                                                                                                                                                                                     |
| 25         | 5 and 24                                                                                                                                                                                                                                                                                                                                                                                                                                                                                                                                                                                                                                                              |
| 26         | exp Health Promotion/ or ((vaccin* or immuni*) adj3 (equit* or confidence or complet* or compliance or comply or complie* or adher* or access* or facilitat* or uptake or up take or take up or improve* or enhance* or encourag* or support* or promot* or optimiz* or optimis* or motivat* or accept* or incentive* or attend* or adopt* or persuad* or persuasion or attitud* or know* or awareness* or affordab*)).tw.                                                                                                                                                                                                                                            |
| 27         | 5 and 26                                                                                                                                                                                                                                                                                                                                                                                                                                                                                                                                                                                                                                                              |
| 28         | exp Physician Incentive Plans/ or exp Reimbursement, Incentive/ or exp Medical Audit/ or exp Clinical Audit/ or incentive plan*.tw. or reimbursement*.tw. or medical audit*.tw. or clinical audit*.tw. or ((pediatric* or parent* or gp or general practic* or physician* or doctor* or clinician* or nurse practitioner* or midwife or midwives) adj3 (attitud* or know* or awareness*)).tw. or ((vaccin* or immuni* or parent* or household* or house-hold* or clinical) adj3 decision-making).tw.                                                                                                                                                                  |
| 29         | 5 and 28                                                                                                                                                                                                                                                                                                                                                                                                                                                                                                                                                                                                                                                              |
| 30         | Exp Health Behavior/ or exp Unsafe Sex/ or ((unprotect* or condomless or risk or high-risk) adj3 (sex* or intercourse*)).tw. or (sex* adj2 (behavior* or behaviour*)).tw.                                                                                                                                                                                                                                                                                                                                                                                                                                                                                             |
| 31         | 5 and 30                                                                                                                                                                                                                                                                                                                                                                                                                                                                                                                                                                                                                                                              |

| Search no.        | Search terms                                                                                                                                                                                                                                                                                                                                                                                                                                                                                                                                                                                                                                                                                                                                                                                                                                                                                                                                                                                                                                                                                                                                                                                                                                                                                                                                                                                                                                                                                                                                                                                                                                                                                                                                                                                                                                         |
|-------------------|------------------------------------------------------------------------------------------------------------------------------------------------------------------------------------------------------------------------------------------------------------------------------------------------------------------------------------------------------------------------------------------------------------------------------------------------------------------------------------------------------------------------------------------------------------------------------------------------------------------------------------------------------------------------------------------------------------------------------------------------------------------------------------------------------------------------------------------------------------------------------------------------------------------------------------------------------------------------------------------------------------------------------------------------------------------------------------------------------------------------------------------------------------------------------------------------------------------------------------------------------------------------------------------------------------------------------------------------------------------------------------------------------------------------------------------------------------------------------------------------------------------------------------------------------------------------------------------------------------------------------------------------------------------------------------------------------------------------------------------------------------------------------------------------------------------------------------------------------|
| 32                | exp Alcoholism/ or alcoholism.tw. or (alcohol* adj2 (dependenc* or addiction* or abuse or intoxication* or use*)).tw.                                                                                                                                                                                                                                                                                                                                                                                                                                                                                                                                                                                                                                                                                                                                                                                                                                                                                                                                                                                                                                                                                                                                                                                                                                                                                                                                                                                                                                                                                                                                                                                                                                                                                                                                |
| 33                | 5 and 32                                                                                                                                                                                                                                                                                                                                                                                                                                                                                                                                                                                                                                                                                                                                                                                                                                                                                                                                                                                                                                                                                                                                                                                                                                                                                                                                                                                                                                                                                                                                                                                                                                                                                                                                                                                                                                             |
| 34                | exp Drug Misuse/ or exp illicit drugs/ or ((drug* or substance* or non prescription* or nonprescription*) adj2 (misuse or abuse or addiction* or dependenc* or use*)).tw.                                                                                                                                                                                                                                                                                                                                                                                                                                                                                                                                                                                                                                                                                                                                                                                                                                                                                                                                                                                                                                                                                                                                                                                                                                                                                                                                                                                                                                                                                                                                                                                                                                                                            |
| 35                | 5 and 34                                                                                                                                                                                                                                                                                                                                                                                                                                                                                                                                                                                                                                                                                                                                                                                                                                                                                                                                                                                                                                                                                                                                                                                                                                                                                                                                                                                                                                                                                                                                                                                                                                                                                                                                                                                                                                             |
| 36                | exp smoking/ or smoking.tw. or smoker*.tw.                                                                                                                                                                                                                                                                                                                                                                                                                                                                                                                                                                                                                                                                                                                                                                                                                                                                                                                                                                                                                                                                                                                                                                                                                                                                                                                                                                                                                                                                                                                                                                                                                                                                                                                                                                                                           |
| 37                | 5 and 36                                                                                                                                                                                                                                                                                                                                                                                                                                                                                                                                                                                                                                                                                                                                                                                                                                                                                                                                                                                                                                                                                                                                                                                                                                                                                                                                                                                                                                                                                                                                                                                                                                                                                                                                                                                                                                             |
| 38                | Exp Religion/ or religion*.tw. or religious.tw. or prayer*.tw. or spirituality.tw. or theology.tw. or Mysticism.tw. or buddhism.tw. or christian*.tw. or confucianism.tw. or hinduism.tw. or islam*.tw. or judaism.tw. or mormonism.tw. or shamanism.tw. or taoism.tw.                                                                                                                                                                                                                                                                                                                                                                                                                                                                                                                                                                                                                                                                                                                                                                                                                                                                                                                                                                                                                                                                                                                                                                                                                                                                                                                                                                                                                                                                                                                                                                               |
| 39                | 5 and 38                                                                                                                                                                                                                                                                                                                                                                                                                                                                                                                                                                                                                                                                                                                                                                                                                                                                                                                                                                                                                                                                                                                                                                                                                                                                                                                                                                                                                                                                                                                                                                                                                                                                                                                                                                                                                                             |
| 40                | exp educational status/ or (educational adj3 status).tw. or literacy.tw. or illiteracy.tw. or (academic adj2 fail*).tw.                                                                                                                                                                                                                                                                                                                                                                                                                                                                                                                                                                                                                                                                                                                                                                                                                                                                                                                                                                                                                                                                                                                                                                                                                                                                                                                                                                                                                                                                                                                                                                                                                                                                                                                              |
| 41                | 5 and 40                                                                                                                                                                                                                                                                                                                                                                                                                                                                                                                                                                                                                                                                                                                                                                                                                                                                                                                                                                                                                                                                                                                                                                                                                                                                                                                                                                                                                                                                                                                                                                                                                                                                                                                                                                                                                                             |
| 42                | exp Social Justice/ or exp Social Values/ or exp Resource Allocation/ or exp Health Care Rationing/ or exp Health Priorities/es or equity.tw.                                                                                                                                                                                                                                                                                                                                                                                                                                                                                                                                                                                                                                                                                                                                                                                                                                                                                                                                                                                                                                                                                                                                                                                                                                                                                                                                                                                                                                                                                                                                                                                                                                                                                                        |
| 43                | 5 and 42                                                                                                                                                                                                                                                                                                                                                                                                                                                                                                                                                                                                                                                                                                                                                                                                                                                                                                                                                                                                                                                                                                                                                                                                                                                                                                                                                                                                                                                                                                                                                                                                                                                                                                                                                                                                                                             |
| 44                | 7 or 9 or 11 or 13 or 15 or 17 or 19 or 21 or 23 or 25 or 27 or 29 or 31 or 33 or 35 or 37 or 39 or 41 or 43                                                                                                                                                                                                                                                                                                                                                                                                                                                                                                                                                                                                                                                                                                                                                                                                                                                                                                                                                                                                                                                                                                                                                                                                                                                                                                                                                                                                                                                                                                                                                                                                                                                                                                                                         |
| <b>Exclusions</b> |                                                                                                                                                                                                                                                                                                                                                                                                                                                                                                                                                                                                                                                                                                                                                                                                                                                                                                                                                                                                                                                                                                                                                                                                                                                                                                                                                                                                                                                                                                                                                                                                                                                                                                                                                                                                                                                      |
| 45                | (animals/ not humans/) or exp Animals, Laboratory/ or exp Animal Experimentation/ or exp Models, Animal/ or exp Rodentia/ or (rat or rats or mouse or mice).ti.                                                                                                                                                                                                                                                                                                                                                                                                                                                                                                                                                                                                                                                                                                                                                                                                                                                                                                                                                                                                                                                                                                                                                                                                                                                                                                                                                                                                                                                                                                                                                                                                                                                                                      |
| 46                | Comment/ or letter/ or editorial/ or Case Reports/ or news/ or exp historical article/ or Anecdotes as Topic/ or (letter or comment*).ti.                                                                                                                                                                                                                                                                                                                                                                                                                                                                                                                                                                                                                                                                                                                                                                                                                                                                                                                                                                                                                                                                                                                                                                                                                                                                                                                                                                                                                                                                                                                                                                                                                                                                                                            |
| <b>Total</b>      |                                                                                                                                                                                                                                                                                                                                                                                                                                                                                                                                                                                                                                                                                                                                                                                                                                                                                                                                                                                                                                                                                                                                                                                                                                                                                                                                                                                                                                                                                                                                                                                                                                                                                                                                                                                                                                                      |
| 47                | 44 not (45 or 46)                                                                                                                                                                                                                                                                                                                                                                                                                                                                                                                                                                                                                                                                                                                                                                                                                                                                                                                                                                                                                                                                                                                                                                                                                                                                                                                                                                                                                                                                                                                                                                                                                                                                                                                                                                                                                                    |
| 48                | limit 47 to english language                                                                                                                                                                                                                                                                                                                                                                                                                                                                                                                                                                                                                                                                                                                                                                                                                                                                                                                                                                                                                                                                                                                                                                                                                                                                                                                                                                                                                                                                                                                                                                                                                                                                                                                                                                                                                         |
| 49                | exp united states/ or united states.ti,ab. or usa.ti,ab. or united states.in. or usa.in. or us.in. or alabama.in. or alaska.in. or arizona.in. or arkansas.in. or california.in. or colorado.in. or connecticut.in. or delaware.in. or florida.in. or georgia.in. or hawaii.in. or idaho.in. or illinois.in. or indiana.in. or iowa.in. or kansas.in. or kentucky.in. or louisiana.in. or maine.in. or maryland.in. or massachusetts.in. or michigan.in. or minnesota.in. or mississippi.in. or missouri.in. or montana.in. or nebraska.in. or nevada.in. or new hampshire.in. or new jersey.in. or new mexico.in. or new york.in. or north carolina.in. or north dakota.in. or ohio.in. or oklahoma.in. or oregon.in. or pennsylvania.in. or rhode island.in. or south carolina.in. or south dakota.in. or tennessee.in. or texas.in. or utah.in. or vermont.in. or virginia.in. or washington.in. or west virginia.in. or wisconsin.in. or wyoming.in. or puerto rico.in. or alabama.mp. or alaska.mp. or arizona.mp. or arkansas.mp. or california.mp. or colorado.mp. or connecticut.mp. or delaware.mp. or florida.mp. or georgia.mp. or hawaii.mp. or idaho.mp. or illinois.mp. or indiana.mp. or iowa.mp. or kansas.mp. or kentucky.mp. or louisiana.mp. or maine.mp. or maryland.mp. or massachusetts.mp. or michigan.mp. or minnesota.mp. or mississippi.mp. or missouri.mp. or montana.mp. or nebraska.mp. or nevada.mp. or new hampshire.mp. or new jersey.mp. or new mexico.mp. or new york.mp. or north carolina.mp. or north dakota.mp. or ohio.mp. or oklahoma.mp. or oregon.mp. or pennsylvania.mp. or rhode island.mp. or south carolina.mp. or south dakota.mp. or tennessee.mp. or texas.mp. or utah.mp. or vermont.mp. or virginia.mp. or washington.mp. or west virginia.mp. or wisconsin.mp. or wyoming.mp. or puerto rico.mp. |
| 50                | 48 and 49                                                                                                                                                                                                                                                                                                                                                                                                                                                                                                                                                                                                                                                                                                                                                                                                                                                                                                                                                                                                                                                                                                                                                                                                                                                                                                                                                                                                                                                                                                                                                                                                                                                                                                                                                                                                                                            |

**Table S-1b. Embase Search Strategy (Conducted 10 June 2022)**

**Limits: Humans; English; No Comments, letters, editorials or case reports. US only. Abstracts 2020-2022**

| Search No.         | Search Terms                                                                                                                                                                                                                                                                                                                                                                                                                                                                                                                                                                                                                                                                                                                                                                                                                                                                                                                                                                                                                                                                                                                                                                                                                                                                                                                                                           |
|--------------------|------------------------------------------------------------------------------------------------------------------------------------------------------------------------------------------------------------------------------------------------------------------------------------------------------------------------------------------------------------------------------------------------------------------------------------------------------------------------------------------------------------------------------------------------------------------------------------------------------------------------------------------------------------------------------------------------------------------------------------------------------------------------------------------------------------------------------------------------------------------------------------------------------------------------------------------------------------------------------------------------------------------------------------------------------------------------------------------------------------------------------------------------------------------------------------------------------------------------------------------------------------------------------------------------------------------------------------------------------------------------|
| <b>Disease</b>     |                                                                                                                                                                                                                                                                                                                                                                                                                                                                                                                                                                                                                                                                                                                                                                                                                                                                                                                                                                                                                                                                                                                                                                                                                                                                                                                                                                        |
| #1                 | 'meningococcosis'/exp OR 'neisseria meningitidis'/exp OR meningiti*:ti,ab OR meningococc*:ti,ab OR 'micrococcus intracellularis':ti,ab OR 'neisseria weichselbaumi':ti,ab OR imd:ti,ab                                                                                                                                                                                                                                                                                                                                                                                                                                                                                                                                                                                                                                                                                                                                                                                                                                                                                                                                                                                                                                                                                                                                                                                 |
| <b>Vaccination</b> |                                                                                                                                                                                                                                                                                                                                                                                                                                                                                                                                                                                                                                                                                                                                                                                                                                                                                                                                                                                                                                                                                                                                                                                                                                                                                                                                                                        |
| #2                 | 'vaccination'/exp OR 'vaccine'/de OR 'immunization'/exp OR 'preventive health service'/exp OR vaccin*:ti,ab OR immuni*:ti,ab                                                                                                                                                                                                                                                                                                                                                                                                                                                                                                                                                                                                                                                                                                                                                                                                                                                                                                                                                                                                                                                                                                                                                                                                                                           |
| #3                 | #1 AND #2                                                                                                                                                                                                                                                                                                                                                                                                                                                                                                                                                                                                                                                                                                                                                                                                                                                                                                                                                                                                                                                                                                                                                                                                                                                                                                                                                              |
| #4                 | 'meningococcus vaccine'/exp OR 'acwy vax':ti,ab OR 'meningococcal vacci*':ti,ab OR 'antimeningococcal vacci*':ti,ab OR bexsero:ti,ab OR 'mc 4 vacci*':ti,ab OR 'mc4 vacci*':ti,ab OR 'mcp crm197 conjugate vacci*':ti,ab OR 'men quad tt':ti,ab OR menactra:ti,ab OR menacwy:ti,ab OR menafrivac:ti,ab OR menbvax:ti,ab OR mencevax:ti,ab OR meningitec:ti,ab OR 'meningoccal vacci*':ti,ab OR 'meningococcal group b vacci*':ti,ab OR 'meningococcus vacci*':ti,ab OR meninvact:ti,ab OR menjugate:ti,ab OR menomune:ti,ab OR menpovax:ti,ab OR menquadfi:ti,ab OR menveo:ti,ab OR menzb:ti,ab OR 'neisvac c':ti,ab OR 'new zealand candidate vacci*':ti,ab OR nimenrix:ti,ab OR nonamen:ti,ab OR 'tetramen-t':ti,ab OR trumenba:ti,ab OR 'va mengoc bc':ti,ab                                                                                                                                                                                                                                                                                                                                                                                                                                                                                                                                                                                                        |
| #5                 | #3 OR #4                                                                                                                                                                                                                                                                                                                                                                                                                                                                                                                                                                                                                                                                                                                                                                                                                                                                                                                                                                                                                                                                                                                                                                                                                                                                                                                                                               |
| #6                 | 'health equity'/exp OR 'health care disparity'/exp OR 'health disparity'/exp OR ((health* NEAR/3 (disparit* OR inequalit* OR inequit* OR equit* OR equalit*)):ti,ab)                                                                                                                                                                                                                                                                                                                                                                                                                                                                                                                                                                                                                                                                                                                                                                                                                                                                                                                                                                                                                                                                                                                                                                                                   |
| #7                 | #5 AND #6                                                                                                                                                                                                                                                                                                                                                                                                                                                                                                                                                                                                                                                                                                                                                                                                                                                                                                                                                                                                                                                                                                                                                                                                                                                                                                                                                              |
| #8                 | 'minority health'/exp OR 'vulnerable population'/exp OR 'ethnic group'/exp OR 'social hierarchy'/exp OR 'social exclusion'/exp OR 'social vulnerability'/de OR 'social determinants of health'/exp OR 'minority health':ti,ab OR vulnerable*:ti,ab OR disadvantaged:ti,ab OR 'under served':ti,ab OR underserved:ti,ab OR neglect*:ti,ab OR marginal*:ti,ab OR 'socially excluded':ti,ab OR 'social deprivation':ti,ab OR 'social disparit*':ti,ab OR 'social determinant*':ti,ab OR 'social inequit*':ti,ab OR 'racial disparit*':ti,ab OR 'racial inequit*':ti,ab OR 'racial equalit*':ti,ab OR 'racial equity':ti,ab OR 'ethnic disparit*':ti,ab OR (((ethnic* OR minorit* OR race* OR racial) NEAR/3 (background OR communit* OR group* OR population*)):ti,ab) OR (('high risk' NEAR/3 (communit* OR group* OR population* OR people OR person*)):ti,ab) OR 'black person'/exp OR 'african american*':ti,ab OR 'african ancestry':ti,ab OR aian:ti,ab OR 'american indian'/exp OR 'asian continental ancestry group'/exp OR asian*:ti,ab OR black*:ti,ab OR caucasian*:ti,ab OR ghetto*:ti,ab OR hispanic*:ti,ab OR indian*:ti,ab OR latino*:ti,ab OR latina*:ti,ab OR 'native american*':ti,ab OR 'oceanic ancestry group'/exp OR 'pacific islander*':ti,ab OR 'people of color':ti,ab OR 'people of colour':ti,ab OR slum*:ti,ab OR white:ti,ab OR whites:ti,ab |
| #9                 | #5 AND #8                                                                                                                                                                                                                                                                                                                                                                                                                                                                                                                                                                                                                                                                                                                                                                                                                                                                                                                                                                                                                                                                                                                                                                                                                                                                                                                                                              |
| #10                | 'migrant'/exp OR emigrant*:ti,ab OR immigrant*:ti,ab OR migrant*:ti,ab OR 'refugee'/exp OR refugee*:ti,ab OR 'asylum seeker*':ti,ab OR 'displaced person*':ti,ab                                                                                                                                                                                                                                                                                                                                                                                                                                                                                                                                                                                                                                                                                                                                                                                                                                                                                                                                                                                                                                                                                                                                                                                                       |
| #11                | #5 AND #10                                                                                                                                                                                                                                                                                                                                                                                                                                                                                                                                                                                                                                                                                                                                                                                                                                                                                                                                                                                                                                                                                                                                                                                                                                                                                                                                                             |

| Search No. | Search Terms                                                                                                                                                                                                                                                                                                                                                                                                                                                                                                                                                                                                                    |
|------------|---------------------------------------------------------------------------------------------------------------------------------------------------------------------------------------------------------------------------------------------------------------------------------------------------------------------------------------------------------------------------------------------------------------------------------------------------------------------------------------------------------------------------------------------------------------------------------------------------------------------------------|
| #12        | 'poverty'/exp OR 'health care planning'/exp/mj OR 'socioeconomics'/exp/mj OR poverty:ti,ab OR 'low income*':ti,ab OR 'middle income*':ti,ab OR 'low resource*':ti,ab OR impoverish:ti,ab OR indigence:ti,ab OR indigency:ti,ab OR 'homeless person'/exp OR homeless:ti,ab OR jobless:ti,ab OR 'job seek*':ti,ab OR 'single parent*':ti,ab OR 'single mother*':ti,ab OR 'lone parent*':ti,ab OR 'health insurance status':ti,ab OR (('socio economic*' NEAR/3 (inequalit* OR unequal* OR inequit* OR disparit* OR imparit* OR discrepant* OR imbalance* OR factor*)):ti,ab)                                                      |
| #13        | #5 AND #12                                                                                                                                                                                                                                                                                                                                                                                                                                                                                                                                                                                                                      |
| #14        | 'sexual and gender minority'/exp OR (((sexual OR gender) NEAR/2 minorit*):ti,ab) OR homosexual*:ti,ab OR 'homo sexual*':ti,ab OR bisexual*:ti,ab OR gay:ti,ab OR gays:ti,ab OR lesbian*:ti,ab OR pansexual*:ti,ab OR queer*:ti,ab OR asexual*:ti,ab OR transgender*:ti,ab OR transsexual*:ti,ab OR intersex*:ti,ab OR 'gender-expansive':ti,ab OR lgbt*:ti,ab OR glbt*:ti,ab OR '2 spirit*':ti,ab OR 'gender diverse':ti,ab OR 'gender fluid*':ti,ab OR 'non binary':ti,ab OR 'men who have sex with men':ti,ab                                                                                                                 |
| #15        | #5 AND #14                                                                                                                                                                                                                                                                                                                                                                                                                                                                                                                                                                                                                      |
| #16        | 'sociodemographics'/exp OR 'community resource'/exp OR 'health care access'/exp OR 'health service'/de OR 'indigenous health care'/exp OR 'rural health'/exp OR 'rural health care'/exp OR 'urban health'/exp OR 'rural population'/exp OR 'urban population'/exp OR (((geographic OR regional OR urban OR rural OR demographic OR cultural) NEAR/4 (inequalit* OR unequal* OR inequit* OR disparit* OR imparit* OR discrepant* OR imbalance* OR barrier* OR facilitat* OR motivat*)):ti,ab) OR 'rural area*':ti,ab OR 'rural population*':ti,ab OR 'rural health*':ti,ab OR 'urban health*':ti,ab OR 'urban population*':ti,ab |
| #17        | #5 AND #16                                                                                                                                                                                                                                                                                                                                                                                                                                                                                                                                                                                                                      |
| #18        | ((improv* OR enhanc* OR encourag* OR increas* OR support* OR assist* OR maxim* OR promot* OR facilitat*) NEAR/3 (uptake OR cover* OR acceptanc* OR complianc* OR complet* OR acceptab* OR adoption OR rate* OR access OR equit* OR equalit*)):ti,ab                                                                                                                                                                                                                                                                                                                                                                             |
| #19        | #5 AND #18                                                                                                                                                                                                                                                                                                                                                                                                                                                                                                                                                                                                                      |
| #20        | ((decreas* OR reduc* OR minimi* OR detect* OR chang*) NEAR/3 (inequalit* OR unequal* OR inequit* OR disparit* OR imparit* OR discrepant* OR imbalance*)):ti,ab                                                                                                                                                                                                                                                                                                                                                                                                                                                                  |
| #21        | #5 AND #20                                                                                                                                                                                                                                                                                                                                                                                                                                                                                                                                                                                                                      |
| #22        | 'anti-vaccination movement'/exp OR 'anti-vaccination':ti,ab OR 'anti-vac':ti,ab OR 'anti-vaccine*':ti,ab OR 'anti-vax*':ti,ab OR antivaccinal:ti,ab OR antivaccination:ti,ab OR antivaccine*:ti,ab OR antivax*:ti,ab                                                                                                                                                                                                                                                                                                                                                                                                            |
| #23        | #5 AND #22                                                                                                                                                                                                                                                                                                                                                                                                                                                                                                                                                                                                                      |
| #24        | 'vaccine hesitancy'/exp OR (((vaccin* OR immuni*) NEAR/3 (hesitan* OR refus* OR delay* OR barrier* OR obstacle* OR restrict* OR obstruct* OR impede* OR restrain* OR constrain* OR inhibit*)):ti,ab)                                                                                                                                                                                                                                                                                                                                                                                                                            |
| #25        | #5 AND #24                                                                                                                                                                                                                                                                                                                                                                                                                                                                                                                                                                                                                      |
| #26        | 'health promotion'/exp OR (((vaccin* OR immuni*) NEAR/3 (equit* OR confidence OR complet* OR compliance OR comply OR complie* OR adher* OR access* OR facilitat* OR uptake OR 'up take' OR 'take up' OR improve* OR enhance* OR encourag* OR support* OR promot* OR optimiz* OR optimis* OR motivat* OR accept* OR incentive* OR attend* OR adopt* OR persuad* OR persuasion OR attitud* OR know* OR awareness* OR affordab*)):ti,ab)                                                                                                                                                                                           |
| #27        | #5 AND #26                                                                                                                                                                                                                                                                                                                                                                                                                                                                                                                                                                                                                      |
| #28        | 'personnel management'/exp OR 'reimbursement'/exp OR 'clinical audit'/exp OR 'incentive plan*':ti,ab OR reimbursement*:ti,ab OR 'medical audit*':ti,ab OR 'clinical audit*':ti,ab OR (((pediatric* OR parent* OR gp OR 'general practic*' OR physician* OR doctor* OR clinician* OR 'nurse practitioner*' OR midwife OR midwives) NEAR/3 (attitud* OR know* OR awareness*)):ti,ab) OR (((vaccin* OR                                                                                                                                                                                                                             |

| Search No.   | Search Terms                                                                                                                                                                                                                                                                                                                                                                                                                                                                                                                                                                                                                                                                                                                                                                                                                                                                                                                                                                                                                                                                                                                                                                                                                                                                                                                                                                                                                                                                                                                                                                                                         |
|--------------|----------------------------------------------------------------------------------------------------------------------------------------------------------------------------------------------------------------------------------------------------------------------------------------------------------------------------------------------------------------------------------------------------------------------------------------------------------------------------------------------------------------------------------------------------------------------------------------------------------------------------------------------------------------------------------------------------------------------------------------------------------------------------------------------------------------------------------------------------------------------------------------------------------------------------------------------------------------------------------------------------------------------------------------------------------------------------------------------------------------------------------------------------------------------------------------------------------------------------------------------------------------------------------------------------------------------------------------------------------------------------------------------------------------------------------------------------------------------------------------------------------------------------------------------------------------------------------------------------------------------|
|              | immuni* OR parent* OR household* OR 'house-hold*' OR clinical) NEAR/3 'decision making'):ti,ab)                                                                                                                                                                                                                                                                                                                                                                                                                                                                                                                                                                                                                                                                                                                                                                                                                                                                                                                                                                                                                                                                                                                                                                                                                                                                                                                                                                                                                                                                                                                      |
| #29          | #5 AND #28                                                                                                                                                                                                                                                                                                                                                                                                                                                                                                                                                                                                                                                                                                                                                                                                                                                                                                                                                                                                                                                                                                                                                                                                                                                                                                                                                                                                                                                                                                                                                                                                           |
| #30          | 'health behavior'/exp OR 'unsafe sex'/exp OR (((unprotect* OR condomless OR risk OR 'high-risk' OR unsafe) NEAR/3 (sex* OR intercourse*)):ti,ab) OR ((sex* NEAR/2 (behavior* OR behaviour*)):ti,ab)                                                                                                                                                                                                                                                                                                                                                                                                                                                                                                                                                                                                                                                                                                                                                                                                                                                                                                                                                                                                                                                                                                                                                                                                                                                                                                                                                                                                                  |
| #31          | #5 AND #30                                                                                                                                                                                                                                                                                                                                                                                                                                                                                                                                                                                                                                                                                                                                                                                                                                                                                                                                                                                                                                                                                                                                                                                                                                                                                                                                                                                                                                                                                                                                                                                                           |
| #32          | 'alcoholism'/exp OR alcoholism:ti,ab OR ((alcohol* NEAR/2 (dependenc* OR addiction* OR abuse OR intoxication* OR use*)):ti,ab)                                                                                                                                                                                                                                                                                                                                                                                                                                                                                                                                                                                                                                                                                                                                                                                                                                                                                                                                                                                                                                                                                                                                                                                                                                                                                                                                                                                                                                                                                       |
| #33          | #5 AND #32                                                                                                                                                                                                                                                                                                                                                                                                                                                                                                                                                                                                                                                                                                                                                                                                                                                                                                                                                                                                                                                                                                                                                                                                                                                                                                                                                                                                                                                                                                                                                                                                           |
| #34          | 'drug misuse'/exp OR 'illicit drug'/exp OR (((drug* OR substance* OR 'non prescription*' OR nonprescription*) NEAR/2 (misuse OR abuse OR addiction* OR dependenc* OR use*)):ti,ab)                                                                                                                                                                                                                                                                                                                                                                                                                                                                                                                                                                                                                                                                                                                                                                                                                                                                                                                                                                                                                                                                                                                                                                                                                                                                                                                                                                                                                                   |
| #35          | #5 AND #34                                                                                                                                                                                                                                                                                                                                                                                                                                                                                                                                                                                                                                                                                                                                                                                                                                                                                                                                                                                                                                                                                                                                                                                                                                                                                                                                                                                                                                                                                                                                                                                                           |
| #36          | 'smoking'/exp OR smoking:ti,ab OR smoker*:ti,ab                                                                                                                                                                                                                                                                                                                                                                                                                                                                                                                                                                                                                                                                                                                                                                                                                                                                                                                                                                                                                                                                                                                                                                                                                                                                                                                                                                                                                                                                                                                                                                      |
| #37          | #5 AND #36                                                                                                                                                                                                                                                                                                                                                                                                                                                                                                                                                                                                                                                                                                                                                                                                                                                                                                                                                                                                                                                                                                                                                                                                                                                                                                                                                                                                                                                                                                                                                                                                           |
| #38          | 'religion'/exp OR religion*:ti,ab OR religious:ti,ab OR prayer*:ti,ab OR spirituality:ti,ab OR theology:ti,ab OR mysticism:ti,ab OR buddhism:ti,ab OR christian*:ti,ab OR confucianism:ti,ab OR hinduism:ti,ab OR islam*:ti,ab OR judaism:ti,ab OR mormonism:ti,ab OR shamanism:ti,ab OR taoism:ti,ab                                                                                                                                                                                                                                                                                                                                                                                                                                                                                                                                                                                                                                                                                                                                                                                                                                                                                                                                                                                                                                                                                                                                                                                                                                                                                                                |
| #39          | #5 AND #38                                                                                                                                                                                                                                                                                                                                                                                                                                                                                                                                                                                                                                                                                                                                                                                                                                                                                                                                                                                                                                                                                                                                                                                                                                                                                                                                                                                                                                                                                                                                                                                                           |
| #40          | 'educational status'/exp OR ((educational NEAR/3 status):ti,ab) OR literacy:ti,ab OR illiteracy:ti,ab OR ((academic NEAR/2 fail*):ti,ab)                                                                                                                                                                                                                                                                                                                                                                                                                                                                                                                                                                                                                                                                                                                                                                                                                                                                                                                                                                                                                                                                                                                                                                                                                                                                                                                                                                                                                                                                             |
| #41          | #5 AND #40                                                                                                                                                                                                                                                                                                                                                                                                                                                                                                                                                                                                                                                                                                                                                                                                                                                                                                                                                                                                                                                                                                                                                                                                                                                                                                                                                                                                                                                                                                                                                                                                           |
| #42          | 'social justice'/exp OR 'social value'/exp OR 'resource allocation'/exp OR equity:ti,ab OR 'health priorit*':ti,ab OR 'health care rationing':ti,ab                                                                                                                                                                                                                                                                                                                                                                                                                                                                                                                                                                                                                                                                                                                                                                                                                                                                                                                                                                                                                                                                                                                                                                                                                                                                                                                                                                                                                                                                  |
| #43          | #5 AND #42                                                                                                                                                                                                                                                                                                                                                                                                                                                                                                                                                                                                                                                                                                                                                                                                                                                                                                                                                                                                                                                                                                                                                                                                                                                                                                                                                                                                                                                                                                                                                                                                           |
| #44          | #7 OR #9 OR #11 OR #13 OR #15 OR #17 OR #19 OR #21 OR #23 OR #25 OR #27 OR #29 OR #31 OR #33 OR #35 OR #37 OR #39 OR #41 OR #43                                                                                                                                                                                                                                                                                                                                                                                                                                                                                                                                                                                                                                                                                                                                                                                                                                                                                                                                                                                                                                                                                                                                                                                                                                                                                                                                                                                                                                                                                      |
| #45          | 'animal'/exp NOT 'human'/exp OR 'experimental animal'/exp OR 'animal experiment'/exp OR 'animal model'/exp OR 'rodent'/exp OR rat:ti OR rats:ti OR mouse:ti OR mice:ti                                                                                                                                                                                                                                                                                                                                                                                                                                                                                                                                                                                                                                                                                                                                                                                                                                                                                                                                                                                                                                                                                                                                                                                                                                                                                                                                                                                                                                               |
| #46          | [editorial]/lim OR [letter]/lim OR 'case report'/exp OR letter:ti OR comment*:ti                                                                                                                                                                                                                                                                                                                                                                                                                                                                                                                                                                                                                                                                                                                                                                                                                                                                                                                                                                                                                                                                                                                                                                                                                                                                                                                                                                                                                                                                                                                                     |
| <b>Total</b> |                                                                                                                                                                                                                                                                                                                                                                                                                                                                                                                                                                                                                                                                                                                                                                                                                                                                                                                                                                                                                                                                                                                                                                                                                                                                                                                                                                                                                                                                                                                                                                                                                      |
| #47          | #44 NOT (#45 OR #46)                                                                                                                                                                                                                                                                                                                                                                                                                                                                                                                                                                                                                                                                                                                                                                                                                                                                                                                                                                                                                                                                                                                                                                                                                                                                                                                                                                                                                                                                                                                                                                                                 |
| #48          | #44 NOT (#45 OR #46) AND [english]/lim AND [embase]/lim                                                                                                                                                                                                                                                                                                                                                                                                                                                                                                                                                                                                                                                                                                                                                                                                                                                                                                                                                                                                                                                                                                                                                                                                                                                                                                                                                                                                                                                                                                                                                              |
| #49          | 'united states'/exp OR 'united states':ti,ab OR usa:ti,ab OR 'u.s.a.':ti,ab OR 'u.s.':ti,ab OR 'united states':ad OR 'usa':ad OR 'u.s.a.':ad OR 'u.s.':ad OR 'us':ad OR alabama:ad OR alaska:ad OR arizona:ad OR arkansas:ad OR california:ad OR colorado:ad OR connecticut:ad OR delaware:ad OR florida:ad OR georgia:ad OR hawaii:ad OR idaho:ad OR illinois:ad OR indiana:ad OR iowa:ad OR kansas:ad OR kentucky:ad OR louisiana:ad OR maine:ad OR maryland:ad OR massachusetts:ad OR michigan:ad OR minnesota:ad OR mississippi:ad OR missouri:ad OR montana:ad OR nebraska:ad OR nevada:ad OR new hampshire:ad OR 'new jersey':ad OR 'new mexico':ad OR 'new york':ad OR 'north carolina':ad OR 'north dakota':ad OR ohio:ad OR oklahoma:ad OR oregon:ad OR pennsylvania:ad OR 'rhode island':ad OR 'south carolina':ad OR 'south dakota':ad OR tennessee:ad OR texas:ad OR utah:ad OR vermont:ad OR virginia:ad OR washington:ad OR 'west virginia':ad OR wisconsin:ad OR wyoming:ad OR 'puerto rico':ad OR alabama:de,ab,ti OR alaska:de,ab,ti OR arizona:de,ab,ti OR arkansas:de,ab,ti OR california:de,ab,ti OR colorado:de,ab,ti OR connecticut:de,ab,ti OR delaware:de,ab,ti OR florida:de,ab,ti OR georgia:de,ab,ti OR hawaii:de,ab,ti OR idaho:de,ab,ti OR illinois:de,ab,ti OR indiana:de,ab,ti OR iowa:de,ab,ti OR kansas:de,ab,ti OR kentucky:de,ab,ti OR louisiana:de,ab,ti OR maine:de,ab,ti OR maryland:de,ab,ti OR massachusetts:de,ab,ti OR michigan:de,ab,ti OR minnesota:de,ab,ti OR mississippi:de,ab,ti OR missouri:de,ab,ti OR montana:de,ab,ti OR nebraska:de,ab,ti OR nevada:de,ab,ti OR |

| Search No. | Search Terms                                                                                                                                                                                                                                                                                                                                                                                                                                                                                                                                            |
|------------|---------------------------------------------------------------------------------------------------------------------------------------------------------------------------------------------------------------------------------------------------------------------------------------------------------------------------------------------------------------------------------------------------------------------------------------------------------------------------------------------------------------------------------------------------------|
|            | 'new hampshire':de,ab,ti OR 'new jersey':de,ab,ti OR 'new mexico':de,ab,ti OR 'new york':de,ab,ti OR 'north carolina':de,ab,ti OR 'north dakota':de,ab,ti OR ohio:de,ab,ti OR oklahoma:de,ab,ti OR oregon:de,ab,ti OR pennsylvania:de,ab,ti OR 'rhode island':de,ab,ti OR 'south carolina':de,ab,ti OR 'south dakota':de,ab,ti OR tennessee:de,ab,ti OR texas:de,ab,ti OR utah:de,ab,ti OR vermont:de,ab,ti OR virginia:de,ab,ti OR washington:de,ab,ti OR 'west virginia':de,ab,ti OR wisconsin:de,ab,ti OR wyoming:de,ab,ti OR 'puerto rico':de,ab,ti |
| #50        | #48 AND #49                                                                                                                                                                                                                                                                                                                                                                                                                                                                                                                                             |
| #51        | #50 NOT ([conference abstract]/lim OR [conference paper]/lim OR [conference review]/lim)                                                                                                                                                                                                                                                                                                                                                                                                                                                                |
| #52        | #50 AND ([conference abstract]/lim OR [conference paper]/lim OR [conference review]/lim) AND [2020-2022]/py                                                                                                                                                                                                                                                                                                                                                                                                                                             |

**Table S-1c. Cochrane Search Strategy (Conducted 10 June 2022)**

**Limits: Humans; English; No Comments, letters, editorials, case reports or conference abstracts. US only**

| Search No.         | Search Terms                                                                                                                                                                                                                                                                                                                                                                                                                                                                                                                                                                                                                                                                                                                                                                                                                                                                                                                                                                                                                                                                                                                                                                                                                                                                                                                                                                                                                                                                                                                                                              |
|--------------------|---------------------------------------------------------------------------------------------------------------------------------------------------------------------------------------------------------------------------------------------------------------------------------------------------------------------------------------------------------------------------------------------------------------------------------------------------------------------------------------------------------------------------------------------------------------------------------------------------------------------------------------------------------------------------------------------------------------------------------------------------------------------------------------------------------------------------------------------------------------------------------------------------------------------------------------------------------------------------------------------------------------------------------------------------------------------------------------------------------------------------------------------------------------------------------------------------------------------------------------------------------------------------------------------------------------------------------------------------------------------------------------------------------------------------------------------------------------------------------------------------------------------------------------------------------------------------|
| <b>Disease</b>     |                                                                                                                                                                                                                                                                                                                                                                                                                                                                                                                                                                                                                                                                                                                                                                                                                                                                                                                                                                                                                                                                                                                                                                                                                                                                                                                                                                                                                                                                                                                                                                           |
| #1                 | [mh "Meningococcal Infections"] OR [mh "Neisseria meningitidis"] OR meningiti*:ti,ab OR meningococc*:ti,ab OR "Micrococcus intracellularis":ti,ab OR "Neisseria weichselbaumi":ti,ab OR IMD:ti,ab                                                                                                                                                                                                                                                                                                                                                                                                                                                                                                                                                                                                                                                                                                                                                                                                                                                                                                                                                                                                                                                                                                                                                                                                                                                                                                                                                                         |
| <b>Vaccination</b> |                                                                                                                                                                                                                                                                                                                                                                                                                                                                                                                                                                                                                                                                                                                                                                                                                                                                                                                                                                                                                                                                                                                                                                                                                                                                                                                                                                                                                                                                                                                                                                           |
| #2                 | [mh Vaccination] OR [mh ^Vaccines] OR [mh Immunization] OR [mh "Immunization Programs"] OR vaccin*:ti,ab OR immuni*:ti,ab                                                                                                                                                                                                                                                                                                                                                                                                                                                                                                                                                                                                                                                                                                                                                                                                                                                                                                                                                                                                                                                                                                                                                                                                                                                                                                                                                                                                                                                 |
| #3                 | #1 AND #2                                                                                                                                                                                                                                                                                                                                                                                                                                                                                                                                                                                                                                                                                                                                                                                                                                                                                                                                                                                                                                                                                                                                                                                                                                                                                                                                                                                                                                                                                                                                                                 |
| #4                 | [mh "Meningococcal Vaccines"] OR "acwy vax":ti,ab OR (meningococcal NEXT vacci*):ti,ab OR (antimeningococcal NEXT vacci*):ti,ab OR bexsero:ti,ab OR ("mc 4" NEXT vacci*):ti,ab OR (mc4 NEXT vacci*):ti,ab OR ("MCP CRM197 conjugate" NEXT vacci*):ti,ab OR "men quad tt":ti,ab OR menactra:ti,ab OR menacwy:ti,ab OR menafriavac:ti,ab OR menbvax:ti,ab OR mencevax:ti,ab OR meningitec:ti,ab OR (meningoccal NEXT vacci*):ti,ab OR ("meningococcal group B" NEXT vacci*):ti,ab OR (meningococcus NEXT vacci*):ti,ab OR meninvact:ti,ab OR menjugate:ti,ab OR menomune:ti,ab OR menpovax:ti,ab OR menquadfi:ti,ab OR menveo:ti,ab OR menzb:ti,ab OR "neisvac c":ti,ab OR ("New Zealand candidate" NEXT vacci*):ti,ab OR nimenrix:ti,ab OR nonamen:ti,ab OR "tetramen t":ti,ab OR trumenba:ti,ab OR "va mengoc bc":ti,ab                                                                                                                                                                                                                                                                                                                                                                                                                                                                                                                                                                                                                                                                                                                                                   |
| #5                 | #3 OR #4                                                                                                                                                                                                                                                                                                                                                                                                                                                                                                                                                                                                                                                                                                                                                                                                                                                                                                                                                                                                                                                                                                                                                                                                                                                                                                                                                                                                                                                                                                                                                                  |
| #6                 | [mh "Health Equity"] OR [mh "Healthcare Disparities"] OR [mh "Health Status Disparities"] OR (health* NEAR/3 (disparit* or inequalit* or inequit* or equit* or equalit*)):ti,ab                                                                                                                                                                                                                                                                                                                                                                                                                                                                                                                                                                                                                                                                                                                                                                                                                                                                                                                                                                                                                                                                                                                                                                                                                                                                                                                                                                                           |
| #7                 | #5 AND #6                                                                                                                                                                                                                                                                                                                                                                                                                                                                                                                                                                                                                                                                                                                                                                                                                                                                                                                                                                                                                                                                                                                                                                                                                                                                                                                                                                                                                                                                                                                                                                 |
| #8                 | [mh "Minority Health"] OR [mh "health disparity, minority and vulnerable populations"] OR [mh "ethnic and racial minorities"] OR [mh "hierarchy, social"] OR [mh "social marginalization"] OR [mh "social vulnerability"] OR [mh "Social Determinants of Health"] OR "Minority Health":ti,ab OR vulnerable*:ti,ab OR disadvantaged:ti,ab OR "under served":ti,ab OR underserved:ti,ab OR neglect*:ti,ab OR marginal*:ti,ab OR "socially excluded":ti,ab OR "social deprivation":ti,ab OR (social NEXT disparit*):ti,ab OR (social NEXT determinant*):ti,ab OR (social NEXT inequit*):ti,ab OR (racial NEXT disparit*):ti,ab OR (racial NEXT inequit*):ti,ab OR (racial NEXT equalit*):ti,ab OR (racial NEXT equity:ti,ab) OR (ethnic NEXT disparit*):ti,ab OR ((ethnic* OR minorit* OR race* OR racial) NEAR/3 (background OR communit* OR group* OR population*)):ti,ab OR ("high risk" NEAR/3 (communit* OR group* OR population* OR people OR person*)):ti,ab OR [mh "African Americans"] OR (african NEXT american*):ti,ab OR "african ancestry":ti,ab OR [mh "African Continental Ancestry Group"] OR aian:ti,ab OR [mh "American Native Continental Ancestry Group"] OR [mh "Asian Continental Ancestry Group"] OR asian*:ti,ab OR black*:ti,ab OR caucasian*:ti,ab OR ghetto*:ti,ab OR hispanic*:ti,ab OR indian*:ti,ab OR latino*:ti,ab OR latina*:ti,ab OR (native NEXT american*):ti,ab OR [mh "oceanic ancestry group"] OR (pacific NEXT islander*):ti,ab OR "people of color":ti,ab OR "people of colour":ti,ab OR slum*:ti,ab OR white:ti,ab OR whites:ti,ab |
| #9                 | #5 AND #8                                                                                                                                                                                                                                                                                                                                                                                                                                                                                                                                                                                                                                                                                                                                                                                                                                                                                                                                                                                                                                                                                                                                                                                                                                                                                                                                                                                                                                                                                                                                                                 |
| #10                | [mh "Emigrants and Immigrants"] OR emigrant*:ti,ab OR Immigrant*:ti,ab OR migrant*:ti,ab OR [mh Refugees] OR refugee*:ti,ab OR (Asylum NEXT Seeker*):ti,ab OR (displaced NEXT person*):ti,ab                                                                                                                                                                                                                                                                                                                                                                                                                                                                                                                                                                                                                                                                                                                                                                                                                                                                                                                                                                                                                                                                                                                                                                                                                                                                                                                                                                              |
| #11                | #5 AND #10                                                                                                                                                                                                                                                                                                                                                                                                                                                                                                                                                                                                                                                                                                                                                                                                                                                                                                                                                                                                                                                                                                                                                                                                                                                                                                                                                                                                                                                                                                                                                                |
| #12                | [mh Poverty] OR [mh "poverty area"] OR [mh "Medically Underserved Area"] OR [mh "socioeconomic factors"] OR poverty:ti,ab OR (low NEXT income*):ti,ab OR                                                                                                                                                                                                                                                                                                                                                                                                                                                                                                                                                                                                                                                                                                                                                                                                                                                                                                                                                                                                                                                                                                                                                                                                                                                                                                                                                                                                                  |

| Search No. | Search Terms                                                                                                                                                                                                                                                                                                                                                                                                                                                                                                                                                                                                                                                                                                                                    |
|------------|-------------------------------------------------------------------------------------------------------------------------------------------------------------------------------------------------------------------------------------------------------------------------------------------------------------------------------------------------------------------------------------------------------------------------------------------------------------------------------------------------------------------------------------------------------------------------------------------------------------------------------------------------------------------------------------------------------------------------------------------------|
|            | (middle NEXT income*):ti,ab OR (low NEXT resource*):ti,ab OR impoverish:ti,ab OR indigence:ti,ab OR indigency:ti,ab OR [mh "Homeless Persons"] OR homeless:ti,ab OR jobless:ti,ab OR (job NEXT seek*):ti,ab OR (single NEXT parent*):ti,ab OR (single NEXT mother*):ti,ab OR (lone NEXT parent*):ti,ab OR "health insurance status":ti,ab OR ((socio NEXT economic*) NEAR/3 (inequalit* OR unequal* OR inequit* OR disparit* OR imparit* OR discrepant* OR imbalance* OR factor*)):ti,ab                                                                                                                                                                                                                                                        |
| #13        | #5 AND #12                                                                                                                                                                                                                                                                                                                                                                                                                                                                                                                                                                                                                                                                                                                                      |
| #14        | [mh "Sexual and Gender Minorities"] OR ((Sexual OR Gender) NEAR/2 Minorit*):ti,ab OR homosexual*:ti,ab OR (homo NEXT sexual*):ti,ab OR bisexual*:ti,ab OR gay:ti,ab OR gays:ti,ab OR lesbian*:ti,ab OR pansexual*:ti,ab OR queer*:ti,ab OR asexual*:ti,ab OR transgender*:ti,ab OR transsexual*:ti,ab OR intersex*:ti,ab OR "gender expansive":ti,ab OR LGBT*:ti,ab OR GLBTI*:ti,ab OR (2 NEXT spirit*):ti,ab OR "gender diverse":ti,ab OR (gender NEXT fluid*):ti,ab OR "non binary":ti,ab OR "men who have sex with men":ti,ab                                                                                                                                                                                                                |
| #15        | #5 AND #14                                                                                                                                                                                                                                                                                                                                                                                                                                                                                                                                                                                                                                                                                                                                      |
| #16        | [mh "sociodemographic factors"] OR [mh "community resources"] OR [mh "Health Services Accessibility"] OR [mh "Health Services Needs and Demand"] OR [mh "health services, indigenous"] OR [mh "rural health"] OR [mh "rural health services"] OR [mh "urban health"] OR [mh "urban health services"] OR [mh "rural population"] OR [mh "urban population"] OR ((geographic OR regional OR urban OR rural OR demographic OR cultural) NEAR/4 (inequalit* OR unequal* OR inequit* OR disparit* OR imparit* OR discrepant* OR imbalance* OR barrier* OR facilitat* OR motivat*)):ti,ab OR (rural NEXT area*):ti,ab OR (rural NEXT population*):ti,ab OR (rural NEXT health*):ti,ab OR (urban NEXT health*):ti,ab OR (urban NEXT population*):ti,ab |
| #17        | #5 AND #16                                                                                                                                                                                                                                                                                                                                                                                                                                                                                                                                                                                                                                                                                                                                      |
| #18        | ((improv* OR enhanc* OR encourag* OR increas* OR support* OR assist* OR maxim* OR promot* OR facilitat*) NEAR/3 (uptake OR cover* OR acceptanc* OR complianc* OR complet* OR acceptab* OR adoption OR rate* OR access OR equit* OR equalit*)):ti,ab                                                                                                                                                                                                                                                                                                                                                                                                                                                                                             |
| #19        | #5 AND #18                                                                                                                                                                                                                                                                                                                                                                                                                                                                                                                                                                                                                                                                                                                                      |
| #20        | ((decreas* OR reduc* OR minimi* OR detect* OR chang*) NEAR/3 (inequalit* OR unequal* OR inequit* OR disparit* OR imparit* OR discrepant* OR imbalance*)):ti,ab                                                                                                                                                                                                                                                                                                                                                                                                                                                                                                                                                                                  |
| #21        | #5 AND #20                                                                                                                                                                                                                                                                                                                                                                                                                                                                                                                                                                                                                                                                                                                                      |
| #22        | [mh "Anti-Vaccination Movement"] OR "Anti Vaccination":ti,ab OR "anti VAC":ti,ab OR "anti vaccine":ti,ab OR (anti NEXT vax*):ti,ab OR antivaccinal:ti,ab OR antivaccination:ti,ab OR antivaccine:ti,ab OR antivax*:ti,ab                                                                                                                                                                                                                                                                                                                                                                                                                                                                                                                        |
| #23        | #5 AND #22                                                                                                                                                                                                                                                                                                                                                                                                                                                                                                                                                                                                                                                                                                                                      |
| #24        | [mh "Vaccination Hesitancy"] OR ((vaccin* OR immuni*) NEAR/3 (hesitan* OR refus* OR delay* OR barrier* OR obstacle* OR restrict* OR obstruct* OR impede* OR restrain* OR constrain* OR inhibit*)):ti,ab                                                                                                                                                                                                                                                                                                                                                                                                                                                                                                                                         |
| #25        | #5 AND #24                                                                                                                                                                                                                                                                                                                                                                                                                                                                                                                                                                                                                                                                                                                                      |
| #26        | [mh "Health Promotion"] OR ((vaccin* OR immuni*) NEAR/3 (equit* OR confidence OR complet* OR compliance OR comply OR complie* OR adher* OR access* OR facilitat* OR uptake OR "up take" OR "take up" OR improve* OR enhance* OR encourag* OR support* OR promot* OR optimiz* OR optimis* OR motivat* OR accept* OR incentive* OR attend* OR adopt* OR persuad* OR persuasion OR attitud* OR know* OR awareness* OR affordab*)):ti,ab                                                                                                                                                                                                                                                                                                            |
| #27        | #5 AND #26                                                                                                                                                                                                                                                                                                                                                                                                                                                                                                                                                                                                                                                                                                                                      |
| #28        | [mh "Physician Incentive Plans"] OR [mh "Reimbursement, Incentive"] OR [mh "Medical Audit"] OR [mh "Clinical Audit"] OR (incentive NEXT plan*):ti,ab OR reimbursement*:ti,ab OR (medical NEXT audit*):ti,ab OR (clinical NEXT audit*):ti,ab OR ((pediatric* OR parent* OR gp OR (general NEXT practic*) OR physician* OR doctor* OR clinician* OR (nurse NEXT practitioner*) OR midwife OR                                                                                                                                                                                                                                                                                                                                                      |

| Search No.   | Search Terms                                                                                                                                                                                                                                                                                                                                                                                                                                                                                                                                                                                                                                                                                                                                                               |
|--------------|----------------------------------------------------------------------------------------------------------------------------------------------------------------------------------------------------------------------------------------------------------------------------------------------------------------------------------------------------------------------------------------------------------------------------------------------------------------------------------------------------------------------------------------------------------------------------------------------------------------------------------------------------------------------------------------------------------------------------------------------------------------------------|
|              | midwives) NEAR/3 (attitud* OR know* OR awareness*)):ti,ab OR ((vaccin* OR immun* OR parent* OR household* OR (house NEXT hold*) OR clinical) NEAR/3 "decision making"):ti,ab                                                                                                                                                                                                                                                                                                                                                                                                                                                                                                                                                                                               |
| #29          | #5 AND #28                                                                                                                                                                                                                                                                                                                                                                                                                                                                                                                                                                                                                                                                                                                                                                 |
| #30          | [mh "Health Behavior"] OR [mh "Unsafe Sex"] OR ((unprotect* OR condomless OR risk OR "high risk" OR unsafe) NEAR/3 (sex* OR intercourse*)):ti,ab OR (sex* NEAR/2 (behavior* OR behaviour*)):ti,ab                                                                                                                                                                                                                                                                                                                                                                                                                                                                                                                                                                          |
| #31          | #5 AND #30                                                                                                                                                                                                                                                                                                                                                                                                                                                                                                                                                                                                                                                                                                                                                                 |
| #32          | [mh Alcoholism] OR alcoholism:ti,ab OR (alcohol* NEAR/2 (dependenc* OR addiction* OR abuse OR intoxication* OR use*)):ti,ab                                                                                                                                                                                                                                                                                                                                                                                                                                                                                                                                                                                                                                                |
| #33          | #5 AND #32                                                                                                                                                                                                                                                                                                                                                                                                                                                                                                                                                                                                                                                                                                                                                                 |
| #34          | [mh "Drug Misuse"] OR [mh "illicit drugs"] OR ((drug* OR substance* OR (non NEXT prescription*) OR nonprescription*) NEAR/2 (misuse OR abuse OR addiction* OR dependenc* OR use*)):ti,ab                                                                                                                                                                                                                                                                                                                                                                                                                                                                                                                                                                                   |
| #35          | #5 AND #34                                                                                                                                                                                                                                                                                                                                                                                                                                                                                                                                                                                                                                                                                                                                                                 |
| #36          | [mh smoking] OR smoking:ti,ab OR smoker*:ti,ab                                                                                                                                                                                                                                                                                                                                                                                                                                                                                                                                                                                                                                                                                                                             |
| #37          | #5 AND #36                                                                                                                                                                                                                                                                                                                                                                                                                                                                                                                                                                                                                                                                                                                                                                 |
| #38          | [mh Religion] OR religion*:ti,ab OR religious:ti,ab OR prayer*:ti,ab OR spirituality:ti,ab OR theology:ti,ab OR Mysticism:ti,ab OR buddhism:ti,ab OR christian*:ti,ab OR confucianism:ti,ab OR hinduism:ti,ab OR islam*:ti,ab OR judaism:ti,ab OR mormonism:ti,ab OR shamanism:ti,ab OR taoism:ti,ab                                                                                                                                                                                                                                                                                                                                                                                                                                                                       |
| #39          | #5 AND #38                                                                                                                                                                                                                                                                                                                                                                                                                                                                                                                                                                                                                                                                                                                                                                 |
| #40          | [mh "educational status"] OR (educational NEAR/3 status):ti,ab OR literacy:ti,ab OR illiteracy:ti,ab OR (academic NEAR/2 fail*):ti,ab                                                                                                                                                                                                                                                                                                                                                                                                                                                                                                                                                                                                                                      |
| #41          | #5 AND #40                                                                                                                                                                                                                                                                                                                                                                                                                                                                                                                                                                                                                                                                                                                                                                 |
| #42          | [mh "Social Justice"] OR [mh "Social Values"] OR [mh "Resource Allocation"] OR [mh "Health Care Rationing"] OR [mh "Health Priorities"/ES] OR equity:ti,ab                                                                                                                                                                                                                                                                                                                                                                                                                                                                                                                                                                                                                 |
| #43          | #5 AND #42                                                                                                                                                                                                                                                                                                                                                                                                                                                                                                                                                                                                                                                                                                                                                                 |
| #44          | #7 OR #9 OR #11 OR #13 OR #15 OR #17 OR #19 OR #21 OR #23 OR #25 OR #27 OR #29 OR #31 OR #33 OR #35 OR #37 OR #39 OR #41 OR #43                                                                                                                                                                                                                                                                                                                                                                                                                                                                                                                                                                                                                                            |
| #45          | ([mh animals] NOT [mh humans]) OR [mh "Animals, Laboratory"] OR [mh "Animal Experimentation"] OR [mh "Models, Animal"] OR [mh Rodentia] OR (rat OR rats OR mouse OR mice):ti                                                                                                                                                                                                                                                                                                                                                                                                                                                                                                                                                                                               |
| #46          | (Comment OR letter OR editorial OR "Case Report" OR "conference avstract"):pt OR [mh news] OR [mh "historical article"] OR [mh "Anecdotes as Topic"] OR (letter OR comment*):ti                                                                                                                                                                                                                                                                                                                                                                                                                                                                                                                                                                                            |
| <b>Total</b> |                                                                                                                                                                                                                                                                                                                                                                                                                                                                                                                                                                                                                                                                                                                                                                            |
| #47          | #44 NOT (#45 OR #46)                                                                                                                                                                                                                                                                                                                                                                                                                                                                                                                                                                                                                                                                                                                                                       |
| #48          | [mh "united states"] OR "united states" OR "usa" OR "u.s.a." OR ("u.s." NOT "Non-U.S.") OR alabama OR alaska OR arizona OR arkansas OR california OR colorado OR connecticut OR delaware OR florida OR georgia OR hawaii OR idaho OR illinois OR indiana OR iowa OR kansas OR kentucky OR louisiana OR maine OR maryland OR massachusetts OR michigan OR minnesota OR mississippi OR missouri OR montana OR nebraska OR nevada OR "new hampshire" OR "new jersey" OR "new mexico" OR "new york" OR "north carolina" OR "north dakota" OR ohio OR oklahoma OR oregon OR pennsylvania OR "rhode island" OR "south carolina" OR "south dakota" OR tennessee OR texas OR utah OR vermont OR virginia OR washington OR "west virginia" OR wisconsin OR wyoming OR "puerto rico" |
| #49          | #47 AND #48<br>CDSR 4<br>CENTRAL 77                                                                                                                                                                                                                                                                                                                                                                                                                                                                                                                                                                                                                                                                                                                                        |

**Table S-1d. PsychInfo Search Strategy (Conducted 10 June 2022)**

**Limits: Humans; English; No Comments, letters, editorials or dissertations. US only**

| Search No.         | Search Terms                                                                                                                                                                                                                                                                                                                                                                                                                                                                                                                                                                                                                                                                                                                                                                                                                                                                                                                                                                                                                                                                                                                                                                                                                                                                                                                                                                                                                                                                                                                                                                                  |
|--------------------|-----------------------------------------------------------------------------------------------------------------------------------------------------------------------------------------------------------------------------------------------------------------------------------------------------------------------------------------------------------------------------------------------------------------------------------------------------------------------------------------------------------------------------------------------------------------------------------------------------------------------------------------------------------------------------------------------------------------------------------------------------------------------------------------------------------------------------------------------------------------------------------------------------------------------------------------------------------------------------------------------------------------------------------------------------------------------------------------------------------------------------------------------------------------------------------------------------------------------------------------------------------------------------------------------------------------------------------------------------------------------------------------------------------------------------------------------------------------------------------------------------------------------------------------------------------------------------------------------|
| <b>Disease</b>     |                                                                                                                                                                                                                                                                                                                                                                                                                                                                                                                                                                                                                                                                                                                                                                                                                                                                                                                                                                                                                                                                                                                                                                                                                                                                                                                                                                                                                                                                                                                                                                                               |
| S1                 | MA ( Meningococcal Infections OR Neisseria meningitidis ) OR TI ( meningiti* OR meningococc* OR Micrococcus intracellularis OR Neisseria weichselbaumi OR IMD ) OR AB ( meningiti* OR meningococc* OR Micrococcus intracellularis OR Neisseria weichselbaumi OR IMD )                                                                                                                                                                                                                                                                                                                                                                                                                                                                                                                                                                                                                                                                                                                                                                                                                                                                                                                                                                                                                                                                                                                                                                                                                                                                                                                         |
| <b>Vaccination</b> |                                                                                                                                                                                                                                                                                                                                                                                                                                                                                                                                                                                                                                                                                                                                                                                                                                                                                                                                                                                                                                                                                                                                                                                                                                                                                                                                                                                                                                                                                                                                                                                               |
| S2                 | DE ( Vaccination OR Immunization ) OR MA ( Vaccination OR Vaccines OR Immunization OR Immunization Programs ) OR TI ( vaccin* OR immuni* ) OR AB ( vaccin* OR immuni* )                                                                                                                                                                                                                                                                                                                                                                                                                                                                                                                                                                                                                                                                                                                                                                                                                                                                                                                                                                                                                                                                                                                                                                                                                                                                                                                                                                                                                       |
| S3                 | S1 AND S2                                                                                                                                                                                                                                                                                                                                                                                                                                                                                                                                                                                                                                                                                                                                                                                                                                                                                                                                                                                                                                                                                                                                                                                                                                                                                                                                                                                                                                                                                                                                                                                     |
| S4                 | MA Meningococcal Vaccines OR TI ( acwy vax OR meningococcal vacci* OR antimeningococcal vacci* OR bexsero OR mc 4 vacci* OR mc4 vacci* OR MCP CRM197 conjugate vacci* OR men quad tt OR menactra OR menacwy OR menafrivac OR menbvax OR mencevax OR meningitec OR meningoccal vacci* OR meningococcal group B vacci* OR meningococcus vacci* OR meninvact OR menjugate OR menomune OR menpovax OR menquadfi OR menveo OR menzb OR neisvac c OR New Zealand candidate vacci* OR nimenrix OR nonamen OR tetramen-t OR trumenba OR va mengoc bc ) OR AB ( acwy vax OR meningococcal vacci* OR antimeningococcal vacci* OR bexsero OR mc 4 vacci* OR mc4 vacci* OR MCP CRM197 conjugate vacci* OR men quad tt OR menactra OR menacwy OR menafrivac OR menbvax OR mencevax OR meningitec OR meningoccal vacci* OR meningococcal group B vacci* OR meningococcus vacci* OR meninvact OR menjugate OR menomune OR menpovax OR menquadfi OR menveo OR menzb OR neisvac c OR New Zealand candidate vacci* OR nimenrix OR nonamen OR tetramen-t OR trumenba OR va mengoc bc )                                                                                                                                                                                                                                                                                                                                                                                                                                                                                                                           |
| S5                 | S3 OR S4                                                                                                                                                                                                                                                                                                                                                                                                                                                                                                                                                                                                                                                                                                                                                                                                                                                                                                                                                                                                                                                                                                                                                                                                                                                                                                                                                                                                                                                                                                                                                                                      |
| S6                 | DE Health Disparities OR MA ( Health Equity OR Healthcare Disparities OR Health Status Disparities ) OR TI ( (health* N3 (disparit* or inequalit* or inequit* or equit* or equalit*)) ) OR AB ( (health* N3 (disparit* or inequalit* or inequit* or equit* or equalit*)) )                                                                                                                                                                                                                                                                                                                                                                                                                                                                                                                                                                                                                                                                                                                                                                                                                                                                                                                                                                                                                                                                                                                                                                                                                                                                                                                    |
| S7                 | S5 AND S6                                                                                                                                                                                                                                                                                                                                                                                                                                                                                                                                                                                                                                                                                                                                                                                                                                                                                                                                                                                                                                                                                                                                                                                                                                                                                                                                                                                                                                                                                                                                                                                     |
| S8                 | DE ( Minority Groups OR Racial and Ethnic Groups OR Race and Ethnic Discrimination OR At Risk Populations OR Blacks OR African Cultural Groups OR American Indians OR Asians ) OR MA ( Minority Health OR "health disparity, minority and vulnerable populations" OR "ethnic and racial minorities" OR "hierarchy, social" OR social marginalization OR social vulnerability OR "Social Determinants of Health" OR African Americans OR African Continental Ancestry Group OR American Native Continental Ancestry Group OR Asian Continental Ancestry Group OR oceanic ancestry group ) OR TI ( Minority Health OR vulnerable* OR disadvantaged OR under served OR underserved OR neglect* OR marginal* OR socially excluded OR social deprivation OR social disparit* OR social determinant* OR social inequit* OR racial disparit* OR racial inequit* OR racial equalit* OR racial equity OR ethnic disparit* OR ((ethnic* OR minorit* OR race* OR racial) N3 (background OR communit* OR group* OR population*)) OR (high-risk N3 (communit* OR group* OR population* OR people OR person*)) OR african american* OR african ancestry OR aian OR asian* OR black* OR caucasian* OR ghetto* OR hispanic* OR indian* OR latino* OR latina* OR native american* OR pacific islander* OR people of color OR people of colour OR slum* OR white OR whites ) OR AB ( Minority Health OR vulnerable* OR disadvantaged OR under served OR underserved OR neglect* OR marginal* OR socially excluded OR social deprivation OR social disparit* OR social determinant* OR social inequit* OR racial |

| Search No. | Search Terms                                                                                                                                                                                                                                                                                                                                                                                                                                                                                                                                                                                                                                                                                                                                                                                                                                                                                                                                                                                                                                                        |
|------------|---------------------------------------------------------------------------------------------------------------------------------------------------------------------------------------------------------------------------------------------------------------------------------------------------------------------------------------------------------------------------------------------------------------------------------------------------------------------------------------------------------------------------------------------------------------------------------------------------------------------------------------------------------------------------------------------------------------------------------------------------------------------------------------------------------------------------------------------------------------------------------------------------------------------------------------------------------------------------------------------------------------------------------------------------------------------|
|            | disparit* OR racial inequit* OR racial equalit* OR racial equity OR ethnic disparit* OR ((ethnic* OR minorit* OR race* OR racial) N3 (background OR communit* OR group* OR population*)) OR (high-risk N3 (communit* OR group* OR population* OR people OR person*)) OR african american* OR african ancestry OR aian OR asian* OR black* OR caucasian* OR ghetto* OR hispanic* OR indian* OR latino* OR latina* OR native american* OR pacific islander* OR people of color OR people of colour OR slum* OR white OR whites )                                                                                                                                                                                                                                                                                                                                                                                                                                                                                                                                      |
| S9         | S5 AND S8                                                                                                                                                                                                                                                                                                                                                                                                                                                                                                                                                                                                                                                                                                                                                                                                                                                                                                                                                                                                                                                           |
| S10        | DE ( Immigration OR Refugees ) OR MA ( "Emigrants and Immigrants" OR Refugees ) OR TI ( emigrant* OR Immigrant* OR migrant* OR refugee* OR Asylum Seeker* OR displaced person* ) OR AB ( emigrant* OR Immigrant* OR migrant* OR refugee* OR Asylum Seeker* OR displaced person* )                                                                                                                                                                                                                                                                                                                                                                                                                                                                                                                                                                                                                                                                                                                                                                                   |
| S11        | S5 AND S10                                                                                                                                                                                                                                                                                                                                                                                                                                                                                                                                                                                                                                                                                                                                                                                                                                                                                                                                                                                                                                                          |
| S12        | DE ( Poverty OR poverty areas OR Socioeconomic Factors OR Homeless ) OR MA ( Poverty OR poverty area OR Medically Underserved Area OR socioeconomic factors OR Homeless Persons ) OR TI ( poverty OR low income* OR middle income* OR low resource* OR impoverish OR indigence OR indigency OR OR homeless OR jobless OR job seek* OR single parent* OR single mother* OR lone parent* OR health insurance status OR (socio economic* N3 (inequalit* OR unequal* OR inequit* OR disparit* OR imparit* OR discrepant* OR imbalance* OR factor*)) ) OR AB ( poverty OR low income* OR middle income* OR low resource* OR impoverish OR indigence OR indigency OR OR homeless OR jobless OR job seek* OR single parent* OR single mother* OR lone parent* OR health insurance status OR (socio economic* N3 (inequalit* OR unequal* OR inequit* OR disparit* OR imparit* OR discrepant* OR imbalance* OR factor*)) )                                                                                                                                                   |
| S13        | S5 AND S12                                                                                                                                                                                                                                                                                                                                                                                                                                                                                                                                                                                                                                                                                                                                                                                                                                                                                                                                                                                                                                                          |
| S14        | DE Gender Identity OR MA ( "Sexual and Gender Minorities" ) OR TI ( ((Sexual OR Gender) N2 Minorit*) OR homosexual* OR homo sexual* OR bisexual* OR gay OR gays OR lesbian* OR pansexual* OR queer* OR asexual* OR transgender* OR transsexual* OR intersex* OR gender-expansive OR LGBT* OR GLBTI* OR 2 spirit* OR gender diverse OR gender fluid* OR non binary OR men who have sex with men ) OR AB ( ((Sexual OR Gender) N2 Minorit*) OR homosexual* OR homo sexual* OR bisexual* OR gay OR gays OR lesbian* OR pansexual* OR queer* OR asexual* OR transgender* OR transsexual* OR intersex* OR gender-expansive OR LGBT* OR GLBTI* OR 2 spirit* OR gender diverse OR gender fluid* OR non binary OR men who have sex with men )                                                                                                                                                                                                                                                                                                                               |
| S15        | S5 AND S14                                                                                                                                                                                                                                                                                                                                                                                                                                                                                                                                                                                                                                                                                                                                                                                                                                                                                                                                                                                                                                                          |
| S16        | DE ( Demographic Characteristics OR Community Resources OR Health Care Access OR Health Service Needs OR Rural Health OR Urban Health ) OR MA ( sociodemographic factors OR community resources OR Health Services Accessibility OR "Health Services Needs and Demand" OR health services, indigenous OR rural health OR rural health services OR urban health OR urban health services OR rural population OR urban population ) OR TI ( ((geographic OR regional OR urban OR rural OR demographic OR cultural) N4 (inequalit* OR unequal* OR inequit* OR disparit* OR imparit* OR discrepant* OR imbalance* OR barrier* OR facilitat* OR motivat*)) OR rural area* OR rural population* OR rural health* OR urban health* OR urban population* ) OR AB ( ((geographic OR regional OR urban OR rural OR demographic OR cultural) N4 (inequalit* OR unequal* OR inequit* OR disparit* OR imparit* OR discrepant* OR imbalance* OR barrier* OR facilitat* OR motivat*)) OR rural area* OR rural population* OR rural health* OR urban health* OR urban population* ) |
| S17        | S5 AND S16                                                                                                                                                                                                                                                                                                                                                                                                                                                                                                                                                                                                                                                                                                                                                                                                                                                                                                                                                                                                                                                          |
| S18        | TI ( ((improv* OR enhanc* OR encourag* OR increas* OR support* OR assist* OR maxim* OR promot* OR facilitat*) N3 (uptake OR cover* OR acceptanc* OR complianc* OR complet* OR acceptab* OR adoption OR rate* OR access OR equit* OR equalit*)) ) OR AB ( ((improv* OR enhanc* OR encourag* OR increas* OR                                                                                                                                                                                                                                                                                                                                                                                                                                                                                                                                                                                                                                                                                                                                                           |

| Search No. | Search Terms                                                                                                                                                                                                                                                                                                                                                                                                                                                                                                                                                                                                                                                                                                                                                                                                                                                  |
|------------|---------------------------------------------------------------------------------------------------------------------------------------------------------------------------------------------------------------------------------------------------------------------------------------------------------------------------------------------------------------------------------------------------------------------------------------------------------------------------------------------------------------------------------------------------------------------------------------------------------------------------------------------------------------------------------------------------------------------------------------------------------------------------------------------------------------------------------------------------------------|
|            | support* OR assist* OR maxim* OR promot* OR facilitat*) N3 (uptake OR cover* OR acceptanc* OR complianc* OR complet* OR acceptab* OR adoption OR rate* OR access OR equit* OR equalit*)) )                                                                                                                                                                                                                                                                                                                                                                                                                                                                                                                                                                                                                                                                    |
| S19        | S5 AND S18                                                                                                                                                                                                                                                                                                                                                                                                                                                                                                                                                                                                                                                                                                                                                                                                                                                    |
| S20        | TI ( ((decreas* OR reduc* OR minimi* OR detect* OR chang*) N3 (inequalit* OR unequal* OR inequit* OR disparit* OR imparit* OR discrepant* OR imbalance*)) ) OR AB ( ((decreas* OR reduc* OR minimi* OR detect* OR chang*) N3 (inequalit* OR unequal* OR inequit* OR disparit* OR imparit* OR discrepant* OR imbalance*)) )                                                                                                                                                                                                                                                                                                                                                                                                                                                                                                                                    |
| S21        | S5 AND S20                                                                                                                                                                                                                                                                                                                                                                                                                                                                                                                                                                                                                                                                                                                                                                                                                                                    |
| S22        | DE Vaccination Attitudes OR MA Anti-Vaccination Movement OR TI ( Anti-Vaccination OR anti-VAC OR anti-vaccine OR anti-vax* OR antivaccinal OR antivaccination OR antivaccine OR antivax* ) OR AB ( Anti-Vaccination OR anti-VAC OR anti-vaccine OR anti-vax* OR antivaccinal OR antivaccination OR antivaccine OR antivax* )                                                                                                                                                                                                                                                                                                                                                                                                                                                                                                                                  |
| S23        | S5 AND S22                                                                                                                                                                                                                                                                                                                                                                                                                                                                                                                                                                                                                                                                                                                                                                                                                                                    |
| S24        | MA Vaccination Hesitancy OR TI ( ((vaccin* OR immuni*) N3 (hesitan* OR refus* OR delay* OR barrier* OR obstacle* OR restrict* OR obstruct* OR impede* OR restrain* OR constrain* OR inhibit*)) ) OR AB ( ((vaccin* OR immuni*) N3 (hesitan* OR refus* OR delay* OR barrier* OR obstacle* OR restrict* OR obstruct* OR impede* OR restrain* OR constrain* OR inhibit*)) )                                                                                                                                                                                                                                                                                                                                                                                                                                                                                      |
| S25        | S5 AND S24                                                                                                                                                                                                                                                                                                                                                                                                                                                                                                                                                                                                                                                                                                                                                                                                                                                    |
| S26        | DE Health Promotion OR MA Health Promotion OR TI ( ((vaccin* OR immuni*) N3 (equit* OR confidence OR complet* OR compliance OR comply OR complie* OR adher* OR access* OR facilitat* OR uptake OR up take OR take up OR improve* OR enhance* OR encourag* OR support* OR promot* OR optimiz* OR optimis* OR motivat* OR accept* OR incentive* OR attend* OR adopt* OR persuad* OR persuasion OR attitud* OR know* OR awareness* OR affordab*)) ) OR AB ( ((vaccin* OR immuni*) N3 (equit* OR confidence OR complet* OR compliance OR comply OR complie* OR adher* OR access* OR facilitat* OR uptake OR up take OR take up OR improve* OR enhance* OR encourag* OR support* OR promot* OR optimiz* OR optimis* OR motivat* OR accept* OR incentive* OR attend* OR adopt* OR persuad* OR persuasion OR attitud* OR know* OR awareness* OR affordab*)) )        |
| S27        | S5 AND S26                                                                                                                                                                                                                                                                                                                                                                                                                                                                                                                                                                                                                                                                                                                                                                                                                                                    |
| S28        | DE Clinical Audits OR MA ( Physician Incentive Plans OR "Reimbursement, Incentive" OR Medical Audit OR Clinical Audit ) OR TI ( incentive plan* OR reimbursement* OR medical audit* OR clinical audit* OR ((pediatric* OR parent* OR gp OR general practic* OR physician* OR doctor* OR clinician* OR nurse practitioner* OR midwife OR midwives) N3 (attitud* OR know* OR awareness*)) OR ((vaccin* OR immuni* OR parent* OR household* OR house-hold* OR clinical) N3 decision-making) ) OR AB ( incentive plan* OR reimbursement* OR medical audit* OR clinical audit* OR ((pediatric* OR parent* OR gp OR general practic* OR physician* OR doctor* OR clinician* OR nurse practitioner* OR midwife OR midwives) N3 (attitud* OR know* OR awareness*)) OR ((vaccin* OR immuni* OR parent* OR household* OR house-hold* OR clinical) N3 decision-making) ) |
| S29        | S5 AND S28                                                                                                                                                                                                                                                                                                                                                                                                                                                                                                                                                                                                                                                                                                                                                                                                                                                    |
| S30        | DE Health Behavior OR MA ( Health Behavior OR Unsafe Sex ) OR TI ( ((unprotect* OR condomless OR risk OR high-risk OR unsafe) N3 (sex* OR intercourse*)) OR (sex* N2 (behavior* OR behaviour*)) ) OR AB ( ((unprotect* OR condomless OR risk OR high-risk OR unsafe) N3 (sex* OR intercourse*)) OR (sex* N2 (behavior* OR behaviour*)) )                                                                                                                                                                                                                                                                                                                                                                                                                                                                                                                      |
| S31        | S5 AND S30                                                                                                                                                                                                                                                                                                                                                                                                                                                                                                                                                                                                                                                                                                                                                                                                                                                    |
| S32        | DE Alcoholism OR MA Alcoholism OR TI ( alcoholism OR (alcohol* N2 (dependenc* or addiction* or abuse or intoxication* or use*)) ) OR AB ( alcoholism OR (alcohol* N2 (dependenc* or addiction* or abuse or intoxication* or use*)) )                                                                                                                                                                                                                                                                                                                                                                                                                                                                                                                                                                                                                          |
| S33        | S5 AND S32                                                                                                                                                                                                                                                                                                                                                                                                                                                                                                                                                                                                                                                                                                                                                                                                                                                    |

| Search No.   | Search Terms                                                                                                                                                                                                                                                                                                                                                                                                                       |
|--------------|------------------------------------------------------------------------------------------------------------------------------------------------------------------------------------------------------------------------------------------------------------------------------------------------------------------------------------------------------------------------------------------------------------------------------------|
| S34          | DE Drug Abuse OR MA ( Drug Misuse OR illicit drugs ) OR TI ( ((drug* OR substance* OR non prescription* OR nonprescription*) N2 (misuse OR abuse OR addiction* OR dependenc* OR use*)) ) OR AB ( ((drug* OR substance* OR non prescription* OR nonprescription*) N2 (misuse OR abuse OR addiction* OR dependenc* OR use*)) )                                                                                                       |
| S35          | S5 AND S34                                                                                                                                                                                                                                                                                                                                                                                                                         |
| S36          | DE Tobacco Smoking OR MA smoking OR TI ( smoking OR smoker* ) OR AB ( smoking OR smoker* )                                                                                                                                                                                                                                                                                                                                         |
| S37          | S5 AND S36                                                                                                                                                                                                                                                                                                                                                                                                                         |
| S38          | DE Religion OR MA Religion OR TI ( religion* OR religious OR prayer* OR spirituality OR theology OR Mysticism OR buddhism OR christian* OR confucianism OR hinduism OR islam* OR judaism OR mormonism OR shamanism OR taoism ) OR AB ( religion* OR religious OR prayer* OR spirituality OR theology OR Mysticism OR buddhism OR christian* OR confucianism OR hinduism OR islam* OR judaism OR mormonism OR shamanism OR taoism ) |
| S39          | S5 AND S38                                                                                                                                                                                                                                                                                                                                                                                                                         |
| S40          | DE Academic Achievement OR MA educational status OR TI ( (educational N3 status) OR literacy OR illiteracy OR (academic N2 fail*) ) OR AB ( (educational N3 status) OR literacy OR illiteracy OR (academic N2 fail*) )                                                                                                                                                                                                             |
| S41          | S5 AND S40                                                                                                                                                                                                                                                                                                                                                                                                                         |
| S42          | DE ( Social Justice OR Social Values OR Resource Allocation ) OR MA ( Social Justice OR Social Values OR Resource Allocation OR Health Care Rationing OR Health Priorities ) OR TI equity OR AB equity                                                                                                                                                                                                                             |
| S43          | S5 AND S42                                                                                                                                                                                                                                                                                                                                                                                                                         |
| S44          | S7 OR S9 OR S11 OR S13 OR S15 OR S17 OR S19 OR S21 OR S23 OR S25 OR S27 OR S29 OR S31 OR S33 OR S35 OR S37 OR S39 OR S41 OR S43                                                                                                                                                                                                                                                                                                    |
| S45          | ( (MA Animals NOT MA Humans) ) OR MA ( "Animals, Laboratory" OR Animal Experimentation OR "Models, Animal" OR Rodentia ) OR TI ( rat or rats or mouse or mice )                                                                                                                                                                                                                                                                    |
| S46          | PZ (letter OR editorial OR comment/reply OR Column/Opinion OR dissertation) OR TI ( comment OR letter )                                                                                                                                                                                                                                                                                                                            |
| <b>Total</b> |                                                                                                                                                                                                                                                                                                                                                                                                                                    |
| S47          | S44 NOT (S45 OR S46)                                                                                                                                                                                                                                                                                                                                                                                                               |
| S48          | S44 NOT (S45 OR S46)<br>Limiters - English                                                                                                                                                                                                                                                                                                                                                                                         |

**Table S-1e. CINAHL Search Strategy (Conducted 31 May 2022)**

**Limits: Humans; English; No Comments, letters or editorials. US only**

| Search No.         | Search Terms                                                                                                                                                                                                                                                                                                                                                                                                                                                                                                                                                                                                                                                                                                                                                                                                                                                                                                                                                                                                                                                                                                                                                                                                                                                                                                                                                                                                                                                                                                                                                                                                      |
|--------------------|-------------------------------------------------------------------------------------------------------------------------------------------------------------------------------------------------------------------------------------------------------------------------------------------------------------------------------------------------------------------------------------------------------------------------------------------------------------------------------------------------------------------------------------------------------------------------------------------------------------------------------------------------------------------------------------------------------------------------------------------------------------------------------------------------------------------------------------------------------------------------------------------------------------------------------------------------------------------------------------------------------------------------------------------------------------------------------------------------------------------------------------------------------------------------------------------------------------------------------------------------------------------------------------------------------------------------------------------------------------------------------------------------------------------------------------------------------------------------------------------------------------------------------------------------------------------------------------------------------------------|
| <b>Disease</b>     |                                                                                                                                                                                                                                                                                                                                                                                                                                                                                                                                                                                                                                                                                                                                                                                                                                                                                                                                                                                                                                                                                                                                                                                                                                                                                                                                                                                                                                                                                                                                                                                                                   |
| S1                 | MH "Meningococcal Infections+" OR SU ( Meningococcal Infections OR Neisseria meningitidis ) OR ( TI ( meningiti* OR meningococc* OR Micrococcus intracellularis OR Neisseria weichselbaumi OR IMD ) OR AB ( meningiti* OR meningococc* OR Micrococcus intracellularis OR Neisseria weichselbaumi OR IMD ) )                                                                                                                                                                                                                                                                                                                                                                                                                                                                                                                                                                                                                                                                                                                                                                                                                                                                                                                                                                                                                                                                                                                                                                                                                                                                                                       |
| <b>Vaccination</b> |                                                                                                                                                                                                                                                                                                                                                                                                                                                                                                                                                                                                                                                                                                                                                                                                                                                                                                                                                                                                                                                                                                                                                                                                                                                                                                                                                                                                                                                                                                                                                                                                                   |
| S2                 | (MH "Immunization+") OR SU ( Vaccination OR Vaccines OR Immunization OR Immunization Programs ) OR ( TI ( vaccin* OR immuni* ) OR AB ( vaccin* OR immuni* ) )                                                                                                                                                                                                                                                                                                                                                                                                                                                                                                                                                                                                                                                                                                                                                                                                                                                                                                                                                                                                                                                                                                                                                                                                                                                                                                                                                                                                                                                     |
| S3                 | S1 AND S2                                                                                                                                                                                                                                                                                                                                                                                                                                                                                                                                                                                                                                                                                                                                                                                                                                                                                                                                                                                                                                                                                                                                                                                                                                                                                                                                                                                                                                                                                                                                                                                                         |
| S4                 | (MH "Meningococcal Vaccines") OR SU Meningococcal Vaccines OR ( TI ( acwy vax OR meningococcal vacci* OR antimeningococcal vacci* OR bexsero OR mc 4 vacci* OR mc4 vacci* OR MCP CRM197 conjugate vacci* OR men quad tt OR menactra OR menacwy OR menafrivac OR menbvac OR mencevax OR meningitec OR meningoccal vacci* OR meningococcal group B vacci* OR meningococcus vacci* OR meninvact OR menjugate OR menomune OR menpovax OR menquadfi OR menveo OR menzb OR neisvac c OR New Zealand candidate vacci* OR nimenrix OR nonamen OR tetramen-t OR trumenba OR va mengoc bc ) OR AB ( acwy vax OR meningococcal vacci* OR antimeningococcal vacci* OR bexsero OR mc 4 vacci* OR mc4 vacci* OR MCP CRM197 conjugate vacci* OR men quad tt OR menactra OR menacwy OR menafrivac OR menbvac OR mencevax OR meningitec OR meningoccal vacci* OR meningococcal group B vacci* OR meningococcus vacci* OR meninvact OR menjugate OR menomune OR menpovax OR menquadfi OR menveo OR menzb OR neisvac c OR New Zealand candidate vacci* OR nimenrix OR nonamen OR tetramen-t OR trumenba OR va mengoc bc ) )                                                                                                                                                                                                                                                                                                                                                                                                                                                                                                          |
| S5                 | S3 OR S4                                                                                                                                                                                                                                                                                                                                                                                                                                                                                                                                                                                                                                                                                                                                                                                                                                                                                                                                                                                                                                                                                                                                                                                                                                                                                                                                                                                                                                                                                                                                                                                                          |
| S6                 | MH ( "Healthcare Disparities" OR "Health Status Disparities" ) OR SU ( Health Equity OR Healthcare Disparities OR Health Status Disparities ) OR ( TI ( (health* N3 (disparit* or inequalit* or inequit* or equit* or equalit*)) ) OR AB ( (health* N3 (disparit* or inequalit* or inequit* or equit* or equalit*)) ) )                                                                                                                                                                                                                                                                                                                                                                                                                                                                                                                                                                                                                                                                                                                                                                                                                                                                                                                                                                                                                                                                                                                                                                                                                                                                                           |
| S7                 | S5 AND S6                                                                                                                                                                                                                                                                                                                                                                                                                                                                                                                                                                                                                                                                                                                                                                                                                                                                                                                                                                                                                                                                                                                                                                                                                                                                                                                                                                                                                                                                                                                                                                                                         |
| S8                 | ( (MH "Minority Groups") OR (MH "Ethnic Groups+") OR (MH "Social Status") OR (MH "Social Determinants of Health") OR (MH "African Americans") OR (MH "Native Americans"+) OR (MH "Asians") ) OR SU ( ( Minority Health OR "health disparity, minority and vulnerable populations" OR "ethnic and racial minorities" OR "hierarchy, social" OR social marginalization OR social vulnerability OR "Social Determinants of Health" OR African Americans OR African Continental Ancestry Group OR American Native Continental Ancestry Group OR Asian Continental Ancestry Group OR oceanic ancestry group ) ) OR ( TI ( Minority Health OR vulnerable* OR disadvantaged OR under served OR underserved OR neglect* OR marginal* OR socially excluded OR social deprivation OR social disparit* OR social determinant* OR social inequit* OR racial disparit* OR racial inequit* OR racial equalit* OR racial equity OR ethnic disparit* OR ((ethnic* OR minorit* OR race* OR racial) N3 (background OR communit* OR group* OR population*)) OR (high-risk N3 (communit* OR group* OR population* OR people OR person*)) OR african american* OR african ancestry OR aian OR asian* OR black* OR caucasian* OR ghetto* OR hispanic* OR indian* OR latino* OR latina* OR native american* OR pacific islander* OR people of color OR people of colour OR slum* OR white OR whites ) OR AB ( Minority Health OR vulnerable* OR disadvantaged OR under served OR underserved OR neglect* OR marginal* OR socially excluded OR social deprivation OR social disparit* OR social determinant* OR social inequit* OR racial |

| Search No. | Search Terms                                                                                                                                                                                                                                                                                                                                                                                                                                                                                                                                                                                                                                                                                                                                                                                                                                                                                                                                                                                                                                                                                                                                                                                                                                                                                     |
|------------|--------------------------------------------------------------------------------------------------------------------------------------------------------------------------------------------------------------------------------------------------------------------------------------------------------------------------------------------------------------------------------------------------------------------------------------------------------------------------------------------------------------------------------------------------------------------------------------------------------------------------------------------------------------------------------------------------------------------------------------------------------------------------------------------------------------------------------------------------------------------------------------------------------------------------------------------------------------------------------------------------------------------------------------------------------------------------------------------------------------------------------------------------------------------------------------------------------------------------------------------------------------------------------------------------|
|            | disparit* OR racial inequit* OR racial equalit* OR racial equity OR ethnic disparit* OR ((ethnic* OR minorit* OR race* OR racial) N3 (background OR communit* OR group* OR population*)) OR (high-risk N3 (communit* OR group* OR population* OR people OR person*)) OR african american* OR african ancestry OR aian OR asian* OR black* OR caucasian* OR ghetto* OR hispanic* OR indian* OR latino* OR latina* OR native american* OR pacific islander* OR people of color OR people of colour OR slum* OR white OR whites ) )                                                                                                                                                                                                                                                                                                                                                                                                                                                                                                                                                                                                                                                                                                                                                                 |
| S9         | S5 AND S8                                                                                                                                                                                                                                                                                                                                                                                                                                                                                                                                                                                                                                                                                                                                                                                                                                                                                                                                                                                                                                                                                                                                                                                                                                                                                        |
| S10        | ( (MH "Emigration and Immigration") OR (MH "Refugees+") ) OR SU ( "Emigrants and Immigrants" OR Refugees ) OR ( TI ( emigrant* OR Immigrant* OR migrant* OR refugee* OR Asylum Seeker* OR displaced person* ) OR AB ( emigrant* OR Immigrant* OR migrant* OR refugee* OR Asylum Seeker* OR displaced person* ) )                                                                                                                                                                                                                                                                                                                                                                                                                                                                                                                                                                                                                                                                                                                                                                                                                                                                                                                                                                                 |
| S11        | S5 AND S10                                                                                                                                                                                                                                                                                                                                                                                                                                                                                                                                                                                                                                                                                                                                                                                                                                                                                                                                                                                                                                                                                                                                                                                                                                                                                       |
| S12        | ( (MH "Poverty Areas") OR (MH "Poverty+") OR (MH "Medically Underserved Area") OR (MH "Socioeconomic Factors+") OR (MH "Homeless Persons") ) OR SU ( Poverty OR poverty area OR Medically Underserved Area OR socioeconomic factors OR Homeless Persons ) OR ( TI ( poverty OR low income* OR middle income* OR low resource* OR impoverish OR indigence OR indigency OR OR homeless OR jobless OR job seek* OR single parent* OR single mother* OR lone parent* OR health insurance status OR (socio economic* N3 (inequalit* OR unequal* OR inequit* OR disparit* OR imparit* OR discrepant* OR imbalance* OR factor*)) ) OR AB ( poverty OR low income* OR middle income* OR low resource* OR impoverish OR indigence OR indigency OR OR homeless OR jobless OR job seek* OR single parent* OR single mother* OR lone parent* OR health insurance status OR (socio economic* N3 (inequalit* OR unequal* OR inequit* OR disparit* OR imparit* OR discrepant* OR imbalance* OR factor*)) ) )                                                                                                                                                                                                                                                                                                    |
| S13        | S5 AND S12                                                                                                                                                                                                                                                                                                                                                                                                                                                                                                                                                                                                                                                                                                                                                                                                                                                                                                                                                                                                                                                                                                                                                                                                                                                                                       |
| S14        | ( (MH "Sexual and Gender Minorities+") ) OR SU ( "Sexual and Gender Minorities" ) OR ( TI ( ((Sexual OR Gender) N2 Minorit*) OR homosexual* OR homo sexual* OR bisexual* OR gay OR gays OR lesbian* OR pansexual* OR queer* OR asexual* OR transgender* OR transsexual* OR intersex* OR gender-expansive OR LGBT* OR GLBTI* OR 2 spirit* OR gender diverse OR gender fluid* OR non binary OR men who have sex with men ) OR AB ( ((Sexual OR Gender) N2 Minorit*) OR homosexual* OR homo sexual* OR bisexual* OR gay OR gays OR lesbian* OR pansexual* OR queer* OR asexual* OR transgender* OR transsexual* OR intersex* OR gender-expansive OR LGBT* OR GLBTI* OR 2 spirit* OR gender diverse OR gender fluid* OR non binary OR men who have sex with men ) )                                                                                                                                                                                                                                                                                                                                                                                                                                                                                                                                  |
| S15        | S5 AND S14                                                                                                                                                                                                                                                                                                                                                                                                                                                                                                                                                                                                                                                                                                                                                                                                                                                                                                                                                                                                                                                                                                                                                                                                                                                                                       |
| S16        | ( (MH "Sociodemographic Factors") OR (MH "Community Resources") OR (MH "Health Services Accessibility+") OR (MH "Health Services Needs and Demand+") OR (MH "Health Services, Indigenous") OR (MH "Rural Health") OR (MH "Rural Health Services") OR (MH "Urban Health") OR (MH "Urban Health Services") OR (MH "Urban Population") OR (MH "Rural Population") ) OR SU ( sociodemographic factors OR community resources OR Health Services Accessibility OR "Health Services Needs and Demand" OR health services, indigenous OR rural health OR rural health services OR urban health OR urban health services OR rural population OR urban population ) OR ( TI ( ((geographic OR regional OR urban OR rural OR demographic OR cultural) N4 (inequalit* OR unequal* OR inequit* OR disparit* OR imparit* OR discrepant* OR imbalance* OR barrier* OR facilitat* OR motivat*)) OR rural area* OR rural population* OR rural health* OR urban health* OR urban population* ) OR AB ( ((geographic OR regional OR urban OR rural OR demographic OR cultural) N4 (inequalit* OR unequal* OR inequit* OR disparit* OR imparit* OR discrepant* OR imbalance* OR barrier* OR facilitat* OR motivat*)) OR rural area* OR rural population* OR rural health* OR urban health* OR urban population* ) ) |
| S17        | S5 AND S16                                                                                                                                                                                                                                                                                                                                                                                                                                                                                                                                                                                                                                                                                                                                                                                                                                                                                                                                                                                                                                                                                                                                                                                                                                                                                       |

| Search No. | Search Terms                                                                                                                                                                                                                                                                                                                                                                                                                                                                                                                                                                                                                                                                                                                                                                                                                                                                                                                           |
|------------|----------------------------------------------------------------------------------------------------------------------------------------------------------------------------------------------------------------------------------------------------------------------------------------------------------------------------------------------------------------------------------------------------------------------------------------------------------------------------------------------------------------------------------------------------------------------------------------------------------------------------------------------------------------------------------------------------------------------------------------------------------------------------------------------------------------------------------------------------------------------------------------------------------------------------------------|
| S18        | TI ( ((improv* OR enhanc* OR encourag* OR increas* OR support* OR assist* OR maxim* OR promot* OR facilitat*) N3 (uptake OR cover* OR acceptanc* OR complianc* OR complet* OR acceptab* OR adoption OR rate* OR access OR equit* OR equalit*)) ) OR AB ( ((improv* OR enhanc* OR encourag* OR increas* OR support* OR assist* OR maxim* OR promot* OR facilitat*) N3 (uptake OR cover* OR acceptanc* OR complianc* OR complet* OR acceptab* OR adoption OR rate* OR access OR equit* OR equalit*)) )                                                                                                                                                                                                                                                                                                                                                                                                                                   |
| S19        | S5 AND S18                                                                                                                                                                                                                                                                                                                                                                                                                                                                                                                                                                                                                                                                                                                                                                                                                                                                                                                             |
| S20        | TI ( ((decreas* OR reduc* OR minimi* OR detect* OR chang*) N3 (inequalit* OR unequal* OR inequit* OR disparit* OR imparit* OR discrepant* OR imbalance*)) ) OR AB ( ((decreas* OR reduc* OR minimi* OR detect* OR chang*) N3 (inequalit* OR unequal* OR inequit* OR disparit* OR imparit* OR discrepant* OR imbalance*)) )                                                                                                                                                                                                                                                                                                                                                                                                                                                                                                                                                                                                             |
| S21        | S5 AND S20                                                                                                                                                                                                                                                                                                                                                                                                                                                                                                                                                                                                                                                                                                                                                                                                                                                                                                                             |
| S22        | (MH "Anti-Vaccination Movement") OR SU Anti-Vaccination Movement OR ( TI ( Anti-Vaccination OR anti-VAC OR anti-vaccine OR anti-vax* OR antivaccinal OR antivaccination OR antivaccine OR antivax* ) OR AB ( Anti-Vaccination OR anti-VAC OR anti-vaccine OR anti-vax* OR antivaccinal OR antivaccination OR antivaccine OR antivax* ) )                                                                                                                                                                                                                                                                                                                                                                                                                                                                                                                                                                                               |
| S23        | S5 AND S22                                                                                                                                                                                                                                                                                                                                                                                                                                                                                                                                                                                                                                                                                                                                                                                                                                                                                                                             |
| S24        | (MH "Vaccination Hesitancy") OR SU Vaccination Hesitancy OR ( TI ( ((vaccin* OR immuni*) N3 (hesitan* OR refus* OR delay* OR barrier* OR obstacle* OR restrict* OR obstruct* OR impede* OR restrain* OR constrain* OR inhibit*)) ) OR AB ( ((vaccin* OR immuni*) N3 (hesitan* OR refus* OR delay* OR barrier* OR obstacle* OR restrict* OR obstruct* OR impede* OR restrain* OR constrain* OR inhibit*)) ) )                                                                                                                                                                                                                                                                                                                                                                                                                                                                                                                           |
| S25        | S5 AND S24                                                                                                                                                                                                                                                                                                                                                                                                                                                                                                                                                                                                                                                                                                                                                                                                                                                                                                                             |
| S26        | (MH "Health Promotion+") OR SU Health Promotion OR ( TI ( ((vaccin* OR immuni*) N3 (equit* OR confidence OR complet* OR compliance OR comply OR complie* OR adher* OR access* OR facilitat* OR uptake OR up take OR take up OR improve* OR enhance* OR encourag* OR support* OR promot* OR optimiz* OR optimis* OR motivat* OR accept* OR incentive* OR attend* OR adopt* OR persuad* OR persuasion OR attitud* OR know* OR awareness* OR affordab*)) ) OR AB ( ((vaccin* OR immuni*) N3 (equit* OR confidence OR complet* OR compliance OR comply OR complie* OR adher* OR access* OR facilitat* OR uptake OR up take OR take up OR improve* OR enhance* OR encourag* OR support* OR promot* OR optimiz* OR optimis* OR motivat* OR accept* OR incentive* OR attend* OR adopt* OR persuad* OR persuasion OR attitud* OR know* OR awareness* OR affordab*)) ) )                                                                        |
| S27        | S5 AND S26                                                                                                                                                                                                                                                                                                                                                                                                                                                                                                                                                                                                                                                                                                                                                                                                                                                                                                                             |
| S28        | ( (MH "Physician Incentive Plans") OR (MH "Reimbursement, Incentive") OR (MH "Audit") ) OR SU ( Physician Incentive Plans OR "Reimbursement, Incentive" OR Medical Audit OR Clinical Audit ) OR ( TI ( incentive plan* OR reimbursement* OR medical audit* OR clinical audit* OR ((pediatric* OR parent* OR gp OR general practic* OR physician* OR doctor* OR clinician* OR nurse practitioner* OR midwife OR midwives) N3 (attitud* OR know* OR awareness*)) OR ((vaccin* OR immuni* OR parent* OR household* OR house-hold* OR clinical) N3 decision-making) ) OR AB ( incentive plan* OR reimbursement* OR medical audit* OR clinical audit* OR ((pediatric* OR parent* OR gp OR general practic* OR physician* OR doctor* OR clinician* OR nurse practitioner* OR midwife OR midwives) N3 (attitud* OR know* OR awareness*)) OR ((vaccin* OR immuni* OR parent* OR household* OR house-hold* OR clinical) N3 decision-making) ) ) |
| S29        | S5 AND S28                                                                                                                                                                                                                                                                                                                                                                                                                                                                                                                                                                                                                                                                                                                                                                                                                                                                                                                             |
| S30        | ( (MH "Health Behavior+") OR (MH "Unsafe Sex") ) OR SU ( Health Behavior OR Unsafe Sex ) OR ( TI ( ((unprotect* OR condomless OR risk OR high-risk OR unsafe) N3 (sex* OR intercourse*)) OR (sex* N2 (behavior* OR behaviour*)) ) OR AB (                                                                                                                                                                                                                                                                                                                                                                                                                                                                                                                                                                                                                                                                                              |

| Search No.   | Search Terms                                                                                                                                                                                                                                                                                                                                                                                                                                                                                                                                                                                                                                                                                                                                                                                                                                                                                                                                                                                                                                                                                                                                                                                                                                          |
|--------------|-------------------------------------------------------------------------------------------------------------------------------------------------------------------------------------------------------------------------------------------------------------------------------------------------------------------------------------------------------------------------------------------------------------------------------------------------------------------------------------------------------------------------------------------------------------------------------------------------------------------------------------------------------------------------------------------------------------------------------------------------------------------------------------------------------------------------------------------------------------------------------------------------------------------------------------------------------------------------------------------------------------------------------------------------------------------------------------------------------------------------------------------------------------------------------------------------------------------------------------------------------|
|              | ((unprotect* OR condomless OR risk OR high-risk OR unsafe) N3 (sex* OR intercourse*)) OR (sex* N2 (behavior* OR behaviour*)) ) )                                                                                                                                                                                                                                                                                                                                                                                                                                                                                                                                                                                                                                                                                                                                                                                                                                                                                                                                                                                                                                                                                                                      |
| S31          | S5 AND S30                                                                                                                                                                                                                                                                                                                                                                                                                                                                                                                                                                                                                                                                                                                                                                                                                                                                                                                                                                                                                                                                                                                                                                                                                                            |
| S32          | (MH "Alcoholism") OR SU Alcoholism OR ( TI ( alcoholism OR (alcohol* N2 (dependenc* or addiction* or abuse or intoxication* or use*)) ) OR AB ( alcoholism OR (alcohol* N2 (dependenc* or addiction* or abuse or intoxication* or use*)) ) ) )                                                                                                                                                                                                                                                                                                                                                                                                                                                                                                                                                                                                                                                                                                                                                                                                                                                                                                                                                                                                        |
| S33          | S5 AND S32                                                                                                                                                                                                                                                                                                                                                                                                                                                                                                                                                                                                                                                                                                                                                                                                                                                                                                                                                                                                                                                                                                                                                                                                                                            |
| S34          | SU ( Drug Misuse OR illicit drugs ) OR ( TI ( ((drug* OR substance* OR non prescription* OR nonprescription*) N2 (misuse OR abuse OR addiction* OR dependenc* OR use*)) ) OR AB ( ((drug* OR substance* OR non prescription* OR nonprescription*) N2 (misuse OR abuse OR addiction* OR dependenc* OR use*)) ) )                                                                                                                                                                                                                                                                                                                                                                                                                                                                                                                                                                                                                                                                                                                                                                                                                                                                                                                                       |
| S35          | S5 AND S34                                                                                                                                                                                                                                                                                                                                                                                                                                                                                                                                                                                                                                                                                                                                                                                                                                                                                                                                                                                                                                                                                                                                                                                                                                            |
| S36          | (MH "Smoking+") OR SU smoking OR ( TI ( smoking OR smoker* ) OR AB ( smoking OR smoker* ) )                                                                                                                                                                                                                                                                                                                                                                                                                                                                                                                                                                                                                                                                                                                                                                                                                                                                                                                                                                                                                                                                                                                                                           |
| S37          | S5 AND S36                                                                                                                                                                                                                                                                                                                                                                                                                                                                                                                                                                                                                                                                                                                                                                                                                                                                                                                                                                                                                                                                                                                                                                                                                                            |
| S38          | ( (MH "Religion and Religions"+) ) OR SU Religion OR ( TI ( religion* OR religious OR prayer* OR spirituality OR theology OR Mysticism OR buddhism OR christian* OR confucianism OR hinduism OR islam* OR judaism OR mormonism OR shamanism OR taoism ) OR AB ( religion* OR religious OR prayer* OR spirituality OR theology OR Mysticism OR buddhism OR christian* OR confucianism OR hinduism OR islam* OR judaism OR mormonism OR shamanism OR taoism ) )                                                                                                                                                                                                                                                                                                                                                                                                                                                                                                                                                                                                                                                                                                                                                                                         |
| S39          | S5 AND S38                                                                                                                                                                                                                                                                                                                                                                                                                                                                                                                                                                                                                                                                                                                                                                                                                                                                                                                                                                                                                                                                                                                                                                                                                                            |
| S40          | (MH "Educational Status") OR SU educational status OR ( TI ( (educational N3 status) OR literacy OR illiteracy OR (academic N2 fail*) ) OR AB ( (educational N3 status) OR literacy OR illiteracy OR (academic N2 fail*) ) )                                                                                                                                                                                                                                                                                                                                                                                                                                                                                                                                                                                                                                                                                                                                                                                                                                                                                                                                                                                                                          |
| S41          | S5 AND S40                                                                                                                                                                                                                                                                                                                                                                                                                                                                                                                                                                                                                                                                                                                                                                                                                                                                                                                                                                                                                                                                                                                                                                                                                                            |
| S42          | ( (MH "Social Justice+") OR (MH "Social Values+") OR (MH "Resource Allocation+") OR (MH "Health Priorities") ) OR SU ( Social Justice OR Social Values OR Resource Allocation OR Health Care Rationing OR Health Priorities ) OR ( TI equity OR AB equity )                                                                                                                                                                                                                                                                                                                                                                                                                                                                                                                                                                                                                                                                                                                                                                                                                                                                                                                                                                                           |
| S43          | S5 AND S42                                                                                                                                                                                                                                                                                                                                                                                                                                                                                                                                                                                                                                                                                                                                                                                                                                                                                                                                                                                                                                                                                                                                                                                                                                            |
| S44          | S7 OR S9 OR S11 OR S13 OR S15 OR S17 OR S19 OR S21 OR S23 OR S25 OR S27 OR S29 OR S31 OR S33 OR S35 OR S37 OR S39 OR S41 OR S43                                                                                                                                                                                                                                                                                                                                                                                                                                                                                                                                                                                                                                                                                                                                                                                                                                                                                                                                                                                                                                                                                                                       |
| S45          | ( (MH "Animals") NOT (MH "Human") ) OR (MH "Animals, Laboratory") OR TI ( rat or rats or mouse or mice )                                                                                                                                                                                                                                                                                                                                                                                                                                                                                                                                                                                                                                                                                                                                                                                                                                                                                                                                                                                                                                                                                                                                              |
| S46          | PT ( letter OR editorial OR commentary ) OR TI ( comment OR letter )                                                                                                                                                                                                                                                                                                                                                                                                                                                                                                                                                                                                                                                                                                                                                                                                                                                                                                                                                                                                                                                                                                                                                                                  |
| <b>Total</b> |                                                                                                                                                                                                                                                                                                                                                                                                                                                                                                                                                                                                                                                                                                                                                                                                                                                                                                                                                                                                                                                                                                                                                                                                                                                       |
| S47          | S44 NOT (S45 OR S46)                                                                                                                                                                                                                                                                                                                                                                                                                                                                                                                                                                                                                                                                                                                                                                                                                                                                                                                                                                                                                                                                                                                                                                                                                                  |
| S48          | ( S44 NOT (S45 OR S46) ) AND LA English                                                                                                                                                                                                                                                                                                                                                                                                                                                                                                                                                                                                                                                                                                                                                                                                                                                                                                                                                                                                                                                                                                                                                                                                               |
| S49          | TI ( "united states" OR "usa" OR "u.s.a." OR "u.s." OR alabama OR alaska OR arizona OR arkansas OR california OR colorado OR connecticut OR delaware OR florida OR georgia OR hawaii OR idaho OR illinois OR iowa OR kansas OR kentucky OR louisiana OR maine OR maryland OR massachusetts OR michigan OR minnesota OR mississippi OR missouri OR montana OR nebraska OR nevada OR "new hampshire" OR "new jersey" OR "new mexico" OR "new york" OR "north carolina" OR "north dakota" OR ohio OR oklahoma OR oregon OR pennsylvania OR "rhode island" OR "south carolina" OR "south dakota" OR tennessee OR texas OR utah OR vermont OR virginia OR washington OR "west virginia" OR wisconsin OR wyoming OR "puerto rico" ) OR AB ( "united states" OR "usa" OR "u.s.a." OR "u.s." OR alabama OR alaska OR arizona OR arkansas OR california OR colorado OR connecticut OR delaware OR florida OR georgia OR hawaii OR idaho OR illinois OR iowa OR kansas OR kentucky OR louisiana OR maine OR maryland OR massachusetts OR michigan OR minnesota OR mississippi OR missouri OR montana OR nebraska OR nevada OR "new hampshire" OR "new jersey" OR "new mexico" OR "new york" OR "north carolina" OR "north dakota" OR ohio OR oklahoma OR oregon |

| Search No. | Search Terms                                                                                                                                                                                                                                                                                                                                                                                                                                                                                                                                                                                                                                                                                                                                                                                                                                                                                                                                                                                                                                                                                                                                                                                                                                                                                                                                                                                                                                                                                                                                                                                                                                                                                                              |
|------------|---------------------------------------------------------------------------------------------------------------------------------------------------------------------------------------------------------------------------------------------------------------------------------------------------------------------------------------------------------------------------------------------------------------------------------------------------------------------------------------------------------------------------------------------------------------------------------------------------------------------------------------------------------------------------------------------------------------------------------------------------------------------------------------------------------------------------------------------------------------------------------------------------------------------------------------------------------------------------------------------------------------------------------------------------------------------------------------------------------------------------------------------------------------------------------------------------------------------------------------------------------------------------------------------------------------------------------------------------------------------------------------------------------------------------------------------------------------------------------------------------------------------------------------------------------------------------------------------------------------------------------------------------------------------------------------------------------------------------|
| S50        | OR pennsylvania OR "rhode island" OR "south carolina" OR "south dakota" OR tennessee OR texas OR utah OR vermont OR virginia OR washington OR "west virginia" OR wisconsin OR wyoming OR "puerto rico" ) OR MW ( "united states" OR "usa" OR "u.s.a." OR "u.s." OR alabama OR alaska OR arizona OR arkansas OR california OR colorado OR connecticut OR delaware OR florida OR georgia OR hawaii OR idaho OR illinois OR indiana OR iowa OR kansas OR kentucky OR louisiana OR maine OR maryland OR massachusetts OR michigan OR minnesota OR mississippi OR missouri OR montana OR nebraska OR nevada OR "new hampshire" OR "new jersey" OR "new mexico" OR "new york" OR "north carolina" OR "north dakota" OR ohio OR oklahoma OR oregon OR pennsylvania OR "rhode island" OR "south carolina" OR "south dakota" OR tennessee OR texas OR utah OR vermont OR virginia OR washington OR "west virginia" OR wisconsin OR wyoming OR "puerto rico" ) OR AF ( "united states" OR "usa" OR "u.s.a." OR "u.s." OR alabama OR alaska OR arizona OR arkansas OR california OR colorado OR connecticut OR delaware OR florida OR georgia OR hawaii OR idaho OR illinois OR indiana OR iowa OR kansas OR kentucky OR louisiana OR maine OR maryland OR massachusetts OR michigan OR minnesota OR mississippi OR missouri OR montana OR nebraska OR nevada OR "new hampshire" OR "new jersey" OR "new mexico" OR "new york" OR "north carolina" OR "north dakota" OR ohio OR oklahoma OR oregon OR pennsylvania OR "rhode island" OR "south carolina" OR "south dakota" OR tennessee OR texas OR utah OR vermont OR virginia OR washington OR "west virginia" OR wisconsin OR wyoming OR "puerto rico" ) Show Less<br>S48 AND S49 |

**Table S-2. PICOS Criteria**

**List of Criteria for the Inclusion and Exclusion of Studies During the Screening Process**

| <b>Criteria</b>               | <b>Included</b>                                                                                                                                                                                                                                                                                                                                                                                                                                                                                                                                                                                                                                                                             | <b>Excluded</b>                                                                                                                                                                                                                                                                                                                                         |
|-------------------------------|---------------------------------------------------------------------------------------------------------------------------------------------------------------------------------------------------------------------------------------------------------------------------------------------------------------------------------------------------------------------------------------------------------------------------------------------------------------------------------------------------------------------------------------------------------------------------------------------------------------------------------------------------------------------------------------------|---------------------------------------------------------------------------------------------------------------------------------------------------------------------------------------------------------------------------------------------------------------------------------------------------------------------------------------------------------|
| Population                    | <ul style="list-style-type: none"> <li>Studies that include individuals aged 10-25 years; individuals at increased risk of meningococcal infection</li> </ul>                                                                                                                                                                                                                                                                                                                                                                                                                                                                                                                               | <ul style="list-style-type: none"> <li>Children aged &lt; 10 years not at increased risk of meningococcal infection</li> </ul>                                                                                                                                                                                                                          |
| Interventions and comparators | <ul style="list-style-type: none"> <li>MenACWY vaccines               <ul style="list-style-type: none"> <li>MenACWY-DT (Menactra)</li> <li>MenACWY-CRM (Menveo)</li> <li>MenACWY-TT (MenQuadfi)</li> </ul> </li> <li>MenB vaccines               <ul style="list-style-type: none"> <li>MenB-FHbp (Trumenba)</li> <li>MenB-4C (Bexsero)</li> </ul> </li> </ul>                                                                                                                                                                                                                                                                                                                             | <ul style="list-style-type: none"> <li>Other meningococcal vaccines (e.g., Monovalent vaccines other than MenB: MenA, MenC, etc.)</li> </ul>                                                                                                                                                                                                            |
| Outcomes                      | <ul style="list-style-type: none"> <li>Health equity (e.g., access, receipt, and coverage of MenACWY or MenB vaccination)</li> <li>Vaccine awareness (ACWY or B)</li> <li>Vaccine knowledge (ACWY or B)</li> <li>Vaccine hesitancy (ACWY or B)</li> <li>Vaccine insurance coverage (ACWY or B)</li> <li>Physicians' awareness, knowledge, and attitude regarding meningococcal infection, availability of vaccines for serogroups ACWY and B, and category A or B recommendations for vaccines</li> <li>Patients' awareness of meningococcal disease and vaccines available for serogroups ACWY and B and their willingness to vaccinate their children against these infections</li> </ul> | <ul style="list-style-type: none"> <li>Studies that do not report outcomes of interest in specified patient populations (i.e., individuals aged 10-25 years or individuals at increased risk of meningococcal infection)</li> <li>Outcomes for meningococcal vaccines other than MenACWY and MenB</li> <li>Outcomes not on the included list</li> </ul> |

| Criteria                           | Included                                                                                                                                                                                                                                                                                                                                                                                                                                                                                                                                                                                                                                                                                                                                                                                                                      | Excluded                                                                                                                                             |
|------------------------------------|-------------------------------------------------------------------------------------------------------------------------------------------------------------------------------------------------------------------------------------------------------------------------------------------------------------------------------------------------------------------------------------------------------------------------------------------------------------------------------------------------------------------------------------------------------------------------------------------------------------------------------------------------------------------------------------------------------------------------------------------------------------------------------------------------------------------------------|------------------------------------------------------------------------------------------------------------------------------------------------------|
| PROGRESS-Plus Factors <sup>a</sup> | <ul style="list-style-type: none"> <li>Place or state of residence (e.g., remote, overcrowding, homeless)</li> <li>Race (inclusive of all categories below) <ul style="list-style-type: none"> <li>Ethnicity</li> <li>Culture</li> <li>Language</li> <li>Immigration</li> <li>Refugee status</li> </ul> </li> <li>Occupation</li> <li>Gender identity or sex</li> <li>Religion or belief system</li> <li>Education or literacy</li> <li>Socioeconomic status</li> <li>Social capital (e.g., social support, networks, trust)</li> <li>Other <ul style="list-style-type: none"> <li>Age</li> <li>Alcohol use or abuse</li> <li>Intravenous or illicit drug use</li> <li>Risk group (general)</li> <li>Sexual risk behaviors</li> <li>Smoking</li> <li>Preexisting conditions (e.g., disease, pregnancy)</li> </ul> </li> </ul> | <ul style="list-style-type: none"> <li>PROGRESS-Plus factors not on the included list</li> </ul>                                                     |
| Study design                       | <ul style="list-style-type: none"> <li>Systematic reviews (including meta-analyses)</li> <li>Randomized controlled trials</li> <li>Observational studies, including phase 4 trials</li> <li>Cohort studies</li> <li>Cross-sectional studies</li> <li>Case-control studies</li> <li>Observational phase (e.g., long-term follow-up)</li> </ul>                                                                                                                                                                                                                                                                                                                                                                                                                                                                                 | <ul style="list-style-type: none"> <li>Case reports</li> <li>Commentaries, letters, preprints, or editorials</li> <li>Preclinical studies</li> </ul> |
| Limits                             | <ul style="list-style-type: none"> <li>English language</li> <li>No date limit</li> </ul>                                                                                                                                                                                                                                                                                                                                                                                                                                                                                                                                                                                                                                                                                                                                     | <ul style="list-style-type: none"> <li>Animal studies</li> <li>Non-US studies</li> </ul>                                                             |

MenA = serogroup A meningococcal; MenACWY = meningococcal conjugate; MenB = serogroup B meningococcal; MenC = serogroup C meningococcal; PICOS = Population and disease condition, interventions, comparators, outcomes, and study criteria; US = United States.

Note: If it is unclear whether a study meets any criterion during the level 1 screening process, the study will be progressed to full-text screening to confirm its inclusion in the review.

<sup>a</sup> PROGRESS is an acronym used by the Cochrane [Equity Methods Group](#) ~~Network~~ to identify characteristics that stratify health opportunities and outcomes.

**Table S-3. Summary of Study Design and Findings of Included Studies (n = 34)**

| No. | Reference/US geography (state)       | Study design                                                                                                                                                                                                                            | Population/N                                                                                                                           | Objective                                                                                                                                                                                                  | Quantitative measures reported (e.g., OR, RR) |
|-----|--------------------------------------|-----------------------------------------------------------------------------------------------------------------------------------------------------------------------------------------------------------------------------------------|----------------------------------------------------------------------------------------------------------------------------------------|------------------------------------------------------------------------------------------------------------------------------------------------------------------------------------------------------------|-----------------------------------------------|
| 1   | Bart et al. [1]<br>Pennsylvania      | A cross-sectional analysis of all 16- to 18-year-olds with a record in the Philadelphia immunization registry (KIDS Plus II) from 23 October 2015 through 31 July 2017, and the US Census American Community Survey (2016)              | Parents of 16- to 18-year-olds<br>N = 85,489                                                                                           | To identify sociodemographic and provider factors associated with MenB vaccine receipt among 16- to 18-year-olds in Philadelphia county                                                                    | Adjusted odds ratio                           |
| 2   | Basta et al. [2]<br>Minnesota        | An in-person, cross-sectional survey at the University of Minnesota's Driven to Discover research facility during the 2017 Minnesota State Fair. Potential participants who approached the study booth were invited to take the survey. | Parents of children attending high school during the 2017-2018 academic year<br>N = 445                                                | To determine how knowledgeable parents are about meningococcal vaccines and meningococcal disease and how willing they are to have their child vaccinated with MenB vaccines compared with MenACWY vaccine | Adjusted odds ratio                           |
| 3   | Bernstein et al. [3]<br>US, national | Retrospective analysis of state-level associations between voting patterns and adolescent coverage for at least 1 dose of HPV, Tdap, and MenACWY                                                                                        | Adolescents in the US who received HPV, MCV4, and/or tetanus-containing vaccination according to the 2012 NIS-Teen<br>N = Not provided | To examine state-level associations between voting patterns and adolescent coverage for at least 1 dose of HPV, tetanus-containing (Tdap), and MCV4                                                        | Kruskal-Wallis test                           |
| 4   | Cataldi et al. [4]<br>Colorado       | Internet and mail survey of Colorado public health nurses, pediatric, and family medicine clinicians                                                                                                                                    | Public health nurses, pediatric, and family medicine clinicians in Colorado<br>N = 163                                                 | To assess whether there were rural-urban differences in perceived logistic barriers to adolescent vaccination (Tdap, MenACWY, HPV, influenza),                                                             | Response rates                                |

| No. | Reference/US geography                     |                                                                                                                                                                                                                    | Population/N                                                                                                               | Objective                                                                                                                                                                                                                                                                                                                       | Quantitative measures reported (e.g., OR, RR) |
|-----|--------------------------------------------|--------------------------------------------------------------------------------------------------------------------------------------------------------------------------------------------------------------------|----------------------------------------------------------------------------------------------------------------------------|---------------------------------------------------------------------------------------------------------------------------------------------------------------------------------------------------------------------------------------------------------------------------------------------------------------------------------|-----------------------------------------------|
|     | (state)                                    | Study design                                                                                                                                                                                                       |                                                                                                                            |                                                                                                                                                                                                                                                                                                                                 |                                               |
|     |                                            | from June to August 2019                                                                                                                                                                                           |                                                                                                                            | perceived parental vaccine confidence and beliefs, and adolescent immunization delivery practices among Colorado HCPs                                                                                                                                                                                                           |                                               |
| 5   | Coyne-Beasley et al. [5]<br>North Carolina | A retrospective analysis of Carolina Behavioral Risk Factor Surveillance System (BRFSS) and Child Health Assessment and Monitoring Program (CHAMP) data to determine correlates of uptake of meningococcal Vaccine | 2008 BRFSS caregivers (92% parents) of children aged 11-17 years in North Carolina who completed CHAMP survey<br>N = 1,281 | To identify correlates of uptake of meningococcal vaccine as well as vaccine awareness among parents of adolescents in North Carolina. To describe reasons for nonvaccination among the parents who are aware of the vaccine.                                                                                                   | Odds ratio                                    |
| 6   | Darden et al. [6]<br>US, national          | Computer-assisted telephone interview, survey analysis of teens examining reasons parents do not have their teens immunized                                                                                        | Adolescents 13-17 years old<br>Number of observations = 98,086                                                             | To examine reasons parents do not have their teens immunized and how these reasons have changed over time                                                                                                                                                                                                                       | Response rates                                |
| 7   | Dorell et al. [7]<br>US, national          | Telephone survey of parents/guardians of adolescents 13-17 years of age                                                                                                                                            | Parents/guardians of adolescents aged 13-17 years<br>N = 8,652                                                             | To describe factors that influence parental decisions to vaccinate their adolescent                                                                                                                                                                                                                                             | Response rates                                |
| 8   | Gargano et al. [8]<br>Georgia              | A telephone survey analysis designed to investigate demographic, behavioral, and psychosocial factors associated with parents' acceptance of vaccination for their adolescent children                             | Parents of middle and high school students<br>N = 114                                                                      | To examine: <ul style="list-style-type: none"> <li>• Parent immunization attitudes</li> <li>• Reasons for receipt or intention to have their adolescent receive recommended vaccines</li> <li>• Importance of physician recommendations</li> <li>• Psychosocial factors associated with receipt or intention to have</li> </ul> | Response rates                                |

| No. | Reference/US geography (state)        | Study design                                                                                                                                                                                                                                                                      | Population/N                                                                                                                                                                                                                   | Objective                                                                                                                                                                                            | Quantitative measures reported (e.g., OR, RR) |
|-----|---------------------------------------|-----------------------------------------------------------------------------------------------------------------------------------------------------------------------------------------------------------------------------------------------------------------------------------|--------------------------------------------------------------------------------------------------------------------------------------------------------------------------------------------------------------------------------|------------------------------------------------------------------------------------------------------------------------------------------------------------------------------------------------------|-----------------------------------------------|
|     |                                       |                                                                                                                                                                                                                                                                                   |                                                                                                                                                                                                                                | their adolescent receive a recommended vaccine                                                                                                                                                       |                                               |
| 9   | Gowda and Dempsey [9]<br>US, national | A cross-sectional study that used predictor variables including mandates, universal coverage policy, reimbursement levels, and other variables that were hypothesized to possibly confound the relationships between vaccine coverage levels and the state policies being studied | Adolescents aged 13-17 years enrolled in the 2009 NIS-Teen study<br>N = Not applicable                                                                                                                                         | To examine associations between various state policies and coverage rates for 3 vaccines (Tdap, HPV, and MenACWY) recommended specifically for adolescents                                           | Change in coverage rate                       |
| 10  | Gowda et al. [10]<br>Michigan         | A retrospective analysis of data from the Michigan Care Improvement Registry (MCIR; 2006-2010), a statewide immunization registry                                                                                                                                                 | Adolescents aged 11-18 years in Michigan<br>N = 1,252,655                                                                                                                                                                      | To identify population-level clinical and demographic factors associated with adolescent vaccination                                                                                                 | Adjusted odds ratio                           |
| 11  | Greenfield et al. [11]<br>Washington  | In-person surveys of Hispanic, Somali, and Ethiopian/Eritrean adolescents and parents of adolescents, and 3 focus groups with mothers of 11- to 18-year-olds were conducted to assess knowledge, attitudes, and barriers related to recommended adolescent vaccine                | Hispanic (primarily Mexican), Somali, and Ethiopian/Eritrean parents and adolescents living in South King County (cities of Burien, SeaTac, and Tukwila), Washington<br>Adolescents: n = 45<br>Parents of adolescents: n = 157 | To identify attitudes and knowledge of adolescent vaccination recommendations for Tdap, MCV4, and HPV vaccines among Hispanic, Somali, and Ethiopian/Eritrean communities in King County, Washington | Qualitative study; not applicable             |

| No. | Reference/US geography (state)           | Study design                                                                                                                                                                                                                                                                                                                       | Population/N                                                                                                                     | Objective                                                                                                                                                                                                                                                                                                            | Quantitative measures reported (e.g., OR, RR) |
|-----|------------------------------------------|------------------------------------------------------------------------------------------------------------------------------------------------------------------------------------------------------------------------------------------------------------------------------------------------------------------------------------|----------------------------------------------------------------------------------------------------------------------------------|----------------------------------------------------------------------------------------------------------------------------------------------------------------------------------------------------------------------------------------------------------------------------------------------------------------------|-----------------------------------------------|
| 12  | Hansen and Niccolai [12]<br>US, national | Combined analysis of NIS-Teen data from 2017-2018 surveys (first 2 years for which NIS-Teen data on MenB were available)                                                                                                                                                                                                           | Adolescents 17 years of age<br>N = 7,288                                                                                         | To determine patterns of MenB vaccine uptake following implementation of the 2015 ACIP recommendation for MenB vaccine receipt                                                                                                                                                                                       | Response rates                                |
| 13  | Healy et al. [13]<br>US, national        | Analysis of NIS-Teen survey data (2012-2014) examining adolescent vaccination rates ( $\geq 1$ dose Tdap vaccine, $\geq 1$ dose MenACWY vaccine, $\geq 3$ doses HPV vaccine) and for routine childhood vaccination catch-up doses ( $\geq 2$ doses MMR vaccine, $\geq 2$ doses varicella vaccine, and $\geq 3$ doses HepB vaccine) | Adolescents aged 13-17 years<br>N = 58,090                                                                                       | To determine if disparities exist between foreign-born and US-born adolescents in vaccination coverage for Tdap, MenACWY, HPV, MMR, HepB, and varicella vaccines                                                                                                                                                     | Response rates                                |
| 14  | Huang et al. [14]<br>US, national        | A web-based survey of US HCPs that explored characteristics associated with prescribing or receiving MenB and MenACWY vaccines, HCP knowledge of vaccine recommendations, and real-world practice pattern, in 2017                                                                                                                 | HCPs and patients aged 16-23 years of those providers who had received at least 1 childhood vaccination in the previous 6 months | (1) Examine HCP characteristics in relation to their prescribing patterns with meningococcal vaccines (MenACWY and MenB), (2) Understand real-world decision processes of HCPs and their interpretation of ACIP recommendations, and (3) assess patient characteristics associated with the receipt of MenB vaccines | Qualitative study; not applicable             |

| No. | Reference/US geography (state)      | Study design                                                                                                                                                                                                                                   | Population/N                                                                 | Objective                                                                                                                                                                                                                                                                                                          | Quantitative measures reported (e.g., OR, RR) |
|-----|-------------------------------------|------------------------------------------------------------------------------------------------------------------------------------------------------------------------------------------------------------------------------------------------|------------------------------------------------------------------------------|--------------------------------------------------------------------------------------------------------------------------------------------------------------------------------------------------------------------------------------------------------------------------------------------------------------------|-----------------------------------------------|
| 15  | Kempe et al. [15]<br>US, national   | A multivariable analysis was conducted with the dependent variable of “always/almost always or often” initiating a discussion about MenB vaccine during routine well visits for adolescents aged 16-18 years                                   | US pediatricians and family physicians                                       | To assess among US pediatricians and family physicians: <ul style="list-style-type: none"> <li>Practices regarding MenB vaccine delivery</li> <li>Factors influencing a decision to recommend vaccine</li> <li>Factors associated with discussing MenB vaccine at routine visits of 16- to 18-year-olds</li> </ul> | Adjusted odds ratio                           |
| 16  | Kempe et al. [16]<br>US, national   | A survey conducted via mail/e-mail between October and December 2016 among pediatricians and family physicians who were part of sentinel networks within each specialty                                                                        | US Pediatricians and family practice doctors<br>N = 916                      | To assess among pediatricians and family physicians nationally (1) knowledge of the meaning of category A versus B recommendations and insurance coverage implications and (2) attitudes about category A and B recommendations                                                                                    | Adjusted odds ratio                           |
| 17  | Kurosky et al. [17]<br>US, national | Retrospective analysis of Commercial Claims and Encounters (CCAE) and Medicaid MarketScan Databases from 2011-2016 to determine receipt of 1 dose of MenACWY during early (10.5 through 13 years) and late (15.5 through 18 years) adolescence | Adolescents aged 10.5-18 years<br>CCAE: N = 796,639<br>Medicaid: N = 516,684 | To identify factors associated with MenACWY uptake among adolescents. This study is complementary to the published NIS-Teen data.                                                                                                                                                                                  | Adjusted odds ratio                           |

| No. | Reference/US geography (state)       | Study design                                                                                                                                    | Population/N                                                                        | Objective                                                                                                                                                                                                       | Quantitative measures reported (e.g., OR, RR) |
|-----|--------------------------------------|-------------------------------------------------------------------------------------------------------------------------------------------------|-------------------------------------------------------------------------------------|-----------------------------------------------------------------------------------------------------------------------------------------------------------------------------------------------------------------|-----------------------------------------------|
| 18  | La et al. [18]<br>US, national       | A cross-sectional, retrospective, exploratory analysis of preexisting anonymized 2017-2018 NIS-Teen data                                        | Adolescents aged 17 years during 2017-2018<br>N = 7,288                             | To evaluate national- and regional-level $\geq 1$ dose and $\geq 2$ dose MenB vaccination coverage among US adolescents aged 17 years and to identify individual-level factors associated with MenB vaccination | Weighted odds ratio                           |
| 19  | Lu et al. [19]<br>US, national       | Database analysis of 2015 NIS-Teen data                                                                                                         | US NIS-Teen database, 2015<br>N = 21,875                                            | To assess selected vaccination coverage among adolescents by health insurance status and other access-to-care characteristics                                                                                   | Adjusted prevalence ratios                    |
| 20  | Moss et al. [20]<br>US, national     | Analysis of HCP-verified data from the 2010 NIS-Teen Survey for Tdap booster, meningococcal vaccine, and HPV vaccine (initiation among females) | Adolescents aged 13-17 years<br>N = 9,021                                           | To examine the relationship of patient-driven versus provider-driven communication styles with vaccination                                                                                                      | Response rates                                |
| 21  | Niccolai et al. [21]<br>US, national | Two-phase randomized phone survey followed by a medical record review in which HCPs complete an immunization grid                               | Adolescents 17 years of age<br>N = 3,807                                            | To describe correlates of up-to-date MenACWY vaccination among adolescents aged 17 years in the US using data from NIS-Teen                                                                                     | Adjusted odds ratio                           |
| 22  | Packnett et al. [22]<br>US, national | Retrospective health insurance claims data analysis of individuals aged 16-23 years with a MenB vaccination during January 2017                 | Individuals aged 16-23 years<br>N = 213,162                                         | To estimate and compare series completion rates for MenB-4C and MenB-FHbp during 2017-2020 among US individuals 16-23 years of age using the current dosing recommendations for MenB-FHbp.                      | Adjusted relative risk                        |
| 23  | Painter et al. [23]<br>Virginia      | Semistructured interviews; purposive sample of 30 low-income, predominantly Latin-American                                                      | Low-income, uninsured, predominantly Latin-American immigrant mothers of adolescent | To assess the vaccine-related knowledge, attitudes, and decision-making for Tdap, MenACWY, and HPV among uninsured, low-                                                                                        | Qualitative study; not applicable             |

| No. | Reference/US geography (state)   | Study design                                                                                                                                                                       | Population/N                                                                                                                                                                 | Objective                                                                                                                                                                                                                                                                                                                                                                                                                           | Quantitative measures reported (e.g., OR, RR)         |
|-----|----------------------------------|------------------------------------------------------------------------------------------------------------------------------------------------------------------------------------|------------------------------------------------------------------------------------------------------------------------------------------------------------------------------|-------------------------------------------------------------------------------------------------------------------------------------------------------------------------------------------------------------------------------------------------------------------------------------------------------------------------------------------------------------------------------------------------------------------------------------|-------------------------------------------------------|
|     |                                  | immigrant mothers of adolescent daughters aged 13-17 years. Study participants were recruited from 2 academic-community managed health clinics in Virginia (March-September 2016). | daughters aged 13-17 years<br>N = 30                                                                                                                                         | income, predominantly Latin-American immigrant mothers of adolescent daughters aged 13-17 years                                                                                                                                                                                                                                                                                                                                     |                                                       |
| 24  | Phillips et al. [24]<br>Illinois | Longitudinal cohort study of young men who have sex with men using data collected from study U01DA036939 (RADAR)                                                                   | Persons aged 16-29 years, assigned male at birth, English-speaking, and reported a sexual encounter with a male in the past year or identified as gay or bisexual<br>N = 486 | To describe the knowledge and awareness of, and vaccination for, meningitis within a racially/ethnically diverse sample of young men who have sex with men (YMSM) in Chicago and to explore any racial differences that might explain disparities seen in the broader MSM community                                                                                                                                                 | Adjusted odds ratio                                   |
| 25  | Pingali et al. [25]<br>Illinois  | Retrospective analysis from the 2020 NIS-Teen database of adolescents aged 13-17 years                                                                                             | US NIS-Teen database, 2020                                                                                                                                                   | To estimate coverage with ACIP-recommended adolescent vaccines: <ul style="list-style-type: none"> <li>▪ Tdap, MenACWY, and HPV vaccines (11-12 years)</li> <li>▪ Catch-up vaccination is recommended for HepB, HepA, MMR, and varicella vaccines for adolescents whose childhood vaccinations are not current</li> <li>▪ Booster dose of MenACWY vaccine at age 16 years</li> <li>▪ Shared clinical decision-making for</li> </ul> | <i>t</i> tests using Taylor-series variance estimates |

| No. | Reference/US geography (state)       | Study design                                                                                                                                                                                                                      | Population/N                                                                                   | Objective                                                                                                                                                                                 | Quantitative measures reported (e.g., OR, RR) |
|-----|--------------------------------------|-----------------------------------------------------------------------------------------------------------------------------------------------------------------------------------------------------------------------------------|------------------------------------------------------------------------------------------------|-------------------------------------------------------------------------------------------------------------------------------------------------------------------------------------------|-----------------------------------------------|
|     |                                      |                                                                                                                                                                                                                                   |                                                                                                | the serogroup B meningococcal vaccine (MenB) for persons aged 16-23 years                                                                                                                 |                                               |
| 26  | Pruitt et al. [26]<br>US, National   | Retrospective analysis of adolescent vaccination coverage for 3 vaccines: Tdap, MenACWY, and HPV                                                                                                                                  | Adolescents aged 13-17 years<br>N = 63,299                                                     | To describe the adolescent-, household-, and area-level characteristics associated with coverage patterns among all Tdap, MenACWY, and HPV in the US                                      | Unadjusted and adjusted odds ratio            |
| 27  | Rees-Clayton et al. [27]<br>Michigan | Retrospective analysis of 3 overlapping cohorts of 11-to 12-year-old children (n > 350,000 in each) to assess temporal trends in vaccination coverage, characteristics of those immunized, funding sources, and vaccination sites | Adolescents aged 11-12 years in Michigan<br>N = 1,081,542                                      | To describe vaccine coverage of Michigan young adolescents immunized with tetanus, diphtheria, and pertussis; meningococcal conjugate; and human papillomavirus vaccines during 2006-2008 | Odds ratio                                    |
| 28  | Richardson et al. [28]<br>Florida    | A cross-sectional analysis of survey data of MenB vaccine knowledge among parents and high-school students                                                                                                                        | Parents of 16- to 17-year-olds in Alachua County, Florida<br>N = 170                           | To identify rates and parent attitudes about MenB vaccination for 16- to 17-year-old adolescents                                                                                          | Qualitative study; not applicable             |
| 29  | Seib et al. [29]<br>Georgia          | A secondary cluster, randomized community trial among adolescent students enrolled in 11 schools in Georgia                                                                                                                       | Parents of middle- and high-school students attending 11 schools in Georgia<br>N = 686 parents | To examine the impact of a multifaceted intervention designed to promote vaccine acceptance among middle- and high-school adolescents in eastern Georgia                                  | Odds ratio                                    |

| No. | Reference/US geography (state)         | Study design                                                                                                                                                                                      | Population/N                                               | Objective                                                                                                                                                                                                                                     | Quantitative measures reported (e.g., OR, RR) |
|-----|----------------------------------------|---------------------------------------------------------------------------------------------------------------------------------------------------------------------------------------------------|------------------------------------------------------------|-----------------------------------------------------------------------------------------------------------------------------------------------------------------------------------------------------------------------------------------------|-----------------------------------------------|
| 30  | Singer et al. [30]<br>US, national     | A survey of insurance carriers in 47 states                                                                                                                                                       | Not applicable                                             | To examine a recent national sample of private health insurance plans in the US for which benefits data were available and determine the frequency with which benefits for recommended childhood, adolescent, and adult vaccines are included | Qualitative study; not applicable             |
| 31  | Srivastava et al. [31]<br>Pennsylvania | Online survey of US households                                                                                                                                                                    | Adults with $\geq 1$ dependent aged 16-19 years<br>N = 619 | To evaluate the impact of the new school-entry vaccine requirements on clinical practice and vaccination rates among requirement-eligible adolescents within a large pediatric network in metropolitan Philadelphia                           | Odds ratio                                    |
| 32  | Ghaswalla et al. [32]<br>US, national  | A retrospective analysis of pooled 2016-2018 NIS-Teen data was conducted, including adolescents with adequate provider-reported vaccination data who were aged 17 years at the time of the survey | Adolescents aged 17 years in the US<br>N = 10,995          | To identify factors associated with MenB vaccination, focusing on sociodemographic and healthcare resource use characteristics, as well as geographic region of residence                                                                     | Adjusted odds ratio                           |
| 33  | Kricorian et al. [33]<br>California    | A health literacy survey among adult female attendees of a health fair in an underserved area of Los Angeles                                                                                      | N = 43                                                     | To identify adult females' familiarity with and recognition of specific words including: measles, shingles, pertussis, hepatitis, meningitis, stroke, diabetes, pneumonia, and HPV                                                            | Qualitative study; not applicable             |

| No. | Reference/US geography                    |                                                                                                                                                      |                                   |                                                                  | Quantitative measures reported (e.g., OR, RR) |
|-----|-------------------------------------------|------------------------------------------------------------------------------------------------------------------------------------------------------|-----------------------------------|------------------------------------------------------------------|-----------------------------------------------|
|     | (state)                                   | Study design                                                                                                                                         | Population/N                      | Objective                                                        |                                               |
| 34  | Watkins and Feemster [34]<br>Not provided | A retrospective cohort study of 16- to 23-year-olds presenting to 31 primary care sites in a pediatric care network 23 October 2015 to 30 April 2017 | 16- to 23-year-olds<br>N = 45,428 | To estimate the update of MenB after a category B recommendation | Response rates                                |

ACIP = Advisory Committee on Immunization Practices; HCP = healthcare provider; HepA = hepatitis A; HepB = hepatitis B; HPV = human papillomavirus; MCV4 = meningococcal vaccine; MenACWY = meningococcal conjugate; MenB = serogroup B meningococcal; MMR = measles, mumps, and rubella; MSM = men who have sex with men; NIS-Teen = National Interview Survey-Teen; Tdap = tetanus, diphtheria, and pertussis; US = United States.

**Table S-4. CASP Quality Assessments Results for Qualitative Studies (n = 6)**

| Source                 | CASP checklist questions                                                             |                                                                       |                                                                              |                                                                           |                                                                        |                                                                                          |                                                        |                                                  |                                             |                                    |
|------------------------|--------------------------------------------------------------------------------------|-----------------------------------------------------------------------|------------------------------------------------------------------------------|---------------------------------------------------------------------------|------------------------------------------------------------------------|------------------------------------------------------------------------------------------|--------------------------------------------------------|--------------------------------------------------|---------------------------------------------|------------------------------------|
|                        | 1. Was there a clear statement of the aims of the research? (Yes, Can't tell, or No) | 2. Is a qualitative methodology appropriate? (Yes, Can't tell, or No) | 3. Was the research design appropriate to address the aims of the research?* | 4. Was the recruitment strategy appropriate to the aims of the research?* | 5. Was the data collected in a way that addressed the research issue?* | 6. Has the relationship between researcher and participants been adequately considered?* | 7. Have ethical issues been taken into consideration?* | 8. Was the data analysis sufficiently rigorous?* | 9. Is there a clear statement of findings?* | 10. How valuable is the research?* |
| Greenfield et al. [11] | Yes                                                                                  | Yes                                                                   | Yes                                                                          | Yes                                                                       | Yes                                                                    | Yes                                                                                      | Can't tell                                             | Yes                                              | Yes                                         | Yes                                |
| Huang et al. [14]      | Yes                                                                                  | Yes                                                                   | Yes                                                                          | Yes                                                                       | Yes                                                                    | Yes                                                                                      | Yes                                                    | Yes                                              | Yes                                         | Yes                                |
| Kricorian et al. [33]  | Yes                                                                                  | Yes                                                                   | Yes                                                                          | Yes                                                                       | Yes                                                                    | Yes                                                                                      | Can't tell                                             | Yes                                              | Yes                                         | Yes                                |
| Painter et al. [23]    | Yes                                                                                  | Yes                                                                   | Yes                                                                          | Yes                                                                       | Yes                                                                    | Yes                                                                                      | Yes                                                    | Yes                                              | Yes                                         | Yes                                |
| Richardson et al. [28] | Yes                                                                                  | Yes                                                                   | Yes                                                                          | Yes                                                                       | Yes                                                                    | Yes                                                                                      | Yes                                                    | Yes                                              | Yes                                         | Yes                                |
| Singer et al. [30]     | Yes                                                                                  | Yes                                                                   | Yes                                                                          | Yes                                                                       | Yes                                                                    | Yes                                                                                      | Yes                                                    | Yes                                              | Yes                                         | Yes                                |

CASP = Critical Appraisal Skills Programme.

\*Yes, No, Can't tell.

**Table S-5. CASP Quality Assessments Results for Cohort Studies (n = 28)**

| Source                   | Question                                           |                                                    |                                                            |                                                           |                                                                     |                                                                                        |                                                     |                                                 |                                                                                     |                                                                                     |                                 |                                                          |                                                                      |                                                            |
|--------------------------|----------------------------------------------------|----------------------------------------------------|------------------------------------------------------------|-----------------------------------------------------------|---------------------------------------------------------------------|----------------------------------------------------------------------------------------|-----------------------------------------------------|-------------------------------------------------|-------------------------------------------------------------------------------------|-------------------------------------------------------------------------------------|---------------------------------|----------------------------------------------------------|----------------------------------------------------------------------|------------------------------------------------------------|
|                          | 1. Did the study address a clearly focused issue?* | 2. Was the cohort recruited in an acceptable way?* | 3. Was the exposure accurately measured to minimize bias?* | 4. Was the outcome accurately measured to minimize bias?* | 5a. Have the authors identified all important confounding factors?* | 5b. Have they taken account of the confounding factors in the design and/or analysis?* | 6a. Was the follow-up of subjects complete enough?* | 6b. Was the follow-up of subjects long enough?* | 7. What are the results of this study? (e.g., ratio/rate difference, relative risk) | 8. How precise are the results? (e.g., range of the confidence intervals, if given) | 9. Do you believe the results?* | 10. Can the results be applied to the local population?* | 11. Do the results of this study fit with other available evidence?* | 12. What are the implications of this study for practice?* |
| Bart et al. [1]          | Yes                                                | Yes                                                | Can't tell                                                 | Can't tell                                                | Can't tell                                                          | Yes                                                                                    | Can't tell                                          | Can't tell                                      | Adjusted odds ratio                                                                 | Can't tell                                                                          | Yes                             | No                                                       | Yes                                                                  | Yes                                                        |
| Basta et al. [2]         | Yes                                                | Yes                                                | Yes                                                        | Yes                                                       | Yes                                                                 | Yes                                                                                    | NA                                                  | NA                                              | Adjusted odds                                                                       | 95% CI reported, ranges of CIs vary                                                 | Yes                             | No                                                       | Yes                                                                  | Yes                                                        |
| Bernstein et al. [3]     | Yes                                                | Yes                                                | Yes                                                        | Yes                                                       | Yes                                                                 | Yes                                                                                    | NA                                                  | NA                                              | Wallis <i>t</i> test                                                                | 95% CI reported, ranges of CIs vary                                                 | Yes                             | No                                                       | Yes                                                                  | Yes                                                        |
| Cataldi et al. [4]       | Yes                                                | Yes                                                | Yes                                                        | Yes                                                       | Can't tell                                                          | Can't tell                                                                             | NA                                                  | NA                                              | Response rates                                                                      | Can't tell                                                                          | Yes                             | No                                                       | Yes                                                                  | Yes                                                        |
| Coyne-Beasley et al. [5] | Yes                                                | Yes                                                | Yes                                                        | Yes                                                       | Yes                                                                 | Yes                                                                                    | NA                                                  | NA                                              | Odds ratio                                                                          | 95% CI reported, ranges of CIs vary                                                 | Yes                             | No                                                       | No                                                                   | Yes                                                        |
| Darden et al. [6]        | Yes                                                | Yes                                                | No                                                         | Yes                                                       | No                                                                  | Yes                                                                                    | NA                                                  | NA                                              | Odds ratio                                                                          | 95% CI reported, ranges of CIs vary                                                 | Yes                             | No                                                       | Yes                                                                  | Yes                                                        |
| Dorell et al. [7]        | Yes                                                | Yes                                                | Yes                                                        | Yes                                                       | Yes                                                                 | Yes                                                                                    | NA                                                  | NA                                              | Odds ratio                                                                          | 95% CI reported, ranges of CIs vary                                                 | Yes                             | Yes                                                      | Yes                                                                  | Yes                                                        |

| Source                   | Question                                           |                                                    |                                                            |                                                           |                                                                     |                                                                                        |                                                     |                                                 |                                                                                     |                                                                                     |                                 |                                                          |                                                                      |                                                            |
|--------------------------|----------------------------------------------------|----------------------------------------------------|------------------------------------------------------------|-----------------------------------------------------------|---------------------------------------------------------------------|----------------------------------------------------------------------------------------|-----------------------------------------------------|-------------------------------------------------|-------------------------------------------------------------------------------------|-------------------------------------------------------------------------------------|---------------------------------|----------------------------------------------------------|----------------------------------------------------------------------|------------------------------------------------------------|
|                          | 1. Did the study address a clearly focused issue?* | 2. Was the cohort recruited in an acceptable way?* | 3. Was the exposure accurately measured to minimize bias?* | 4. Was the outcome accurately measured to minimize bias?* | 5a. Have the authors identified all important confounding factors?* | 5b. Have they taken account of the confounding factors in the design and/or analysis?* | 6a. Was the follow-up of subjects complete enough?* | 6b. Was the follow-up of subjects long enough?* | 7. What are the results of this study? (e.g., ratio/rate difference, relative risk) | 8. How precise are the results? (e.g., range of the confidence intervals, if given) | 9. Do you believe the results?* | 10. Can the results be applied to the local population?* | 11. Do the results of this study fit with other available evidence?* | 12. What are the implications of this study for practice?* |
| Gargano et al. [8]       | Yes                                                | Yes                                                | Yes                                                        | Yes                                                       | Yes                                                                 | No                                                                                     | Yes                                                 | Yes                                             | "Fisher's exact test and chi-square tests"                                          | Can't tell                                                                          | Yes                             | No                                                       | Yes                                                                  | Yes                                                        |
| Ghaswalla et al. [32]    | Yes                                                | Yes                                                | Yes                                                        | Yes                                                       | Yes                                                                 | Yes                                                                                    | Can't tell                                          | Can't tell                                      | Adjusted odds ratio                                                                 | 95% CI reported, ranges of CIs vary                                                 | Yes                             | No                                                       | Yes                                                                  | Yes                                                        |
| Gowda and Dempsey [9]    | Yes                                                | Yes                                                | Yes                                                        | Yes                                                       | Yes                                                                 | Yes                                                                                    | NA                                                  | NA                                              | Change in coverage rate                                                             | 95% CI reported, ranges of CIs vary                                                 | Yes                             | No                                                       | Yes                                                                  | Yes                                                        |
| Gowda et al. [10]        | Yes                                                | Yes                                                | Yes                                                        | Yes                                                       | No                                                                  | Yes                                                                                    | Yes                                                 | Yes                                             | Adjusted odds ratio                                                                 | 95% CI reported, ranges of CIs vary                                                 | Yes                             | No                                                       | Yes                                                                  | Yes                                                        |
| Hansen and Niccolai [12] | Yes                                                | Yes                                                | Yes                                                        | Yes                                                       | No                                                                  | Yes                                                                                    | NA                                                  | NA                                              | Unadjusted and adjusted odds ratio                                                  | % CI reported, ranges of CIs vary                                                   | Yes                             | No                                                       | Yes                                                                  | Yes                                                        |
| Healy et al. [13]        | Yes                                                | Yes                                                | Yes                                                        | Yes                                                       | No                                                                  | Yes                                                                                    | NA                                                  | NA                                              | Adjusted coverage prevalence ratio                                                  | % CI reported, ranges of CIs vary                                                   | Yes                             | No                                                       | Yes                                                                  | Yes                                                        |
| Kempe et al. [15]        | Yes                                                | Yes                                                | Yes                                                        | Yes                                                       | Yes                                                                 | Yes                                                                                    | NA                                                  | NA                                              | Risk ratio                                                                          | 95% CI reported, ranges of CIs vary                                                 | Yes                             | Yes                                                      | Yes                                                                  | Yes                                                        |
| Kempe et al. [16]        | Yes                                                | Yes                                                | Yes                                                        | Yes                                                       | Yes                                                                 | Yes                                                                                    | NA                                                  | NA                                              | Adjusted odds ratio                                                                 | 95% CI reported, ranges of CIs vary                                                 | Yes                             | No                                                       | Yes                                                                  | Yes                                                        |

| Source               | Question                                           |                                                    |                                                            |                                                           |                                                                     |                                                                                        |                                                     |                                                 |                                                                                     |                                                                                     |                                 |                                                          |                                                                      |                                                            |
|----------------------|----------------------------------------------------|----------------------------------------------------|------------------------------------------------------------|-----------------------------------------------------------|---------------------------------------------------------------------|----------------------------------------------------------------------------------------|-----------------------------------------------------|-------------------------------------------------|-------------------------------------------------------------------------------------|-------------------------------------------------------------------------------------|---------------------------------|----------------------------------------------------------|----------------------------------------------------------------------|------------------------------------------------------------|
|                      | 1. Did the study address a clearly focused issue?* | 2. Was the cohort recruited in an acceptable way?* | 3. Was the exposure accurately measured to minimize bias?* | 4. Was the outcome accurately measured to minimize bias?* | 5a. Have the authors identified all important confounding factors?* | 5b. Have they taken account of the confounding factors in the design and/or analysis?* | 6a. Was the follow-up of subjects complete enough?* | 6b. Was the follow-up of subjects long enough?* | 7. What are the results of this study? (e.g., ratio/rate difference, relative risk) | 8. How precise are the results? (e.g., range of the confidence intervals, if given) | 9. Do you believe the results?* | 10. Can the results be applied to the local population?* | 11. Do the results of this study fit with other available evidence?* | 12. What are the implications of this study for practice?* |
| Kurosky et al. [17]  | Yes                                                | Yes                                                | Yes                                                        | Yes                                                       | Yes                                                                 | Yes                                                                                    | NA                                                  | NA                                              | Adjusted odds ratio                                                                 | 95% CI reported ranges of CIs vary                                                  | Yes                             | No                                                       | Yes                                                                  | Yes                                                        |
| La et al. [18]       | Yes                                                | Yes                                                | Yes                                                        | Yes                                                       | Yes                                                                 | Yes                                                                                    | NA                                                  | NA                                              | Odds ratio                                                                          | 95% CI reported, ranges of CIs vary                                                 | Yes                             | Yes                                                      | Yes                                                                  | Yes                                                        |
| Lu et al. [19]       | Yes                                                | Yes                                                | Yes                                                        | Yes                                                       | No                                                                  | Yes                                                                                    | NA                                                  | NA                                              | Adjusted prevalence ratios                                                          | 95% CI reported, ranges of CIs vary                                                 | Yes                             | Yes                                                      | Yes                                                                  | Yes                                                        |
| Moss et al. [20].    | Yes                                                | Yes                                                | Yes                                                        | Yes                                                       | Yes                                                                 | Yes                                                                                    | NA                                                  | NA                                              | Odds ratio                                                                          | 95% CI reported, ranges of CIs vary                                                 | Yes                             | Yes                                                      | Yes                                                                  | Yes                                                        |
| Niccolai et al. [21] | Yes                                                | Yes                                                | Yes                                                        | Yes                                                       | Yes                                                                 | Yes                                                                                    | NA                                                  | NA                                              | Adjusted odds ratio                                                                 | 95% CI reported, ranges of CIs vary                                                 | Yes                             | Yes                                                      | Yes                                                                  | Yes                                                        |
| Packnett et al. [22] | Yes                                                | Yes                                                | Yes                                                        | Yes                                                       | Yes                                                                 | Yes                                                                                    | Yes                                                 | Yes                                             | Adjusted relative risk                                                              | 95% CI reported, ranges of CIs vary                                                 | Yes                             | No                                                       | Yes                                                                  | Yes                                                        |
| Phillips et al. [24] | Yes                                                | Yes                                                | Yes                                                        | Yes                                                       | Yes                                                                 | Yes                                                                                    | NA                                                  | NA                                              | Adjusted odds ratio                                                                 | 95% CI reported, ranges of CIs vary                                                 | Yes                             | No                                                       | Yes                                                                  | Yes                                                        |
| Pingali et al. [25]  | Yes                                                | Yes                                                | Yes                                                        | Yes                                                       | Yes                                                                 | Yes                                                                                    | NA                                                  | NA                                              | t tests using Taylor-series variance estimates were used to                         | 95% CI reported, ranges of CIs vary                                                 | Yes                             | No                                                       | Yes                                                                  | Yes                                                        |

| Source                   | Question                                           |                                                    |                                                            |                                                           |                                                                     |                                                                                        |                                                     |                                                 |                                                                                                             |                                                                                     |                                 |                                                          |                                                                      |                                                            |
|--------------------------|----------------------------------------------------|----------------------------------------------------|------------------------------------------------------------|-----------------------------------------------------------|---------------------------------------------------------------------|----------------------------------------------------------------------------------------|-----------------------------------------------------|-------------------------------------------------|-------------------------------------------------------------------------------------------------------------|-------------------------------------------------------------------------------------|---------------------------------|----------------------------------------------------------|----------------------------------------------------------------------|------------------------------------------------------------|
|                          | 1. Did the study address a clearly focused issue?* | 2. Was the cohort recruited in an acceptable way?* | 3. Was the exposure accurately measured to minimize bias?* | 4. Was the outcome accurately measured to minimize bias?* | 5a. Have the authors identified all important confounding factors?* | 5b. Have they taken account of the confounding factors in the design and/or analysis?* | 6a. Was the follow-up of subjects complete enough?* | 6b. Was the follow-up of subjects long enough?* | 7. What are the results of this study? (e.g., ratio/rate difference, relative risk)                         | 8. How precise are the results? (e.g., range of the confidence intervals, if given) | 9. Do you believe the results?* | 10. Can the results be applied to the local population?* | 11. Do the results of this study fit with other available evidence?* | 12. What are the implications of this study for practice?* |
|                          |                                                    |                                                    |                                                            |                                                           |                                                                     |                                                                                        |                                                     |                                                 | assess vaccination coverage differences by survey year (2020 vs. 2019) and between socio-demographic groups |                                                                                     |                                 |                                                          |                                                                      |                                                            |
| Pruitt et al. [26]       | Yes                                                | Yes                                                | Yes                                                        | Yes                                                       | Yes                                                                 | Yes                                                                                    | NA                                                  | NA                                              | Unadjusted and adjusted odds ratio                                                                          | 95% CI reported, ranges of CIs vary                                                 | Yes                             | No                                                       | Yes                                                                  | Yes                                                        |
| Rees-Clayton et al. [27] | Yes                                                | Yes                                                | Yes                                                        | Yes                                                       | Yes                                                                 | Yes                                                                                    | NA                                                  | NA                                              | Odds ratio                                                                                                  | 95% CI reported, ranges of CIs vary                                                 | Yes                             | No                                                       | Yes                                                                  | Yes                                                        |
| Seib et al. [29]         | Yes                                                | Yes                                                | Yes                                                        | Yes                                                       | Yes                                                                 | Yes                                                                                    | Yes                                                 | Yes                                             | Odds ratio                                                                                                  | 95% CI reported, ranges of CIs vary                                                 | Yes                             | No                                                       | Yes                                                                  | Yes                                                        |
| Srivastava et al. [31]   | Yes                                                | Yes                                                | Yes                                                        | Yes                                                       | Yes                                                                 | Yes                                                                                    | NA                                                  | NA                                              | Odds ratio                                                                                                  | 95% CI reported, ranges of CIs vary                                                 | Yes                             | No                                                       | Yes                                                                  | Yes                                                        |

| Source                    | Question                                           |                                                    |                                                            |                                                           |                                                                     |                                                                                        |                                                     |                                                 |                                                                                     |                                                                                     |                                 |                                                          |                                                                      |                                                            |
|---------------------------|----------------------------------------------------|----------------------------------------------------|------------------------------------------------------------|-----------------------------------------------------------|---------------------------------------------------------------------|----------------------------------------------------------------------------------------|-----------------------------------------------------|-------------------------------------------------|-------------------------------------------------------------------------------------|-------------------------------------------------------------------------------------|---------------------------------|----------------------------------------------------------|----------------------------------------------------------------------|------------------------------------------------------------|
|                           | 1. Did the study address a clearly focused issue?* | 2. Was the cohort recruited in an acceptable way?* | 3. Was the exposure accurately measured to minimize bias?* | 4. Was the outcome accurately measured to minimize bias?* | 5a. Have the authors identified all important confounding factors?* | 5b. Have they taken account of the confounding factors in the design and/or analysis?* | 6a. Was the follow-up of subjects complete enough?* | 6b. Was the follow-up of subjects long enough?* | 7. What are the results of this study? (e.g., ratio/rate difference, relative risk) | 8. How precise are the results? (e.g., range of the confidence intervals, if given) | 9. Do you believe the results?* | 10. Can the results be applied to the local population?* | 11. Do the results of this study fit with other available evidence?* | 12. What are the implications of this study for practice?* |
| Watkins and Feemster [34] | Yes                                                | Can't tell                                         | Yes                                                        | Yes                                                       | Yes                                                                 | Yes                                                                                    | Can't tell                                          | Can't tell                                      | Rates of MenACWY booster receipt                                                    | Can't tell                                                                          | Yes                             | Can't tell                                               | Yes                                                                  | Yes                                                        |

CASP = Critical Appraisal Skills Programme; CI = confidence interval; MenACWY = meningococcal conjugate; NA = not applicable.

\*Yes, No, Can't tell.

**Table S-6. Summary of Variation in Meningococcal Vaccine Coverage by Race/Ethnicity**

| Publication              | Population, N                                                                     | Vaccinated (MenACWY/MenB)                                                                                                                                                                                                                                                                                     | Results/Comparative Measure                                                                                                                                                                                                                                                                                                                                                                                                                                |
|--------------------------|-----------------------------------------------------------------------------------|---------------------------------------------------------------------------------------------------------------------------------------------------------------------------------------------------------------------------------------------------------------------------------------------------------------|------------------------------------------------------------------------------------------------------------------------------------------------------------------------------------------------------------------------------------------------------------------------------------------------------------------------------------------------------------------------------------------------------------------------------------------------------------|
| Phillips et al. [24]     | Young MSM<br>16-29 years old<br>N = 486                                           | Meningococcal serogroup not reported: Self-reported: 49%                                                                                                                                                                                                                                                      | Vaccination coverage higher for White persons compared with Black persons<br><ul style="list-style-type: none"> <li>Unadjusted OR: 2.02 (95% CI, 1.20-3.38; <math>P &lt; 0.05</math>)</li> <li>Adjusted OR: 2.63 (95% CI, 1.49-4.64)</li> </ul>                                                                                                                                                                                                            |
| Pruitt et al. [26]       | 13- to 17-year-olds<br>N = 63,299<br>2015-2017                                    | MenACWY ( $\geq 1$ dose; parent/guardian reported):<br>Overall: 84.9%<br><ul style="list-style-type: none"> <li>Black: 84.2%</li> <li>White: 81.7%</li> </ul>                                                                                                                                                 | Vaccination coverage higher for non-Hispanic Black persons than non-Hispanic White persons                                                                                                                                                                                                                                                                                                                                                                 |
| Niccolai et al. [21]     | 17-year-olds<br>N = 3,807                                                         | MenACWY (provider reported up to date <sup>a</sup> ):<br><ul style="list-style-type: none"> <li>White: 48.3%</li> <li>Black: 59.8%</li> </ul>                                                                                                                                                                 | Vaccination coverage higher for Black adolescents compared with White adolescents<br><ul style="list-style-type: none"> <li>Unadjusted OR: 1.60 (95% CI, 1.15-2.22)</li> <li>Adjusted OR: 1.81 (95% CI, 1.26-2.60)</li> </ul> Vaccination coverage higher for Hispanic persons compared with White adolescents<br><ul style="list-style-type: none"> <li>Unadjusted OR: 1.11 (95% CI, 0.78-1.60)</li> <li>Adjusted OR: 1.63 (95% CI, 1.11-2.39)</li> </ul> |
| Coyne-Beasley et al. [5] | 11-17 years<br>N = 1,281                                                          | MenACWY (parent/guardian reported)<br>Of those who were aware of MenACWY (n=703):<br>44% (n = 280)                                                                                                                                                                                                            | Vaccination coverage higher for non-Hispanic African Americans compared with non-Hispanic Whites<br><ul style="list-style-type: none"> <li>Bivariate OR: 2.19 (95% CI, 1.32-3.63; <math>P &lt; 0.05</math>)</li> <li>Multivariate OR: 2.17 (95% CI, 1.29-3.65; <math>P &lt; 0.05</math>)</li> </ul>                                                                                                                                                        |
| Kurosky et al. [17]      | Younger: 10.5-13 years old<br>n=376,825<br>Older: 15.5-18 years old<br>n= 419,814 | MenACWY ( $\geq 1$ dose; claims data <sup>b</sup> )<br><ul style="list-style-type: none"> <li>Younger: 71.7%</li> <li>Older: 48.9%</li> </ul>                                                                                                                                                                 | Vaccination coverage higher for Black adolescents (N=189,879) versus White adolescents (N=227,156)<br><ul style="list-style-type: none"> <li>Adjusted OR: 1.33 (95% CI, 1.31-1.35)</li> </ul>                                                                                                                                                                                                                                                              |
| La et al. [18]           | 17-year-olds<br>N = 7,288                                                         | MenB vaccine $\geq 1$ dose (provider reported), % (95% CI)<br><ul style="list-style-type: none"> <li>Hispanic: 20.8 (16.4-26.1)</li> <li>Non-Hispanic White only: 13.5 (12.0-15.2)</li> <li>Non-Hispanic Black only: 16.1 (11.7-21.8)</li> <li>Non-Hispanic other/multiple races: 17.4 (11.8-24.8)</li> </ul> | Vaccination coverage similar for non-Hispanic Black compared with non-Hispanic White (data controlled for demographic variables, insurance status, and previous vaccines)<br><ul style="list-style-type: none"> <li>Adjusted OR: 0.74 (95% CI, 0.48-1.14)</li> </ul> No statistical difference between non-Hispanic Black and non-Hispanic White                                                                                                           |
| Bart et al. [1]          | 16- to 18-year-olds<br>N = 85,489                                                 | MenB ( $\geq 1$ dose)<br><ul style="list-style-type: none"> <li>Black: 15.9%</li> </ul> Note: abstract data not provided for other races                                                                                                                                                                      | Adolescents who reported unknown or other race were more likely than Black/African American to receive MenB<br>Unknown: Adjusted OR: 1.36<br>Other: Adjusted OR: 1.24<br>$P < 0.0001$ for both                                                                                                                                                                                                                                                             |

| Publication               | Population, N                                                                                                                             | Vaccinated (MenACWY/MenB)                                                                                                                                                                                                                                                                                                                                                                                                                                                                | Results/Comparative Measure                                                                                                                   |
|---------------------------|-------------------------------------------------------------------------------------------------------------------------------------------|------------------------------------------------------------------------------------------------------------------------------------------------------------------------------------------------------------------------------------------------------------------------------------------------------------------------------------------------------------------------------------------------------------------------------------------------------------------------------------------|-----------------------------------------------------------------------------------------------------------------------------------------------|
| Packnett et al. [22]      | 16-23 years old<br>N = 213,162<br><ul style="list-style-type: none"> <li>Commercial: n = 156,080</li> <li>Medicaid: n = 57,082</li> </ul> | MenB (series completion)<br>Black: (n = 21,748) <ul style="list-style-type: none"> <li>MenB-4C: 42.9%</li> <li>MenB-FHbp: 30.8%</li> </ul> White: (n = 24,203) <ul style="list-style-type: none"> <li>MenB-4C: 50.7%</li> <li>MenB-FHbp: 33.6%</li> </ul> Hispanic: (n = 4,909) <ul style="list-style-type: none"> <li>MenB-4C: 50.0%</li> <li>MenB-FHbp: 41.5%</li> </ul> Other: (n = 6,165) <ul style="list-style-type: none"> <li>MenB-4C: 52.6%</li> <li>MenB-FHbp: 37.2%</li> </ul> | MenB series completion rates were lower among Black persons compared with White persons (Medicaid only) Adjusted RR: 0.86 (95% CI, 0.84-0.88) |
| Watkins and Feemster [34] | 16-23 years old<br>N = 45,428                                                                                                             | ≥1 dose MenB, % (out of n) <ul style="list-style-type: none"> <li>White: 27% (out of 26,280)</li> <li>Black: 18% (out of 13,186)</li> <li>Asian: 22% (out of 1,237)</li> </ul>                                                                                                                                                                                                                                                                                                           | Not applicable                                                                                                                                |

CI = confidence interval; MSM = men who have sex with men; MenACWY = meningococcal conjugate; MenB = serogroup B meningococcal; MenB-FHbp = Trumenba<sup>®</sup>; MenB-4c = Bexsero<sup>®</sup>; OR = odds ratio; RR = rate ratio.

<sup>a</sup>Adolescents were up to date for the MenACWY vaccine if they received either 2 doses of MenACWY by age 17 or 1 dose at age 16 or 17 years.

<sup>b</sup> Commercial Claims and Encounters (CCAE) and MultiSite Medicaid Market Scan Research databases, maintained by Truven Health Analytics, LLC an IBM company (Truven Health).

**Table S-7. Summary of differences in MenACWY and MenB coverage by Population Density**

| Publication               | Population,<br>N                                                          | Vaccinated<br>(MenACWY/MenB)                                                                                                                                                                                                                                                                                                                                                                          | Results/Qualitative Measure                                                                                                                                               |
|---------------------------|---------------------------------------------------------------------------|-------------------------------------------------------------------------------------------------------------------------------------------------------------------------------------------------------------------------------------------------------------------------------------------------------------------------------------------------------------------------------------------------------|---------------------------------------------------------------------------------------------------------------------------------------------------------------------------|
| Kurosky et al. [17]       | Younger: 10.5-13 years<br>n=376,825<br>Older: 15.5-18 years<br>n= 419,814 | MenACWY ( $\geq 1$ dose; claims data <sup>a</sup> )<br>Age: 10.5-13 years<br><ul style="list-style-type: none"> <li>▪ Rural: 58.21%</li> <li>▪ Urban: 73.69%</li> <li>▪ Unknown: 70.24%</li> </ul> MenACWY ( $\geq 1$ dose; claims data <sup>a</sup> )<br>Age: 15.5-18 years<br><ul style="list-style-type: none"> <li>▪ Rural: 34.24%</li> <li>▪ Urban: 51.10%</li> <li>▪ Unknown: 52.26%</li> </ul> | Multivariate analysis showed lower coverage for rural residents compared with urban residents<br>Adjusted OR: 0.72 (95% CI, 0.71-0.73)                                    |
| Pingali et al. [25]       | 13-17 years<br>N = 20,163                                                 | MenACWY (first dose; provider reported)<br><ul style="list-style-type: none"> <li>▪ Non-MSA: 85.7%</li> <li>▪ MSA nonprincipal city: 89.4%</li> <li>▪ MSA principal city: 90.2%</li> </ul> MenACWY (second dose; provider reported)<br><ul style="list-style-type: none"> <li>▪ Non-MSA: 50.1%</li> <li>▪ MSA nonprincipal city: 58.5%</li> <li>▪ MSA principal city: 50.6%</li> </ul>                | Only the coverages for first dose in non-MSAs and second dose in MSA nonprincipal cities were statistically significantly different from those in the other regions.      |
| Pruitt et al. [26]        | 13- to 17-year-olds<br>N = 63,299                                         | MenACWY ( $\geq 1$ dose; parent/guardian reported):<br><ul style="list-style-type: none"> <li>▪ Overall: 82.8%</li> <li>▪ Rural: 73.3%</li> <li>▪ Urban: 83.9%</li> </ul>                                                                                                                                                                                                                             | Coverage higher in urban areas than in rural                                                                                                                              |
| Bernstein et al. [3]      | 11-12 years old<br>N = not reported                                       | MenACWY (median % coverage)<br><ul style="list-style-type: none"> <li>▪ Blue states (Democratic affiliation): 79.3%</li> <li>▪ Red states (Republican affiliation): 72.8%</li> </ul>                                                                                                                                                                                                                  | Coverage higher in blue states than in red states when the results were controlled for sociodemographics<br>Adjusted difference: 14.1% (95% CI, 7.5%-21.0%; $P < 0.001$ ) |
| Gowda et al. [10]         | 11-18 years<br>N = 1,252,655                                              | MenACWY<br><ul style="list-style-type: none"> <li>▪ Urban: 48.9%</li> <li>▪ Suburban: 47.9%</li> <li>▪ Large/small town: 44.4%</li> </ul>                                                                                                                                                                                                                                                             | Suburban and large/small town compared with urban residents<br>Adjusted OR: 0.95 (95% CI, 0.94-0.97)                                                                      |
| Watkins and Feemster [34] | 16-23 years old<br>N = 45,428                                             | $\geq 1$ dose MenB, % (out of n)<br><ul style="list-style-type: none"> <li>▪ Urban: 21% (9,845)</li> <li>▪ Suburban: 20% (35,583)</li> </ul>                                                                                                                                                                                                                                                          | Not applicable                                                                                                                                                            |

CI = confidence interval; MenACWY = meningococcal conjugate; MenB = serogroup B meningococcal; MSA = metropolitan statistical area; OR = odds ratio.

<sup>a</sup> Commercial Claims and Encounters (CCAЕ) and MultiState Medicaid Market Scan Research data, maintained by Truven Health Analytics, LLC and IBM company (Truven Health).

**Table S-8. Estimated MenACWY vaccination coverage and doses among adolescents aged 13–17<sup>a</sup> years, by MSA<sup>b</sup> and by poverty level — National Immunization Survey-Teen, United States, 2020**

| Vaccine               | MSA, % (95% CI) <sup>c</sup>     |                                  |                     | Below poverty level, % (95% CI) <sup>c</sup> |                     |                     | At or above poverty level, % (95% CI) <sup>c</sup> |                                  |                     |
|-----------------------|----------------------------------|----------------------------------|---------------------|----------------------------------------------|---------------------|---------------------|----------------------------------------------------|----------------------------------|---------------------|
|                       | MSA nonprincipal city            |                                  | MSA principal city  | MSA nonprincipal city                        |                     | MSA principal city  | MSA nonprincipal city                              |                                  | MSA principal city  |
|                       | Non-MSA<br>(n = 3,678)           | (n = 8,409)                      | (n = 8,076)         | Non-MSA<br>(n = 631)                         | (n = 865)           | (n = 1,352)         | Non-MSA<br>(n = 2,938)                             | (n = 7,246)                      | (n = 6,420)         |
| MenACWY <sup>d</sup>  |                                  |                                  |                     |                                              |                     |                     |                                                    |                                  |                     |
| ≥1 dose               | 85.7<br>(83.7–87.5) <sup>e</sup> | 89.4<br>(87.9–90.7)              | 90.2<br>(88.7–91.5) | 86.1<br>(81.8–89.5) <sup>e</sup>             | 87.2<br>(82.6–90.6) | 91.6<br>(88.8–93.7) | 85.6<br>(83.2–87.7) <sup>e</sup>                   | 90.2<br>(88.6–91.5)              | 89.4<br>(87.5–91.0) |
| ≥2 doses <sup>f</sup> | 50.1<br>(43.4–56.9)              | 58.5<br>(54.0–62.8) <sup>e</sup> | 50.6<br>(45.2–56.1) | 47.4<br>(33.5–61.7)                          | 47.6<br>(33.0–62.7) | 48.6<br>(35.8–61.7) | 50.2<br>(42.3–58.0)                                | 61.2<br>(56.6–65.6) <sup>e</sup> | 50.2<br>(44.1–56.4) |

CI = confidence interval; MenACWY = meningococcal conjugate; MSA = metropolitan statistical area.

<sup>a</sup>Adolescents (n = 20,163) in the 2020 NIS-Teen were born during January 2002–January 2008.

<sup>b</sup>MSA status was determined based on household-reported county of residence and was grouped into 3 categories: MSA principal city, MSA nonprincipal city, and non-MSA. MSA and principal city were defined according to US Census Bureau (<https://www.census.gov/programs-surveys/metro-micro.html>). Non-MSA areas include urban populations not located within an MSA, as well as completely rural areas.

<sup>c</sup>Estimates with 95% CI widths >20 might not be reliable.

<sup>d</sup>Includes percentages receiving MenACWY and meningococcal-unknown type vaccine.

<sup>e</sup>Statistically significant difference ( $P < 0.05$ ) in estimated vaccination coverage by metropolitan statistical area; referent group was adolescents living in MSA principal city areas.

<sup>f</sup>≥2 doses of MenACWY or meningococcal-unknown type vaccine. Calculated only among adolescents who were aged 17 years at interview. Does not include adolescents who received 1 dose of MenACWY vaccine at age ≥16 years.

Source: Adapted from Pingali et al. [25].

**Table S-9. Summary of Socioeconomic Status and MenACWY and MenB Vaccine Coverage**

| Publication          | Population, N                 | Vaccinated (MenACWY/MenB)                                                                                                                                                                                                                                                                                                                                                                                                                                                                                                                                   | Results/Comparative Measure, OR (95% CI)                                                                                                                                                                                            |
|----------------------|-------------------------------|-------------------------------------------------------------------------------------------------------------------------------------------------------------------------------------------------------------------------------------------------------------------------------------------------------------------------------------------------------------------------------------------------------------------------------------------------------------------------------------------------------------------------------------------------------------|-------------------------------------------------------------------------------------------------------------------------------------------------------------------------------------------------------------------------------------|
| Niccolai et al. [21] | 17 years old<br>N = 3,807     | MenACWY (provider reported up to date <sup>a</sup> ):<br>Annual poverty level earnings <ul style="list-style-type: none"> <li>▪ Above poverty level and &gt;\$75,000: 50.7%</li> <li>▪ Above poverty level but ≤\$75,000: 47.3%</li> <li>▪ Below poverty level: 54.6%</li> </ul>                                                                                                                                                                                                                                                                            | Annual poverty level earnings <ul style="list-style-type: none"> <li>▪ &gt;\$75,000 unadjusted OR: 0.75 (0.52-1.08)</li> <li>▪ ≤\$75,000 unadjusted OR: 0.86 (0.60-1.22)</li> </ul> Note: differences not statistically significant |
| Pingali et al. [25]  | 13-17 years old<br>N = 20,163 | MenACWY (first dose; provider reported)<br>Below poverty level, at or above poverty level <sup>b,c</sup> <ul style="list-style-type: none"> <li>▪ Non-MSA: 86.1%, 85.6%</li> <li>▪ MSA nonprincipal city: 87.2%, 90.2%</li> <li>▪ MSA principal city: 91.6%, 89.4%</li> </ul> MenACWY (second dose; provider reported)<br>Below poverty level, at or above poverty level <sup>b,c</sup> <ul style="list-style-type: none"> <li>▪ Non-MSA: 47.4%, 50.2%</li> <li>▪ MSA nonprincipal city: 47.6%, 61.2%</li> <li>▪ MSA principal city: 48.6% 50.2%</li> </ul> | Not estimated                                                                                                                                                                                                                       |
| Pruitt et al. [26]   | 13-17 years old<br>N = 63,299 | MenACWY (≥1 dose; parent/guardian reported):<br>Compared with annual poverty level <ul style="list-style-type: none"> <li>▪ ≤\$75,000: 80.4%</li> <li>▪ &gt;\$75,000: 84.1%</li> <li>▪ Below: 83.7%</li> </ul>                                                                                                                                                                                                                                                                                                                                              | Not estimated                                                                                                                                                                                                                       |
| La et al. [18]       | 17 years old<br>N = 7,288     | MenB (≥1 dose; provider reported)<br>Compared with annual poverty level: <ul style="list-style-type: none"> <li>▪ &gt;\$75,000: 14.9%</li> <li>▪ ≤\$75,000: 14.1%</li> <li>▪ Below: 19.6 (15.0-25.1)</li> </ul> No significant difference                                                                                                                                                                                                                                                                                                                   | Not estimated                                                                                                                                                                                                                       |
| Bart et al. [1]      | 16-18 years old<br>N = 85,489 | MenB (≥1 dose)                                                                                                                                                                                                                                                                                                                                                                                                                                                                                                                                              | Individuals in a neighborhood with median income >\$100,000 were more likely to receive MenB than those in a neighborhood with median income < \$20,000<br>Adjusted OR: 1.63; <i>P</i> < 0.0001                                     |

CI = confidence interval; MenACWY = meningococcal conjugate; MenB = serogroup B meningococcal; MSA = metropolitan statistical area; OR = odds ratio.

<sup>a</sup>Adolescent up to date for MenACWY if they either received 2 doses of MenACWY by age 17 years or 1 dose at age 16 or 17 years.

<sup>b</sup>Adolescents were classified as being below the federal poverty level if their total family income was less than the level specified for the applicable family size and number of children aged <18 years. All others were classified as at or above the poverty level (<https://www.census.gov/data/tables/time-series/demo/income-poverty/historical-poverty-thresholds.html>). Poverty status was unknown for 711 adolescents.

<sup>c</sup>MSA status was determined from household reported city and county of residence and was grouped into 3 categories: MSA principal city, MSA nonprincipal city, and non-MSA. MSA and MSA principal city were defined as by the US Census Bureau (<https://www.census.gov/programs-surveys/metromicro.html>). Non-MSAs include urban populations not located within an MSA and completely rural areas.

**Table S-10. Summary of Studies Reporting Parent/Guardian Vaccine Awareness**

| Publication              | Population, N                                     | Aware of Meningitis/<br>Meningococcal<br>disease, % | Aware of<br>MenACWY<br>and MenB, % | Aware of MenACWY, %                                                                                                                                          | Aware of<br>MenB, %                                                                                                                                                                       | Vaccinated<br>(MenACWY/MenB)                                                                                                                                                                                                                                                                  |
|--------------------------|---------------------------------------------------|-----------------------------------------------------|------------------------------------|--------------------------------------------------------------------------------------------------------------------------------------------------------------|-------------------------------------------------------------------------------------------------------------------------------------------------------------------------------------------|-----------------------------------------------------------------------------------------------------------------------------------------------------------------------------------------------------------------------------------------------------------------------------------------------|
| Basta et al. [2]         | Parents of teens attending high school<br>N = 445 | 91.5%                                               | 75.5%                              | 31.2%                                                                                                                                                        | 20% Bexsero®<br>18% Trumenba®                                                                                                                                                             | Not applicable                                                                                                                                                                                                                                                                                |
| Richardson et al. [28]   | 16- to 17-year-olds<br>N = 170                    | 94%                                                 | Not reported                       | 61%                                                                                                                                                          | 40%                                                                                                                                                                                       | Of those who were aware of MenB <ul style="list-style-type: none"> <li>50% of parents reported their adolescent had been vaccinated</li> <li>23% vaccination status was verified with state vaccination records</li> </ul>                                                                    |
| Coyne-Beasley et al. [5] | 11- to 17-year-olds<br>N = 1,281                  | Not reported                                        | Not applicable                     | 65%<br>Note: Less likely to have heard of MenACWY if the children were Hispanic compared with non-Hispanic White children:<br>OR = 0.50, (95% CI, 0.28-0.89) | Not applicable                                                                                                                                                                            | 44% reported their children had been vaccinated with MenACWY                                                                                                                                                                                                                                  |
| Srivastava et al. [31]   | 16- to 19-year-olds<br>N = 619                    | Not applicable                                      | Not applicable                     | Not applicable                                                                                                                                               | 43% <sup>a</sup><br>Race/ethnicity <ul style="list-style-type: none"> <li>White, non-Hispanic: 60%</li> <li>Black, non-Hispanic: 12%</li> <li>Hispanic: 23%</li> <li>Other: 5%</li> </ul> | Of those who were aware of MenB:<br>Parent reported vaccinated: 36%<br>Race/ethnicity (aware and vaccinated: n =161)<br>Race/ethnicity <ul style="list-style-type: none"> <li>White, non-Hispanic: 56%</li> <li>Black, non-Hispanic: 15%</li> <li>Hispanic: 20%</li> <li>Other: 8%</li> </ul> |
| Greenfield et al. [11]   | 11-18 years old<br>N = 157                        | Not applicable                                      | Not applicable                     | 33%<br>Bivariate analysis showed significant differences in MenACWY awareness among the 3 ethnic groups ( $P < 0.001$ )                                      | Not applicable                                                                                                                                                                            | Of those who were aware of MenACWY:<br>Parent reported vaccinated: 77%                                                                                                                                                                                                                        |
| Painter et al. [23]      | 13-17 years old<br>N = 30                         | 50%                                                 | Not applicable                     | 20%                                                                                                                                                          | Not applicable                                                                                                                                                                            | Of the 30 total respondents: Parent-reported vaccinated: 16.7%                                                                                                                                                                                                                                |

CI = confidence interval; MenACWY = meningococcal conjugate; MenB = serogroup B meningococcal; OR = odds ratio.

<sup>a</sup>Weighted % based on US population distribution.

**Table S-11. MenB Vaccination Awareness by Race/Ethnicity and Vaccination Status (N = 619)**

| <b>Race/ethnicity</b> | <b>Aware of MenB<br/>vaccines<br/>(n = 467)</b> | <b>Not aware of<br/>MenB vaccines<br/>(n = 155)</b> | <b>Aware of and<br/>vaccinated/intend<br/>to vaccinate<br/>(N = 312)</b> | <b>Aware of but<br/>do not intend<br/>to vaccinate<br/>(n = 155)</b> | <b>Aware of and<br/>vaccinated<br/>(n = 161)</b> | <b>Aware of and<br/>intend to<br/>vaccinate<br/>(n = 151)</b> | <b>Unaware of<br/>but interested<br/>(n = 52)</b> | <b>Unaware of<br/>but not<br/>interested<br/>(n = 103)</b> |
|-----------------------|-------------------------------------------------|-----------------------------------------------------|--------------------------------------------------------------------------|----------------------------------------------------------------------|--------------------------------------------------|---------------------------------------------------------------|---------------------------------------------------|------------------------------------------------------------|
| White, non-Hispanic   | 60%                                             | 42%                                                 | 56%                                                                      | 65%                                                                  | 56%                                              | 55%                                                           | 39%                                               | 56%                                                        |
| Black, non-Hispanic   | 12%                                             | 14%                                                 | 14%                                                                      | 10%                                                                  | 15%                                              | 10%                                                           | 12%                                               | 19%                                                        |
| Hispanic              | 23%                                             | 34%                                                 | 22%                                                                      | 23%                                                                  | 20%                                              | 26%                                                           | 39%                                               | 15%                                                        |
| Other                 | 5%                                              | 10%                                                 | 8%                                                                       | 2%                                                                   | 8%                                               | 8%                                                            | 11%                                               | 11%                                                        |

MenB = meningococcal B vaccine.

Note: All percentages in the table refer to weighted percentage.

Source: Adapted from Srivastava et al. [31].

**Figure S-1. Meningococcal Disease on US College Campuses, 2013-2019**

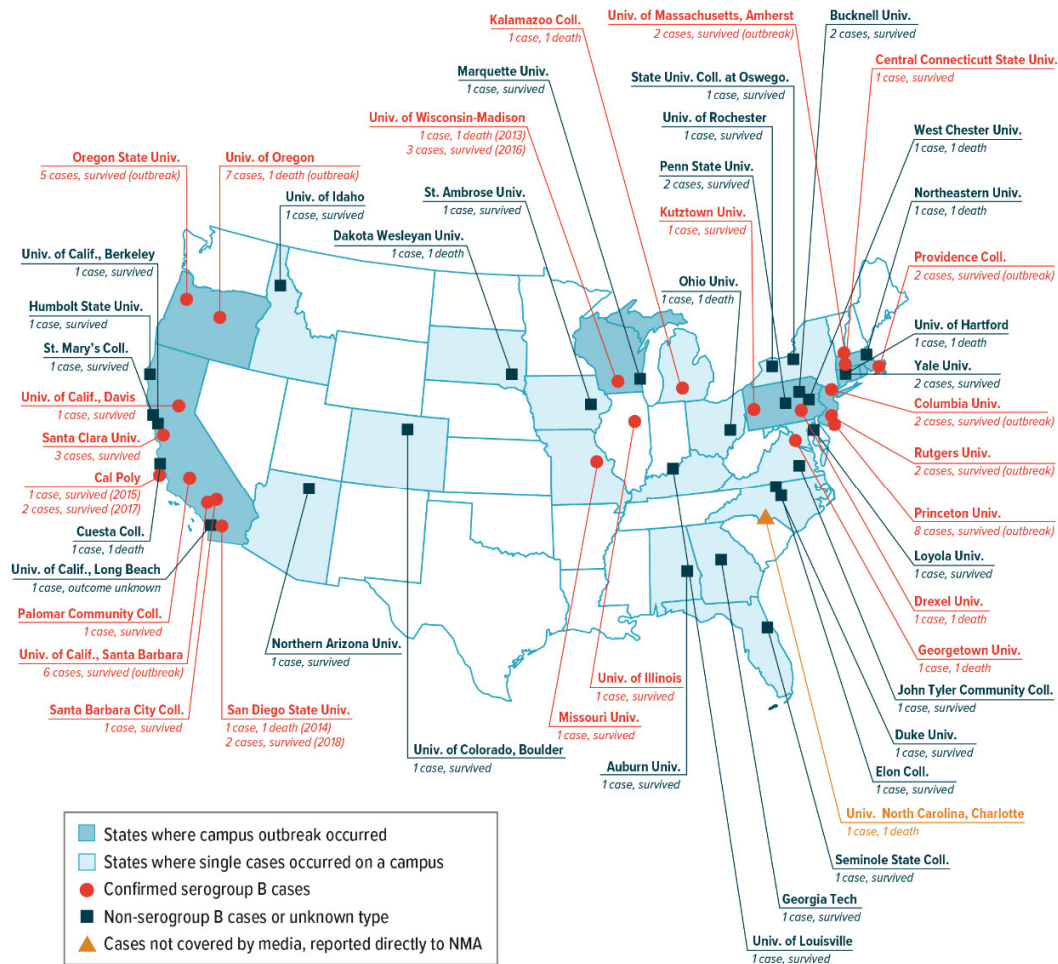

Source: National Meningitis Association [35].

## REFERENCES

1. Bart S.M.; Eberhart M.; Feemster K. Impact of a Category B Recommendation: Meningococcal B (MenB) Vaccine Uptake Among Adolescents in Philadelphia County. 2018. Available online: <https://plan.core-apps.com/pas2018/abstract/e5177900e60498db774eaebbee6695f0> (accessed on 19 July 2022).
2. Basta N.E.; Becker A.B.; Li Q.; Nederhoff D. Parental Awareness of Meningococcal B Vaccines and Willingness to Vaccinate Their Teens. *Vaccine* 2019, 37, 670-6. doi:<http://dx.doi.org/https://dx.doi.org/10.1016/j.vaccine.2018.11.078>.
3. Bernstein S.; North A.; Schwartz J.; Niccolai L.M. State-Level Voting Patterns and Adolescent Vaccination Coverage in the United States, 2014. *Am J Pub Health* 2016, 106, 1879-81. doi:<http://dx.doi.org/https://dx.doi.org/10.2105/AJPH.2016.303381>.
4. Cataldi J.R.; Brewer S.E.; Perreira C.; Furniss A.; Nederveld A.; Suresh K.; Williams C.; O'Leary S.T.; Dempsey A.F. Rural Adolescent Immunization: Delivery Practices and Barriers to Uptake. *J Am Board Fam Med* 2021, 34, 937-49. doi:<http://dx.doi.org/https://dx.doi.org/10.3122/jabfm.2021.05.210107>.
5. Coyne-Beasley T.; Reiter P.L.; Liberty A.C.; Ford C.A.; Miles D.R.; Brewer N.T. Awareness Is not Enough: The Need to Increase Meningococcal Vaccine Uptake. *Clin Pediatr* 2013, 52, 441-50. doi:<http://dx.doi.org/https://dx.doi.org/10.1177/0009922813481847>.
6. Darden P.M.; Thompson D.M.; Roberts J.R.; Hale J.J.; Pope C.; Naifeh M.; Jacobson R.M. Reasons for not Vaccinating Adolescents: National Immunization Survey of Teens, 2008-2010. *Pediatrics* 2013, 131, 645-51. doi:<http://dx.doi.org/https://dx.doi.org/10.1542/peds.2012-2384>.
7. Dorell C.; Yankey D.; Kennedy A.; Stokley S. Factors That Influence Parental Vaccination Decisions for Adolescents, 13 to 17 Years Old: National Immunization Survey-Teen, 2010. *Clin Pediatr* 2013, 52, 162-70. doi:<http://dx.doi.org/https://dx.doi.org/10.1177/0009922812468208>.
8. Gargano L.M.; Herbert N.L.; Painter J.E.; Sales J.M.; Morfaw C.; Rask K.; Murray D.; DiClemente R.J.; Hughes J.M. Impact of a Physician Recommendation and Parental Immunization Attitudes on Receipt or Intention to Receive Adolescent Vaccines. *Human Vacc Immunother* 2013, 9, 2627-33. doi:<http://dx.doi.org/https://dx.doi.org/10.4161/hv.25823>.
9. Gowda C.; Dempsey A.F. Medicaid Reimbursement and the Uptake of Adolescent Vaccines. *Vaccine* 2012, 30, 1682-9. doi:<http://dx.doi.org/https://dx.doi.org/10.1016/j.vaccine.2011.12.097>.

10. Gowda C.; Dong S.; Potter R.C.; Dombkowski K.J.; Dempsey A.F. A Population-Level Assessment of Factors Associated With Uptake of Adolescent-Targeted Vaccines in Michigan. *J Adolesc Health* 2013, 53, 498-505. doi:<http://dx.doi.org/https://dx.doi.org/10.1016/j.jadohealth.2013.07.022>.
11. Greenfield L.S.; Page L.C.; Kay M.; Li-Vollmer M.; Breuner C.C.; Duchin J.S. Strategies for Increasing Adolescent Immunizations in Diverse Ethnic Communities. *J Adolesc Health* 2015, 56, S47-53. doi:<http://dx.doi.org/https://dx.doi.org/10.1016/j.jadohealth.2014.10.274>.
12. Hansen C.E.; Niccolai L.M. Factors Associated With Receipt of Meningococcal B Vaccine Among United States Adolescents, National Immunization Survey-Teen, 2017-2018. *J Adolesc Health* 2021, 69, 769-73. doi:<http://dx.doi.org/https://dx.doi.org/10.1016/j.jadohealth.2021.04.029>.
13. Healy J.; Rodriguez-Lainz A.; Elam-Evans L.D.; Hill H.A.; Reagan-Steiner S.; Yankey D. Vaccination Coverage Among Foreign-Born and U.S.-Born Adolescents in the United States: Successes and Gaps – National Immunization Survey-Teen, 2012–2014. *Vaccine* 2018, 36, 1743-50. doi:<http://dx.doi.org/10.1016/j.vaccine.2018.02.052>.
14. Huang L.; Goren A.; Lee L.K.; Li V.W.; Dempsey A.; Srivastava A. Disparities in Healthcare Providers' Interpretations and Implementations of ACIP's Meningococcal Vaccine Recommendations. *Hum Vaccin Immunother* 2020, 16, 933-44. doi:<http://dx.doi.org/https://dx.doi.org/10.1080/21645515.2019.1682845>.
15. Kempe A.; Allison M.A.; MacNeil J.R.; O'Leary S.T.; Crane L.A.; Beaty B.L.; Hurley L.P.; Brtnikova M.; Lindley M.C.; Albert A.P. Adoption of Serogroup B Meningococcal Vaccine Recommendations. *Pediatrics* 2018, 142. doi:<http://dx.doi.org/https://dx.doi.org/10.1542/peds.2018-0344>.
16. Kempe A.; Allison M.A.; MacNeil J.R.; O'Leary S.T.; Crane L.A.; Beaty B.L.; Hurley L.P.; Brtnikova M.; Lindley M.C.; Liang J.L., et al. Knowledge and Attitudes Regarding Category B ACIP Recommendations Among Primary Care Providers for Children. *Acad Pediatr* 2018, 18, 763-8. doi:<http://dx.doi.org/https://dx.doi.org/10.1016/j.acap.2018.04.005>.
17. Kurosky S.K.; Esterberg E.; Irwin D.E.; Trantham L.; Packnett E.; Novy P.; Whelan J.; Hoge C. Meningococcal Vaccination Among Adolescents in the United States: A Tale of Two Age Platforms. *The Journal of adolescent health : official publication of the Society for Adolescent Medicine* 2019, 65, 107-15. doi:<http://dx.doi.org/https://dx.doi.org/10.1016/j.jadohealth.2019.02.014>.
18. La E.M.; Garbinsky D.; Hunter S.; Poston S.; Novy P.; Ghaswalla P. Meningococcal B Vaccination Coverage Among Older Adolescents in the United States. *Vaccine* 2021, 39, 2660-7. doi:<http://dx.doi.org/https://dx.doi.org/10.1016/j.vaccine.2021.03.071>.

19. Lu P.-J.; Yankey D.; Jeyarajah J.; O'Halloran A.; Fredua B.; Elam-Evans L.D.; Reagan-Steiner S. Association of Health Insurance Status and Vaccination Coverage Among Adolescents 13-17 Years of Age. *J Pediatr* 2018, 195, 256-62.e1. doi:<http://dx.doi.org/https://dx.doi.org/10.1016/j.jpeds.2017.12.024>.
20. Moss J.L.; Reiter P.L.; Rimer B.K.; Brewer N.T. Collaborative Patient-Provider Communication and Uptake of Adolescent Vaccines. *Soc Sci Med* 2016, 159, 100-7. doi:<http://dx.doi.org/https://dx.doi.org/10.1016/j.socscimed.2016.04.030>.
21. Niccolai L.M.; Yakely A.E.; Hansen C.E. Up-to-Date Coverage With Meningococcal Vaccine Among Adolescents Age 17 Years: Patterns and Correlates in the United States, 2017. *Vaccine* 2019, 37, 5934-8. doi:<http://dx.doi.org/https://dx.doi.org/10.1016/j.vaccine.2019.08.015>.
22. Packnett E.R.; Zimmerman N.M.; Kim G.; Novy P.; Morgan L.C.; Chime N.; Ghaswalla P. A Real-world Claims Data Analysis of Meningococcal Serogroup B Vaccine Series Completion and Potential Missed Opportunities in the United States. *Pediatr Infect Dis J* 2022, 41, e158-e65. doi:<http://dx.doi.org/https://dx.doi.org/10.1097/INF.0000000000003455>.
23. Painter J.E.; Viana De O Mesquita S.; Jimenez L.; Avila A.A.; Sutter C.J.; Sutter R. Vaccine-Related Attitudes and Decision-Making Among Uninsured, Latin American Immigrant Mothers of Adolescent Daughters: A Qualitative Study. *Hum Vacc Immunother* 2019, 15, 121-33. doi:<http://dx.doi.org/https://dx.doi.org/10.1080/21645515.2018.1514353>.
24. Phillips G., 2nd; Johnson A.K.; Adames C.N.; Mustanski B. Meningitis Vaccination, Knowledge, and Awareness Among YMSM in Chicago. *Health Educ Behav* 2018, 45, 607-15. doi:<http://dx.doi.org/https://dx.doi.org/10.1177/1090198117752786>.
25. Pingali C.; Yankey D.; Elam-Evans L.D.; Markowitz L.E.; Williams C.L.; Fredua B.; McNamara L.A.; Stokley S.; Singleton J.A. National, Regional, State, and Selected Local Area Vaccination Coverage Among Adolescents Aged 13-17 Years - United States, 2020. *MMWR Morb Mortal Wkly Rep* 2021, 70, 1183-90. doi:<http://dx.doi.org/https://dx.doi.org/10.15585/mmwr.mm7035a1>.
26. Pruitt S.L.; Tiro J.A.; Kepka D.; Henry K. Missed Vaccination Opportunities Among U.S. Adolescents by Area Characteristics. *Am J Prevent Med* 2022, 62, 538-47. doi:<http://dx.doi.org/https://dx.doi.org/10.1016/j.amepre.2021.10.014>.
27. Rees-Clayton E.; Montgomery J.P.; Enger K.S.; Boulton M.L. Trends in Michigan Early Adolescent Immunization: 2006-2008. *Am J Pub Health* 2012, 102, 1735-41. doi:<http://dx.doi.org/https://dx.doi.org/10.2105/AJPH.2011.300577>.

28. Richardson E.; Ryan K.A.; Lawrence R.M.; Harle C.A.; Young A.; Livingston M.D.; Rawal A.; Staras S.A.S. Perceptions and Knowledge About the MenB Vaccine Among Parents of High School Students. *J Comm Health* 2021, 46, 808-16. doi:<http://dx.doi.org/https://dx.doi.org/10.1007/s10900-020-00954-1>.
29. Seib K.; Underwood N.L.; Gargano L.M.; Sales J.M.; Morfaw C.; Weiss P.; Murray D.; Vogt T.M.; DiClemente R.J.; Hughes J.M. Preexisting Chronic Health Conditions and Health Insurance Status Associated With Vaccine Receipt Among Adolescents. *J Adolesc Health* 2016, 58, 148-53. doi:<http://dx.doi.org/https://dx.doi.org/10.1016/j.jadohealth.2015.10.009>.
30. Singer D.C.; Davis M.M.; Gebremariam A.; Clark S.J. Underinsurance for Recently Recommended Vaccines in Private Health Plans. *J Community Health* 2012, 37, 1164-7. doi:<http://dx.doi.org/https://dx.doi.org/10.1007/s10900-012-9567-7>.
31. Srivastava A.; Dempsey A.; Galitsky A.; Fahimi M.; Huang L. Parental Awareness and Utilization of Meningococcal Serogroup B Vaccines in the United States. *BMC Public Health* 2020, 20, 1109. doi:<http://dx.doi.org/https://dx.doi.org/10.1186/s12889-020-09181-8>.
32. Ghaswalla P.K.; Garbinsky D.; Poston S.; Hunter S.; Novy P.; La E.M. Correlates of and Disparities in Meningococcal B Vaccination Coverage Among 17-year-olds in the United States: A Pooled Analysis of 2016-2018 National Immunization Survey-Teen. *Pediatrics* 2021, 147, 296-8. doi:<http://dx.doi.org/10.1542/peds.147.3-MeetingAbstract.296-a>.
33. Kricorian K.; Lopez D.; Seu M.; Pham T.; Kigoonya R.; Equils O. The Role of Health Literacy in Vaccination Disparities: Do Patients Understand the Health Messages? *Open Forum Infectious Diseases* 2020, 7, S44. doi:<http://dx.doi.org/10.1093/ofid/ofaa417.085>.
34. Watkins E.; Feemster K. Factors Associated With Uptake of Meningococcus B Vaccination After an ACIP Category B Recommendation. *Open Forum Infect Dis* 2018, 5, S737.
35. National Meningitis Association. Meningococcal Disease on U.S. College Campuses, 2013-2019. 2019. Available online: [https://nmaus.org/wp-content/uploads/2019/04/Alembic\\_NMA\\_Map\\_r28.pdf](https://nmaus.org/wp-content/uploads/2019/04/Alembic_NMA_Map_r28.pdf) (accessed on 14 November 2022).
